# Supplementary material for: Half-sandwich ruthenium(ii) complexes with tethered arene-phosphinite ligands: synthesis, structure and application in catalytic cross dehydrogenative coupling reactions of silanes and alcohols
Source: Royal Society of Chemistry journal article supplement (doi:10.1039/c9dt04421c), 2019-12-02
Supplement: c9dt04421c1.pdf [file c9dt04421c1.pdf]

## Supporting Information

# Half-sandwich ruthenium(II) complexes with tethered arene-phosphinite ligands: Synthesis, structure and application in catalytic cross dehydrogenative coupling reactions of silanes and alcohols

Rebeca González-Fernández, Pascale Crochet,\* and Victorio Cadierno\*

*Laboratorio de Compuestos Organometálicos y Catálisis (Unidad Asociada al CSIC), Centro de Innovación en Química Avanzada (ORFEO-CINQA), Departamento de Química Orgánica e Inorgánica, Instituto Universitario de Química Organometálica “Enrique Moles”, Facultad de Química, Universidad de Oviedo, Julián Clavería 8, E-33006 Oviedo, Spain*

*E-mail: [crochetpascale@uniovi.es](mailto:crochetpascale@uniovi.es) (P.C.); [vcm@uniovi.es](mailto:vcm@uniovi.es) (V.C.).*

### Contents

|                                                                                                                                                                |         |
|----------------------------------------------------------------------------------------------------------------------------------------------------------------|---------|
| Figures S1-S36: NMR spectra of the non-tethered complexes <b>5-7a-c</b> .                                                                                      | S2-S19  |
| Figures S37-S54: NMR spectra of the tethered complexes <b>9-10a-c</b> .                                                                                        | S20-S28 |
| Figures S55-S78: NMR spectra of the alkoxy silanes isolated from the catalytic reactions.                                                                      | S29-S40 |
| Figures S79: Kinetic profile of the dehydrogenative cross-coupling reaction of Me <sub>2</sub> PhSiH with MeOH catalyzed by 0.005 mol% of complex <b>10c</b> . | S41     |

## NMR spectra of the non-tethered complexes 5-7a-c

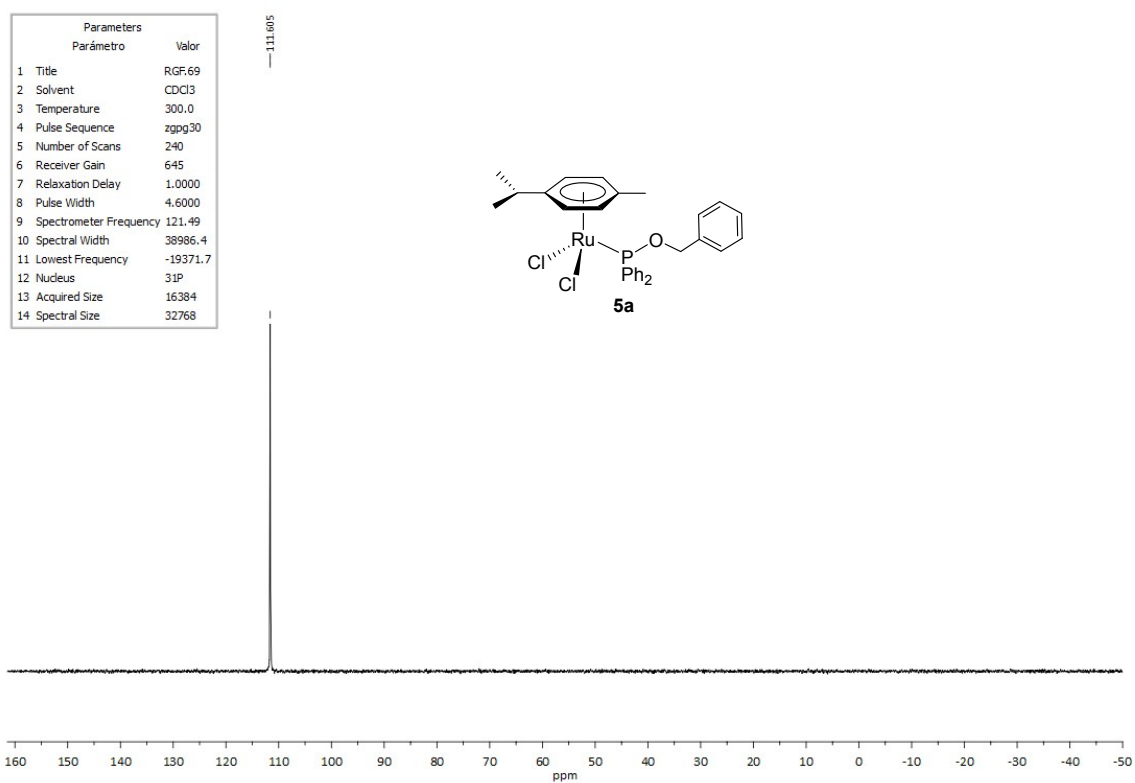

**Figure S1:** <sup>31</sup>P{<sup>1</sup>H} NMR spectrum (121 MHz, CDCl<sub>3</sub>) of complex **5a**.

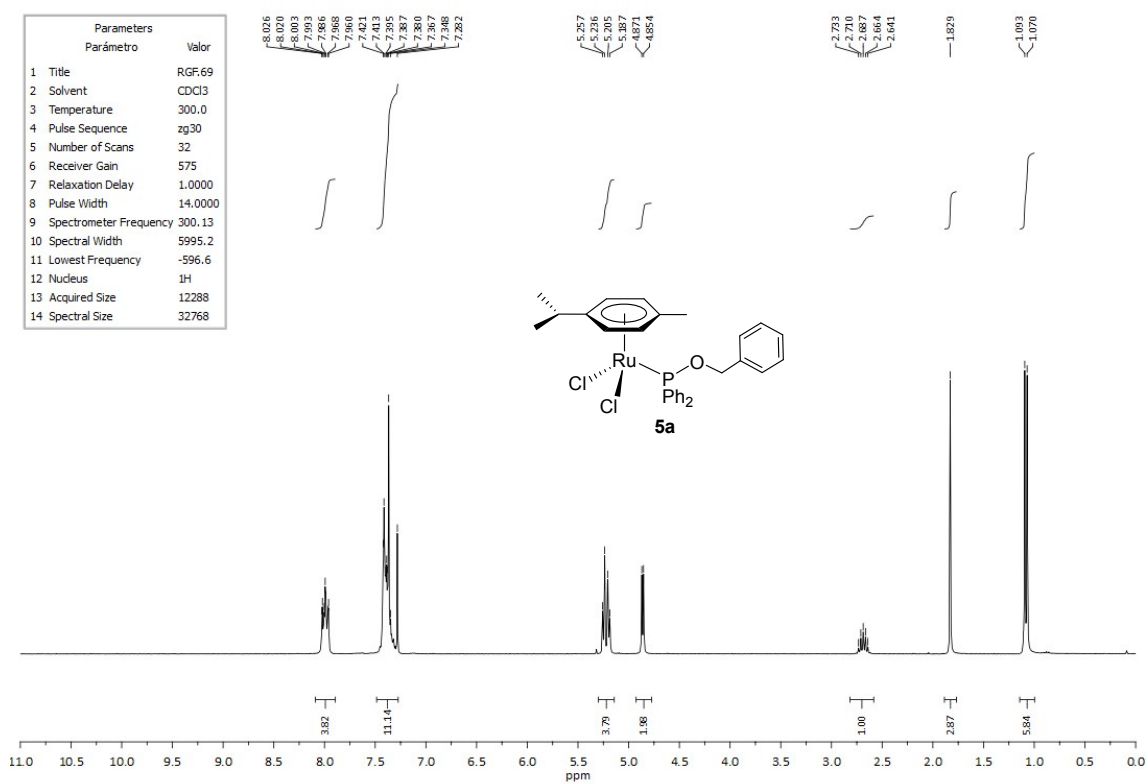

**Figure S2:** <sup>1</sup>H NMR spectrum (300 MHz, CDCl<sub>3</sub>) of complex **5a**.

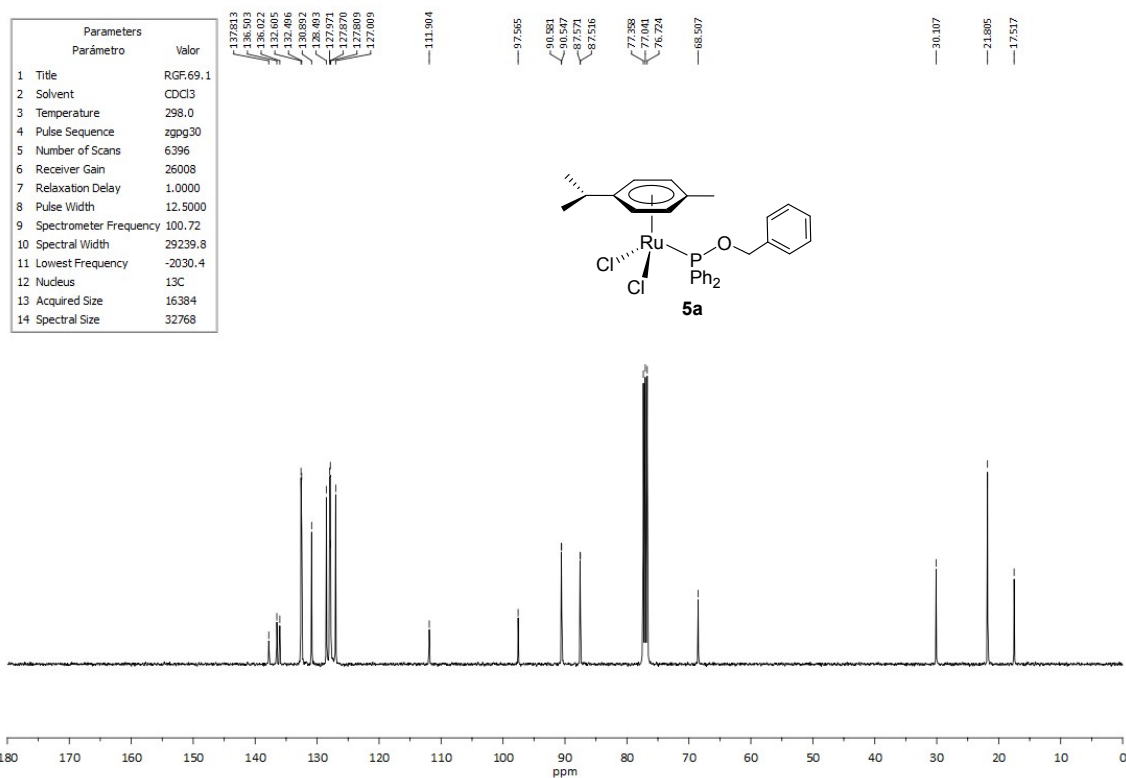

**Figure S3:**  $^{13}\text{C}\{^1\text{H}\}$  NMR spectrum (100 MHz,  $\text{CDCl}_3$ ) of complex **5a**.

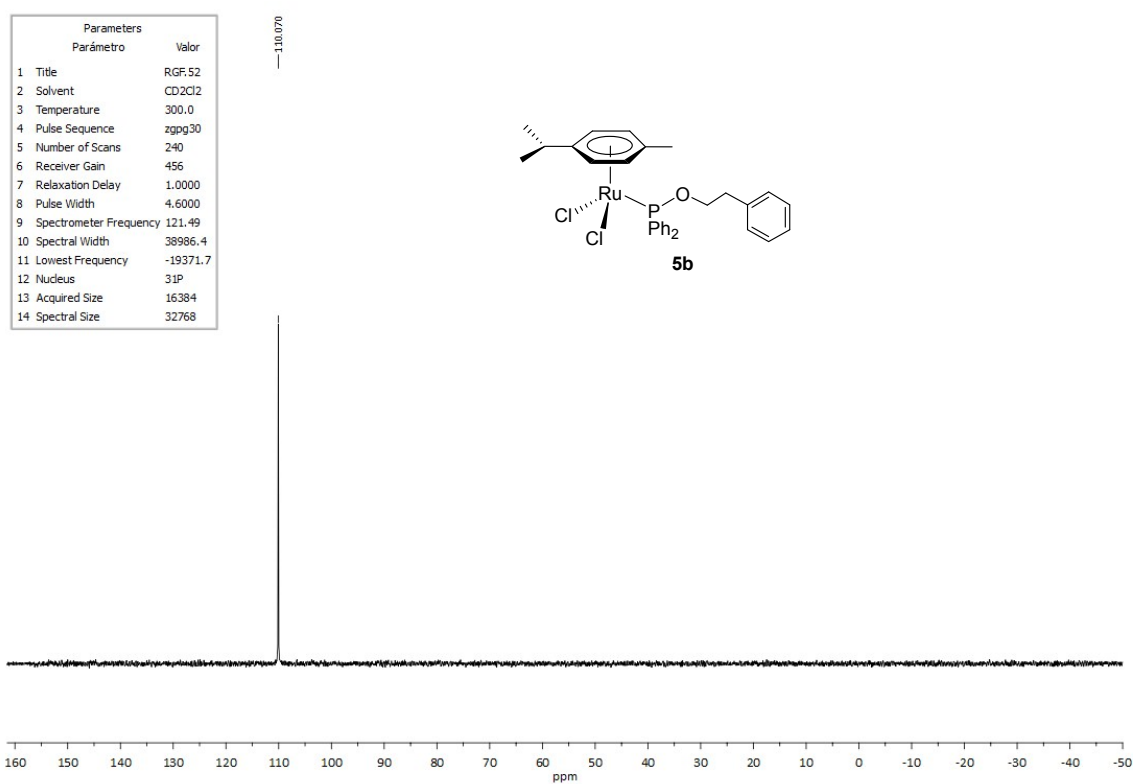

**Figure S4:**  $^{31}\text{P}\{^1\text{H}\}$  NMR spectrum (121 MHz,  $\text{CD}_2\text{Cl}_2$ ) of complex **5b**.

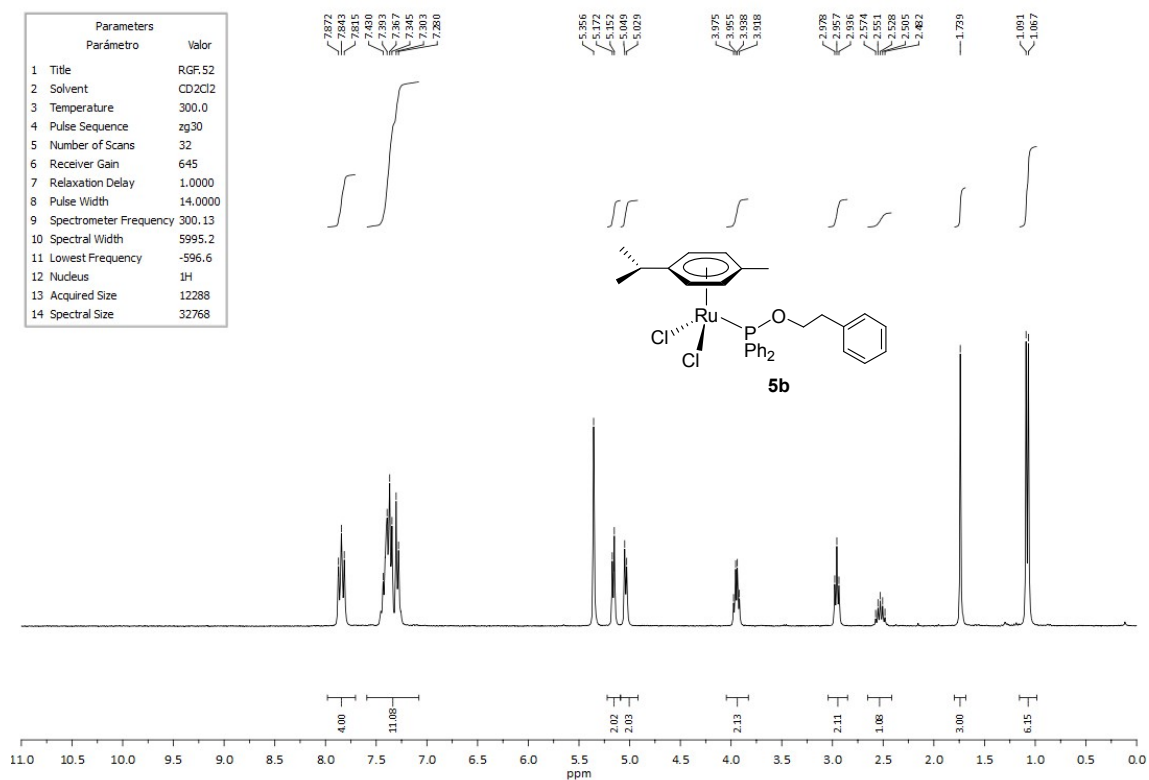

**Figure S5:** <sup>1</sup>H NMR spectrum (300 MHz, CD<sub>2</sub>Cl<sub>2</sub>) of complex **5b**.

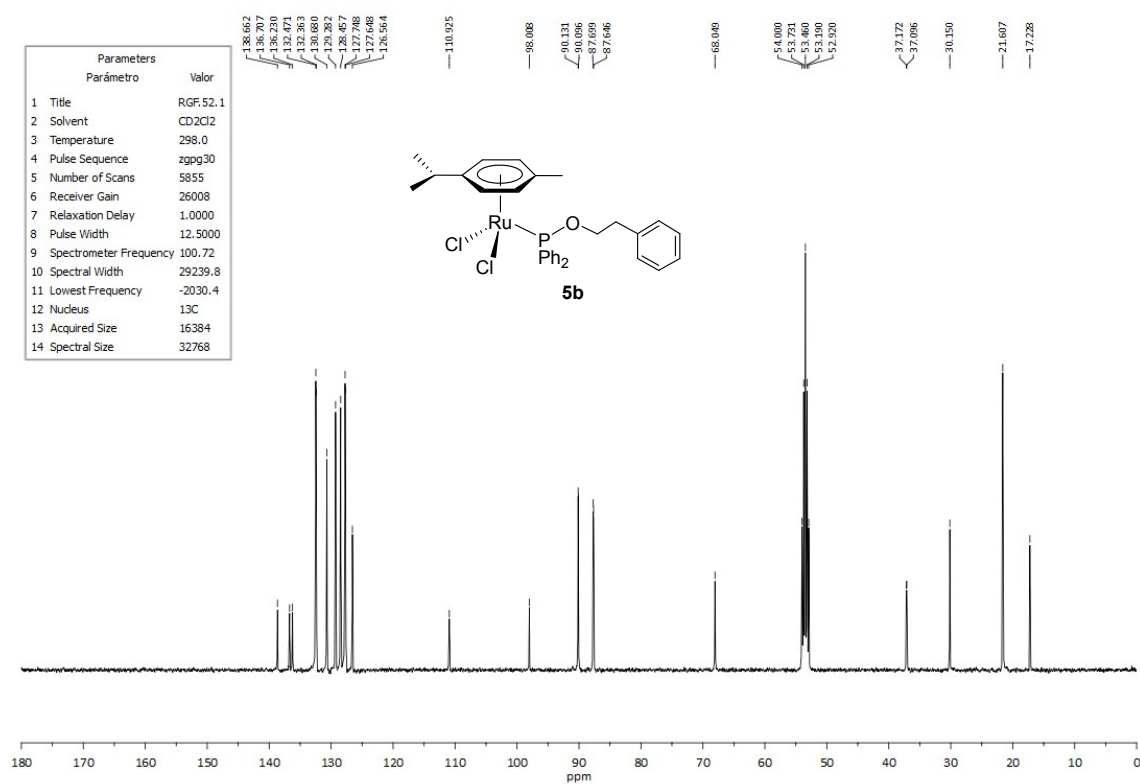

**Figure S6:** <sup>13</sup>C{<sup>1</sup>H} NMR spectrum (100 MHz, CD<sub>2</sub>Cl<sub>2</sub>) of complex **5b**.

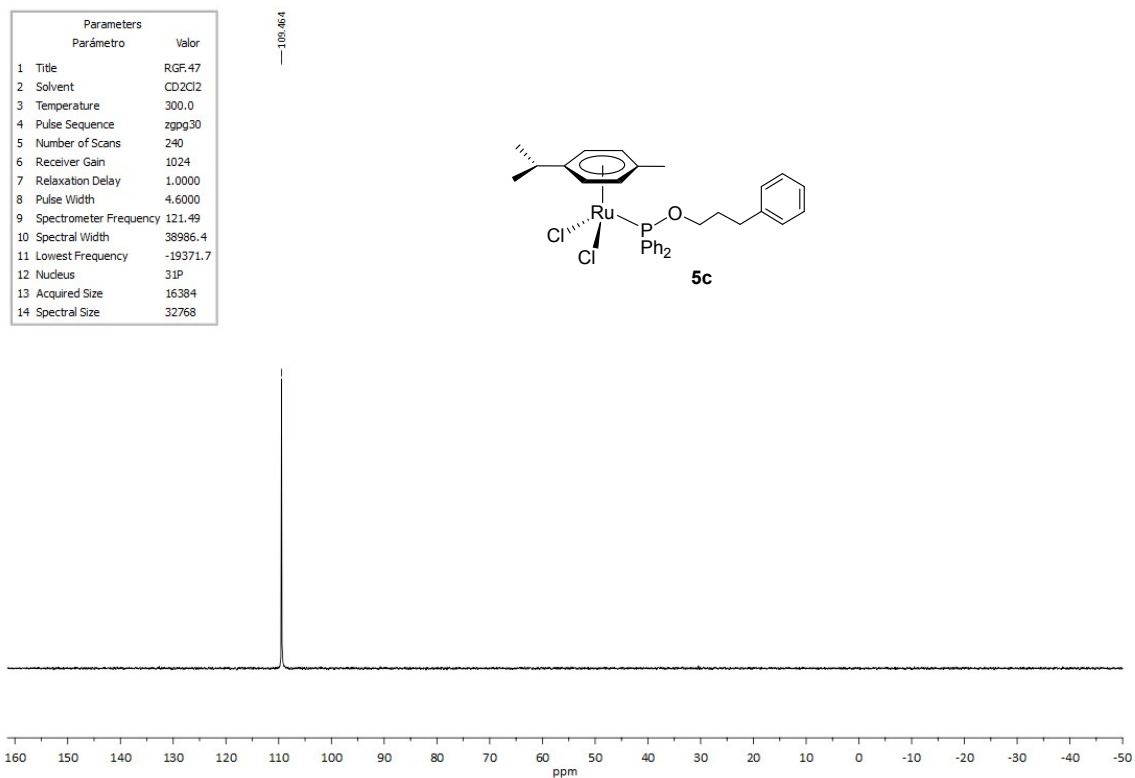

**Figure S7:**  $^{31}\text{P}\{^1\text{H}\}$  NMR spectrum (121 MHz,  $\text{CD}_2\text{Cl}_2$ ) of complex **5c**.

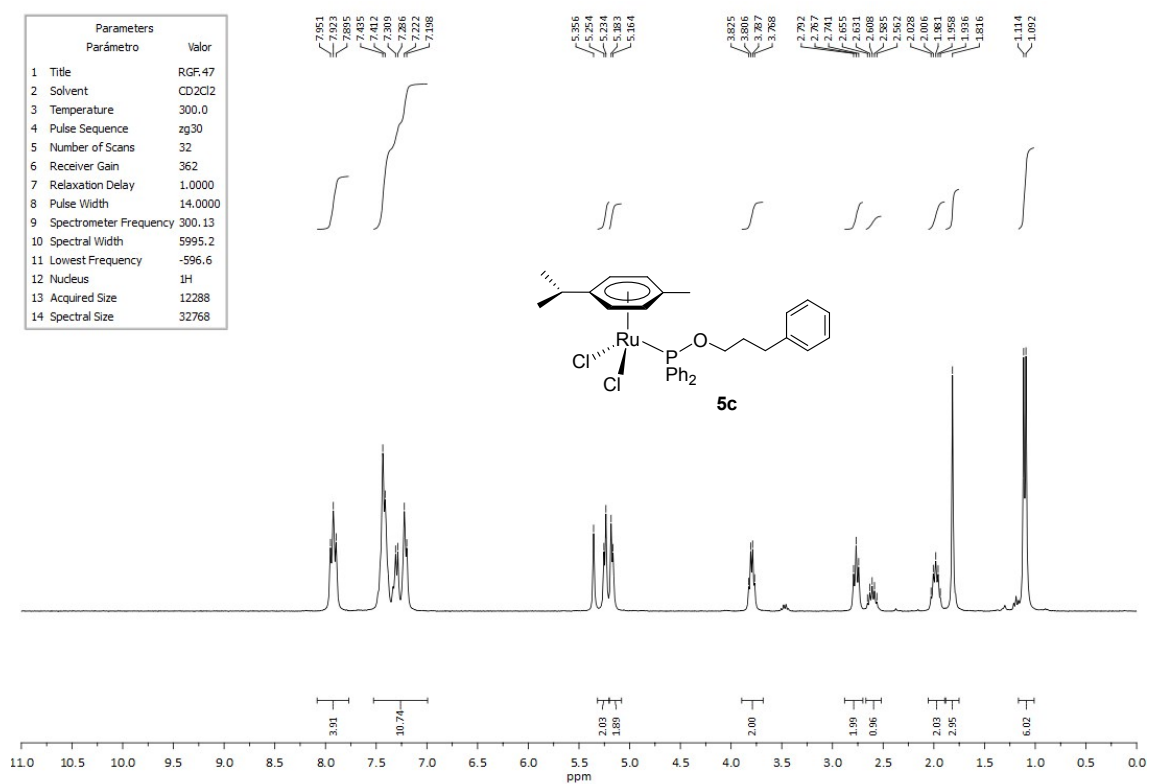

**Figure S8:**  $^1\text{H}$  NMR spectrum (300 MHz,  $\text{CD}_2\text{Cl}_2$ ) of complex **5c**.

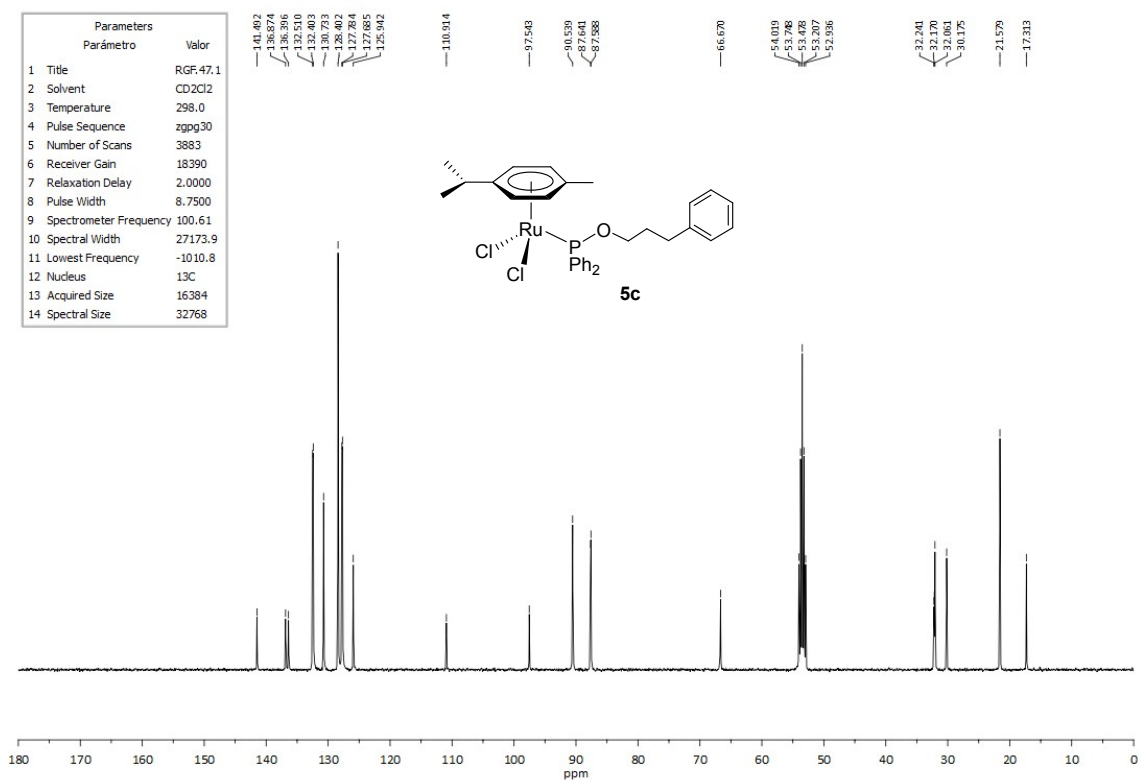

**Figure S9:**  $^{13}\text{C}\{^1\text{H}\}$  NMR spectrum (100 MHz,  $\text{CD}_2\text{Cl}_2$ ) of complex **5c**.

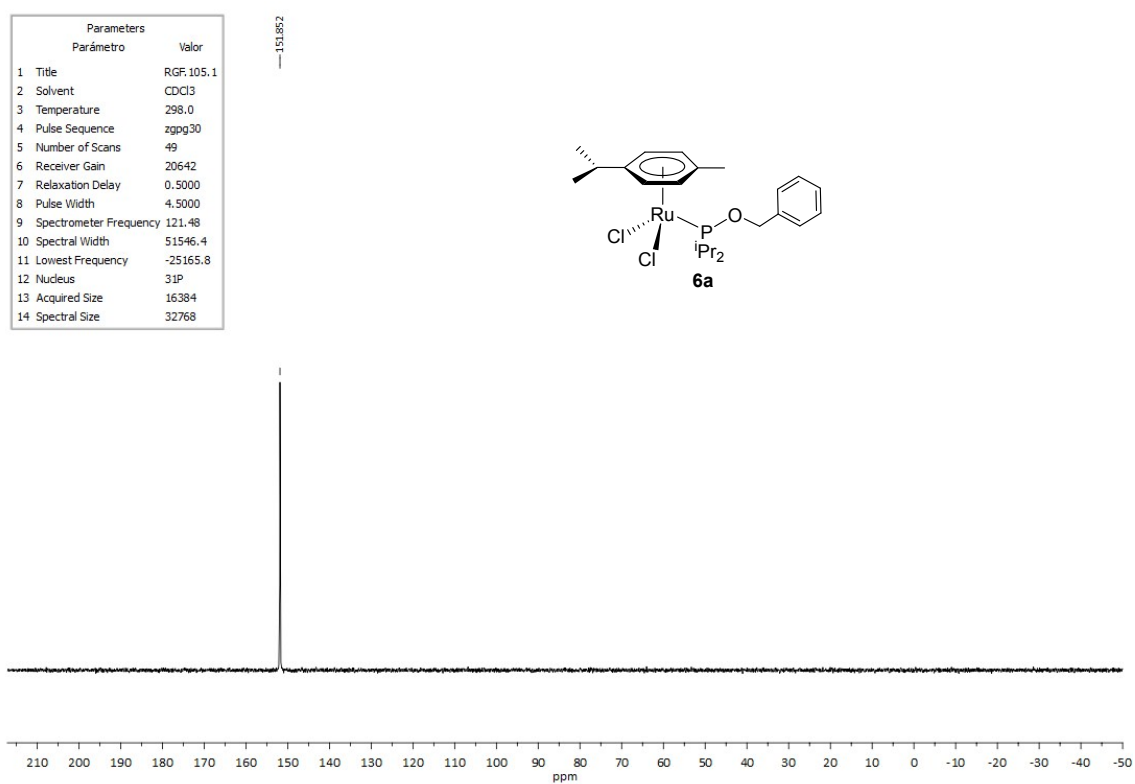

**Figure S10:**  $^{31}\text{P}\{^1\text{H}\}$  NMR spectrum (121 MHz,  $\text{CDCl}_3$ ) of complex **6a**.

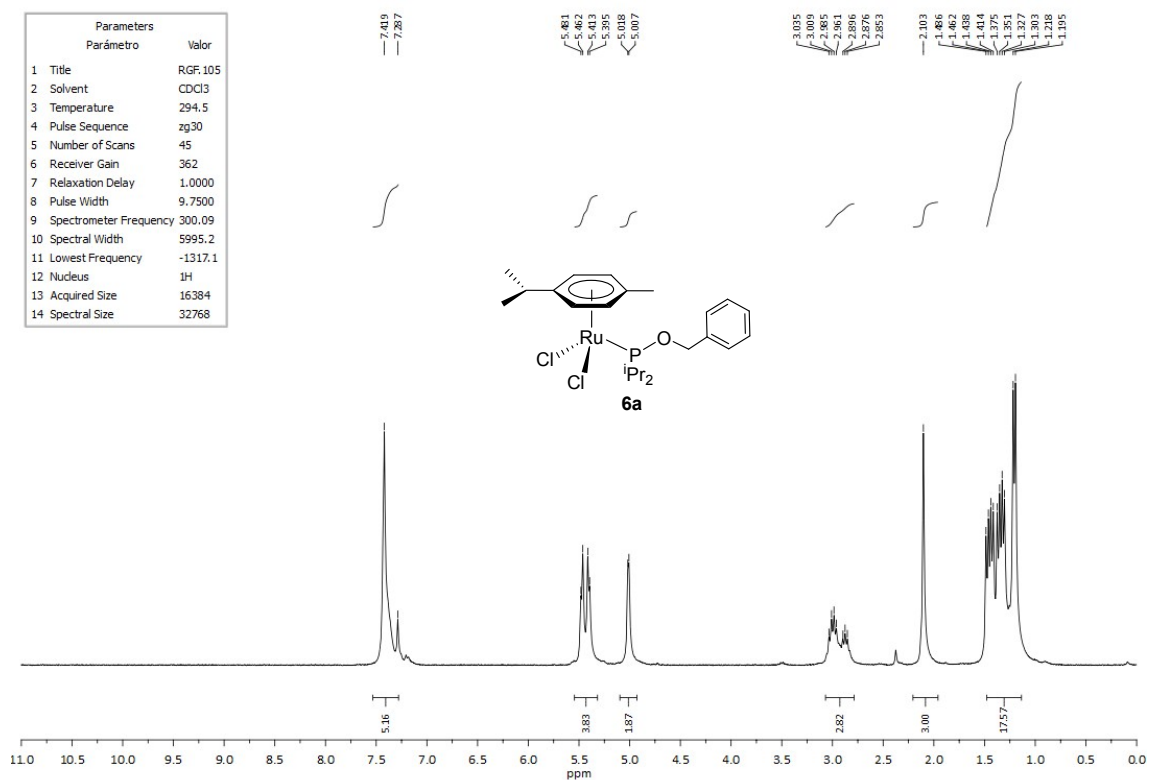

**Figure S11:**  $^1\text{H}$  NMR spectrum (300 MHz,  $\text{CDCl}_3$ ) of complex **6a**.

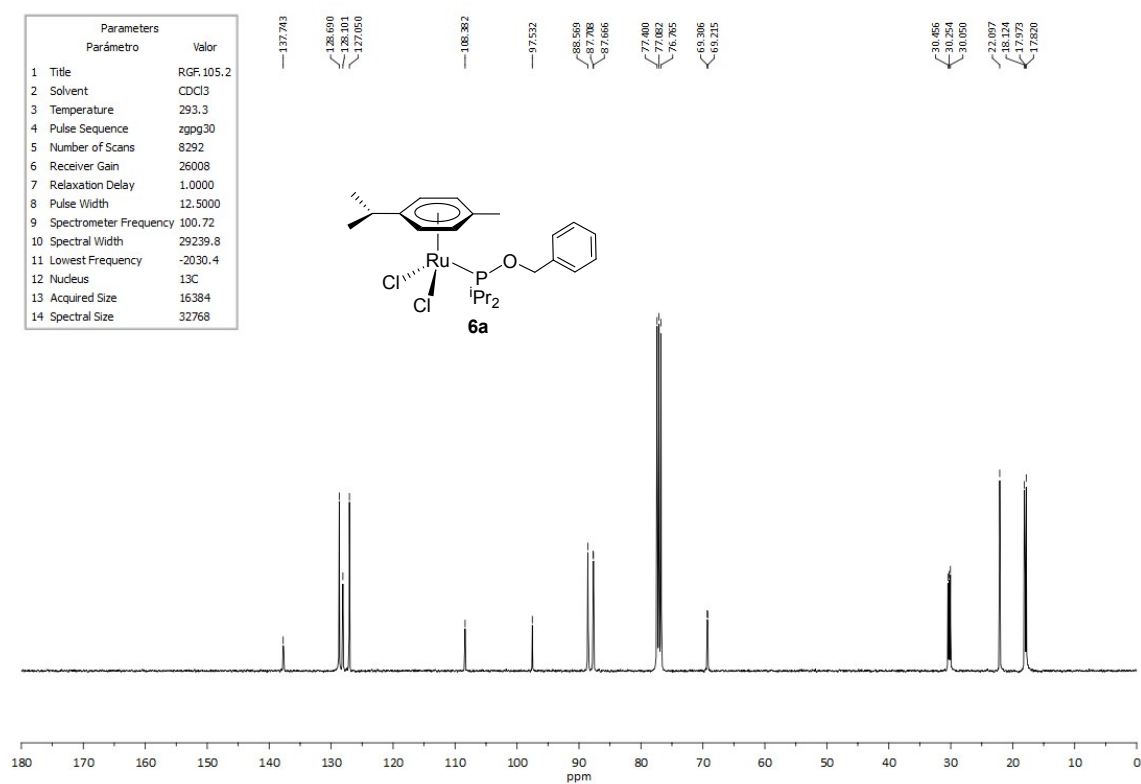

**Figure S12:**  $^{13}\text{C}\{^1\text{H}\}$  NMR spectrum (100 MHz,  $\text{CDCl}_3$ ) of complex **6a**.

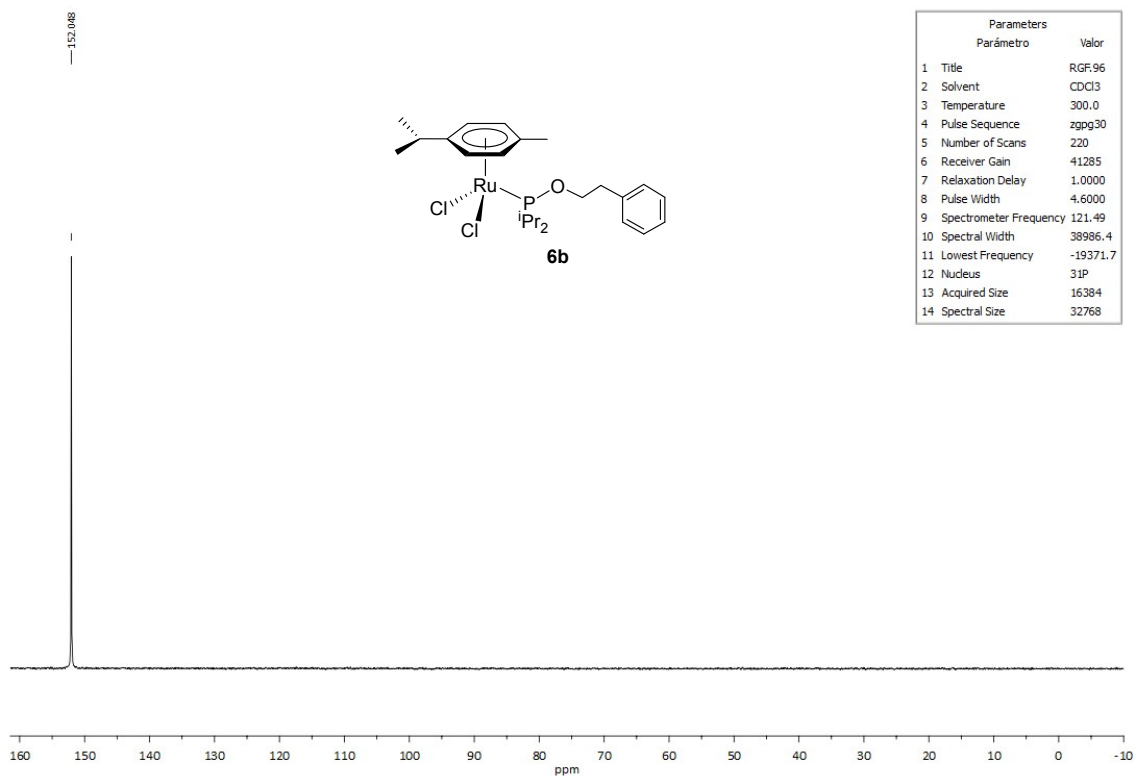

Figure S13:  $^{31}\text{P}\{^1\text{H}\}$  NMR spectrum (121 MHz,  $\text{CDCl}_3$ ) of complex **6b**.

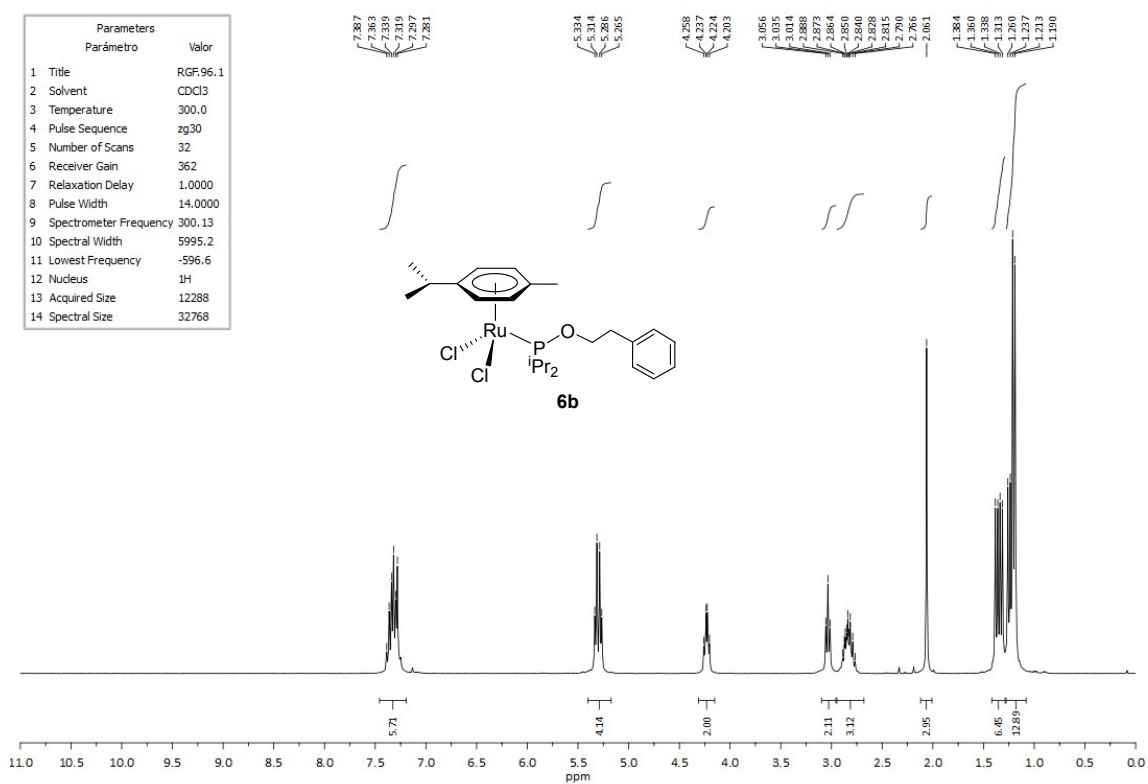

Figure S14:  $^1\text{H}$  NMR spectrum (300 MHz,  $\text{CDCl}_3$ ) of complex **6b**.



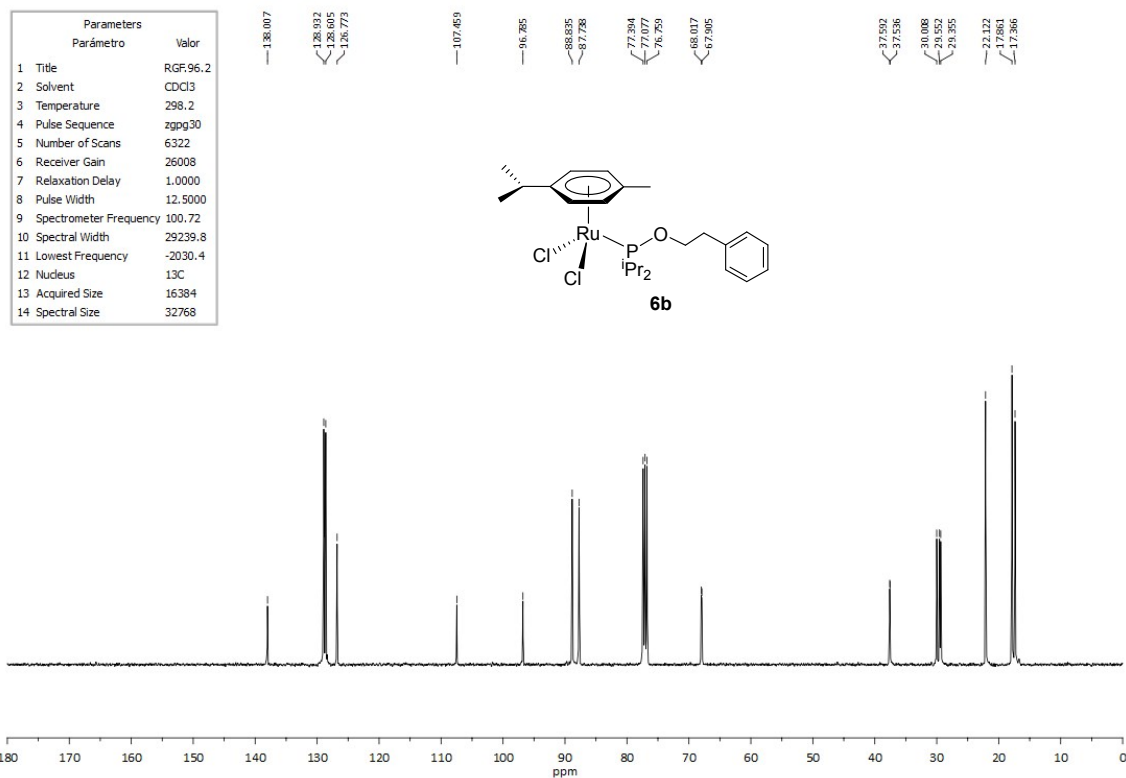

**Figure S15:**  $^{13}\text{C}\{^1\text{H}\}$  NMR spectrum (100 MHz,  $\text{CDCl}_3$ ) of complex **6b**.

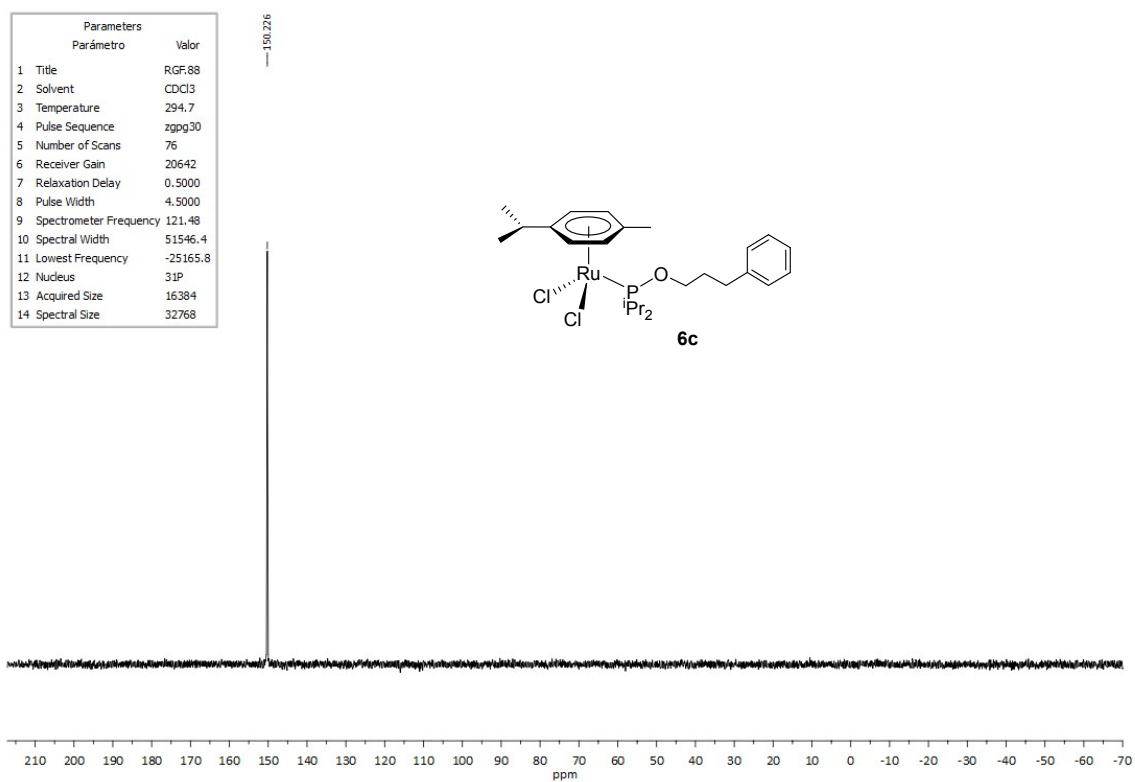

**Figure S16:**  $^{31}\text{P}\{^1\text{H}\}$  NMR spectrum (121 MHz,  $\text{CDCl}_3$ ) of complex **6c**.

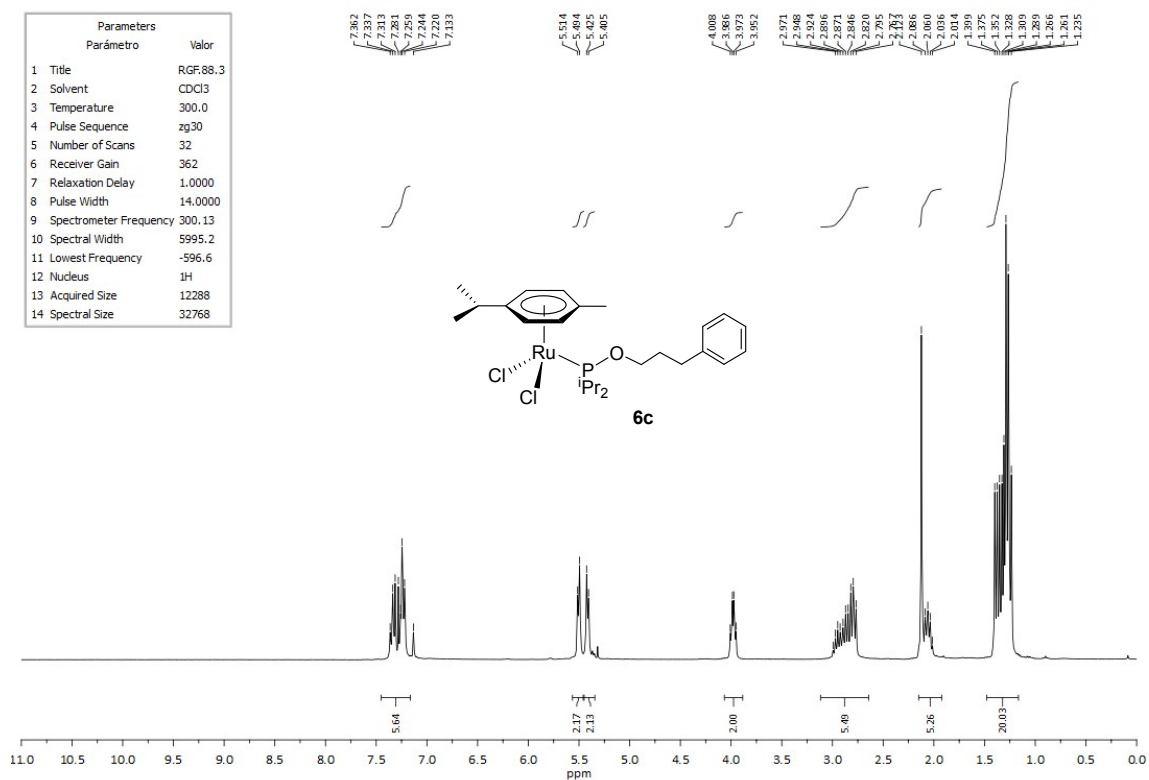

**Figure S17:** <sup>1</sup>H NMR spectrum (300 MHz, CDCl<sub>3</sub>) of complex **6c**.

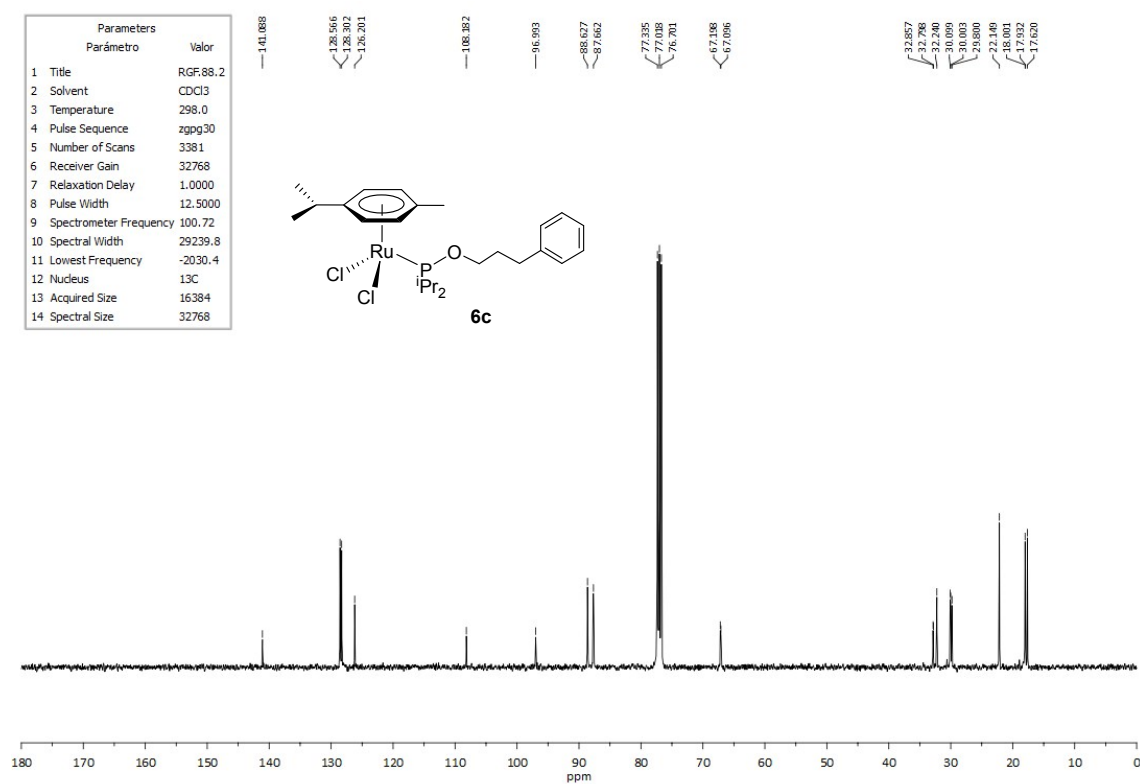

**Figure S18:** <sup>13</sup>C{<sup>1</sup>H} NMR spectrum (100 MHz, CDCl<sub>3</sub>) of complex **6c**.

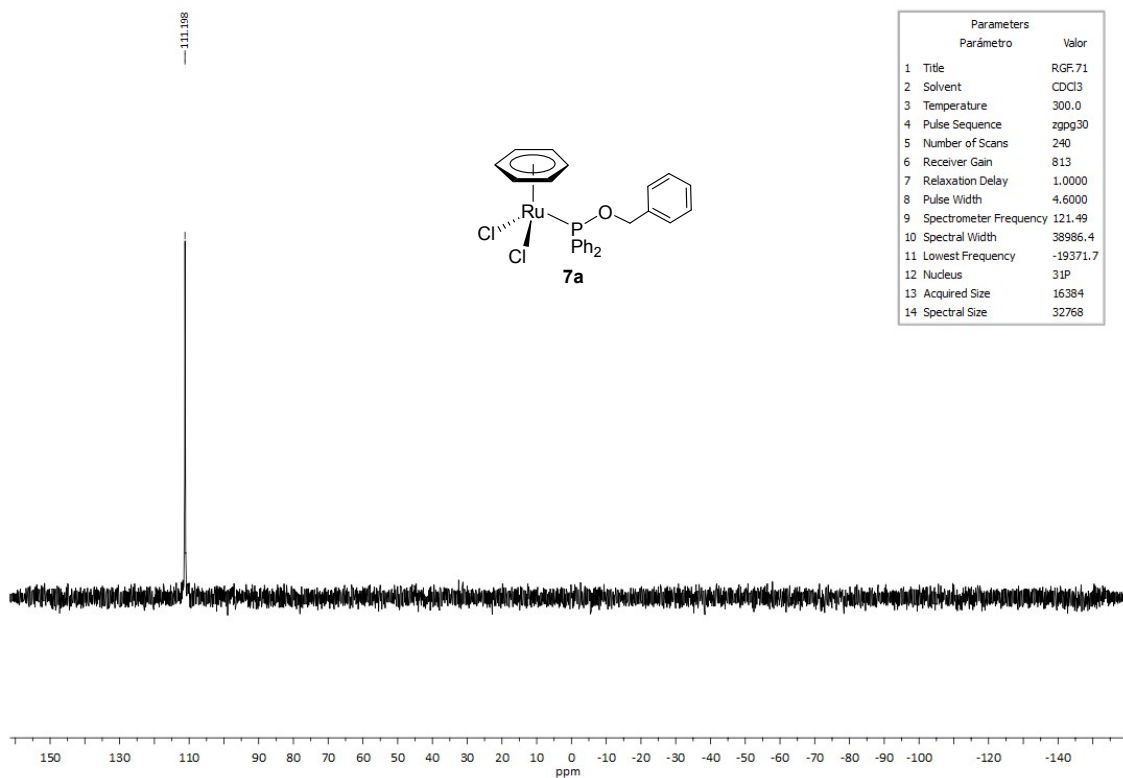

**Figure S19:**  $^{31}\text{P}\{^1\text{H}\}$  NMR spectrum (121 MHz,  $\text{CDCl}_3$ ) of complex **7a**.

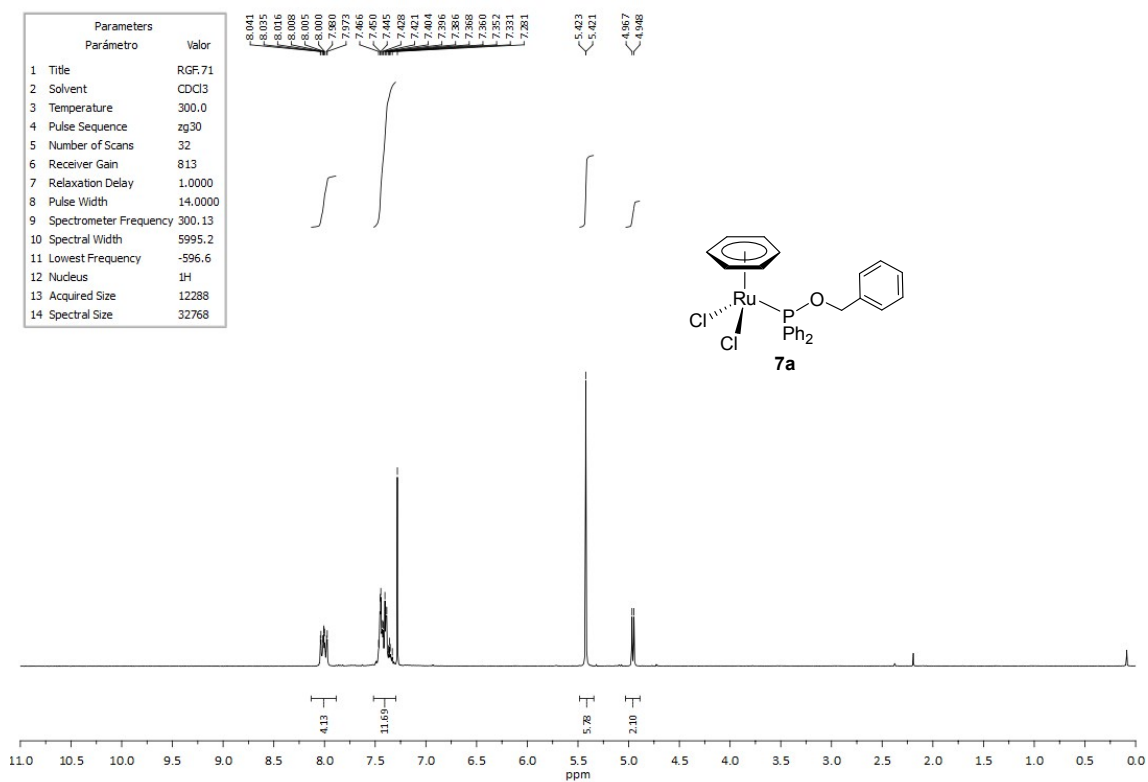

**Figure S20:**  $^1\text{H}$  NMR spectrum (300 MHz,  $\text{CDCl}_3$ ) of complex **7a**.

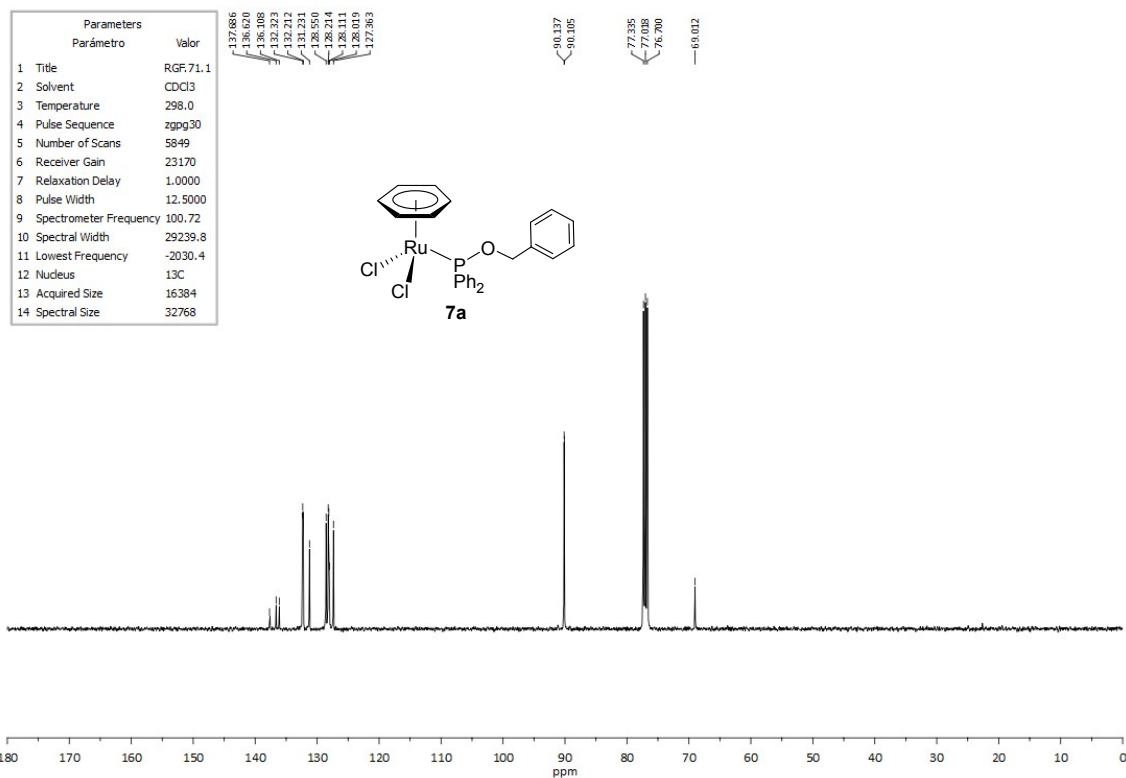

**Figure S21:** <sup>13</sup>C{<sup>1</sup>H} NMR spectrum (100 MHz, CDCl<sub>3</sub>) of complex **7a**.

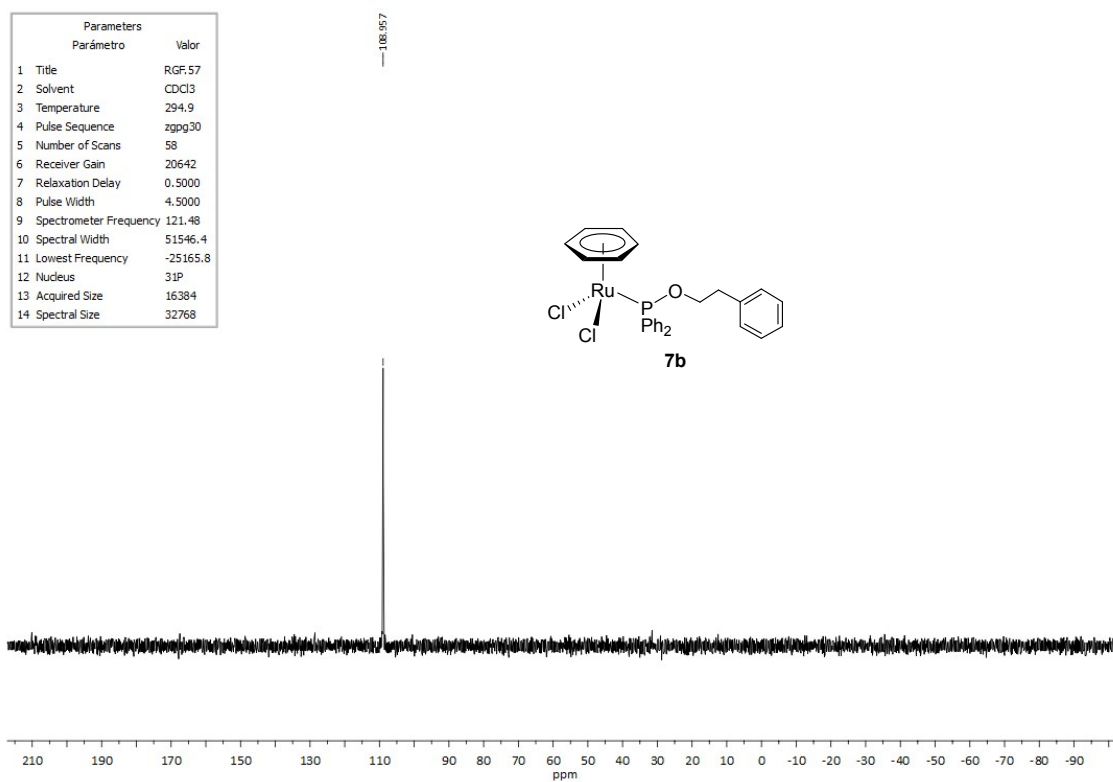

**Figure S22:** <sup>31</sup>P{<sup>1</sup>H} NMR spectrum (121 MHz, CD<sub>2</sub>Cl<sub>2</sub>) of complex **7b**.

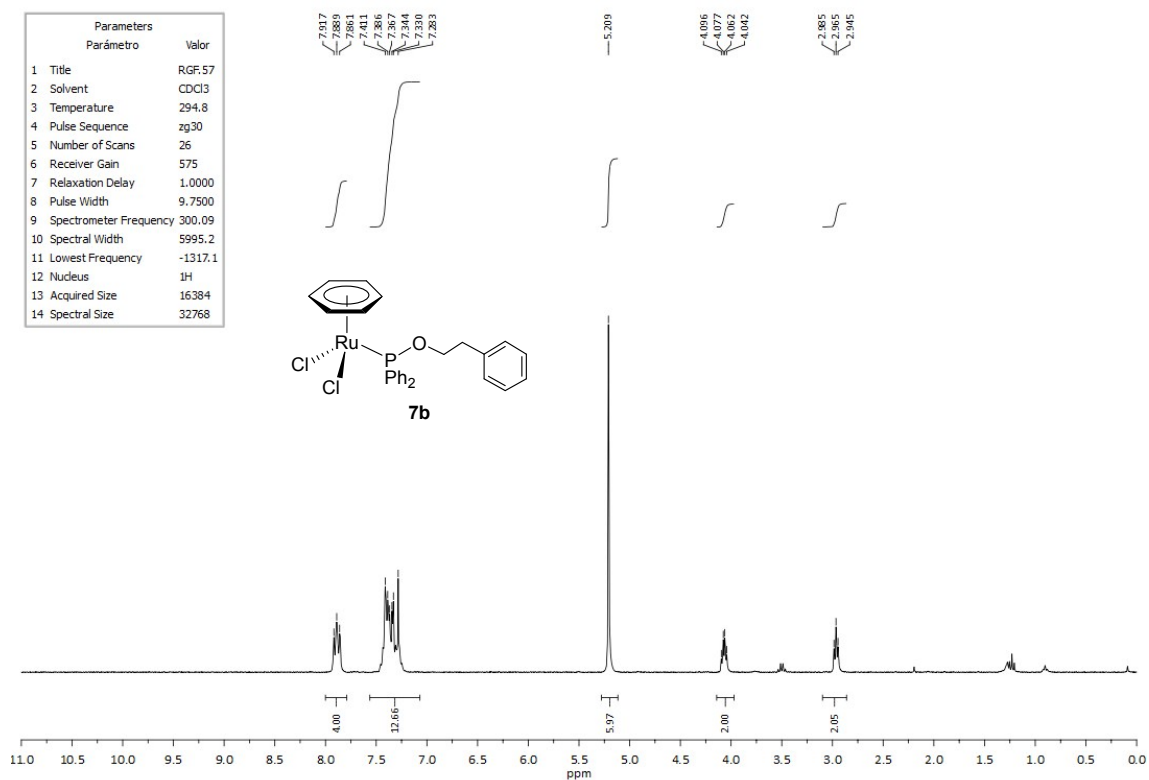

**Figure S23:**  $^1\text{H}$  NMR spectrum (300 MHz,  $\text{CD}_2\text{Cl}_2$ ) of complex **7b**.

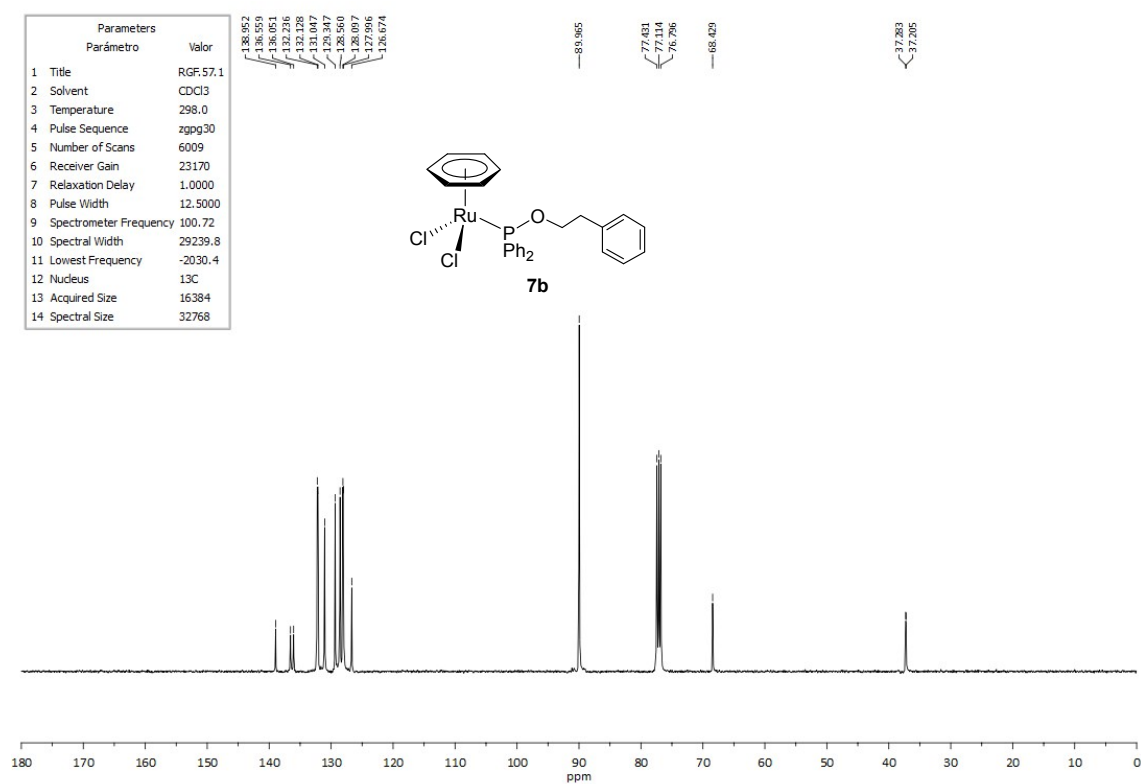

**Figure S24:**  $^{13}\text{C}\{^1\text{H}\}$  NMR spectrum (100 MHz,  $\text{CD}_2\text{Cl}_2$ ) of complex **7b**.

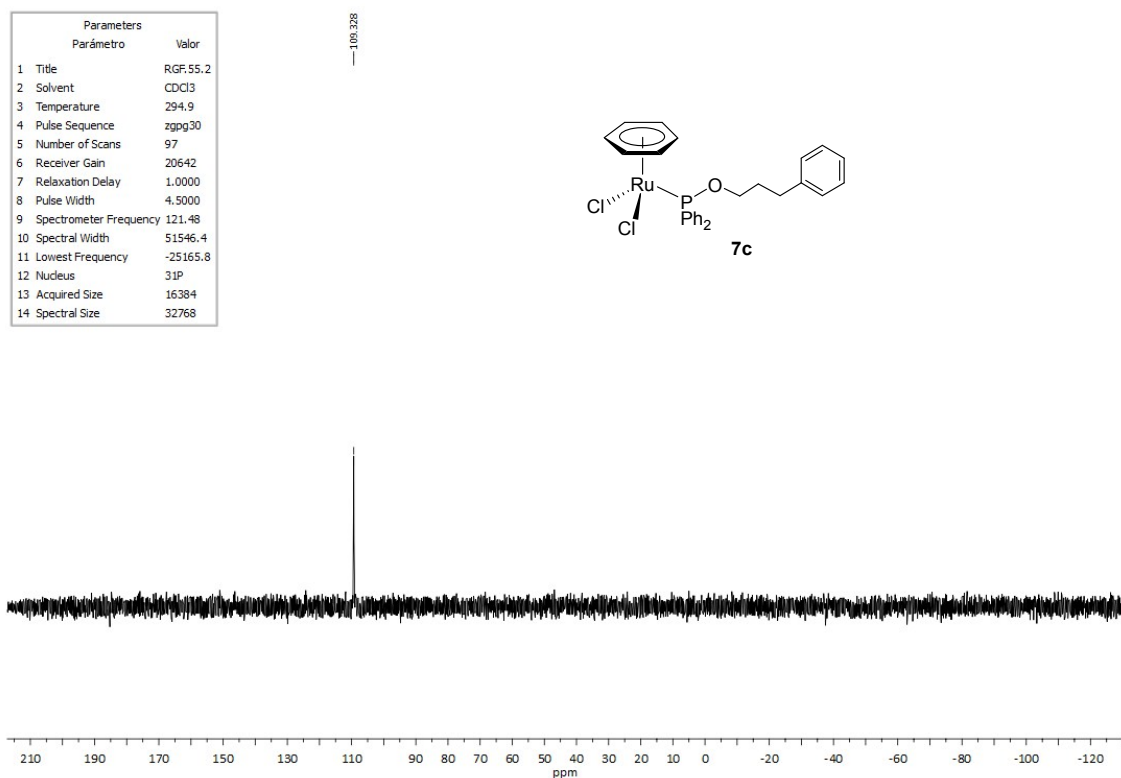

**Figure S25:**  $^{31}\text{P}\{^1\text{H}\}$  NMR spectrum (121 MHz,  $\text{CD}_2\text{Cl}_2$ ) of complex **7c**.

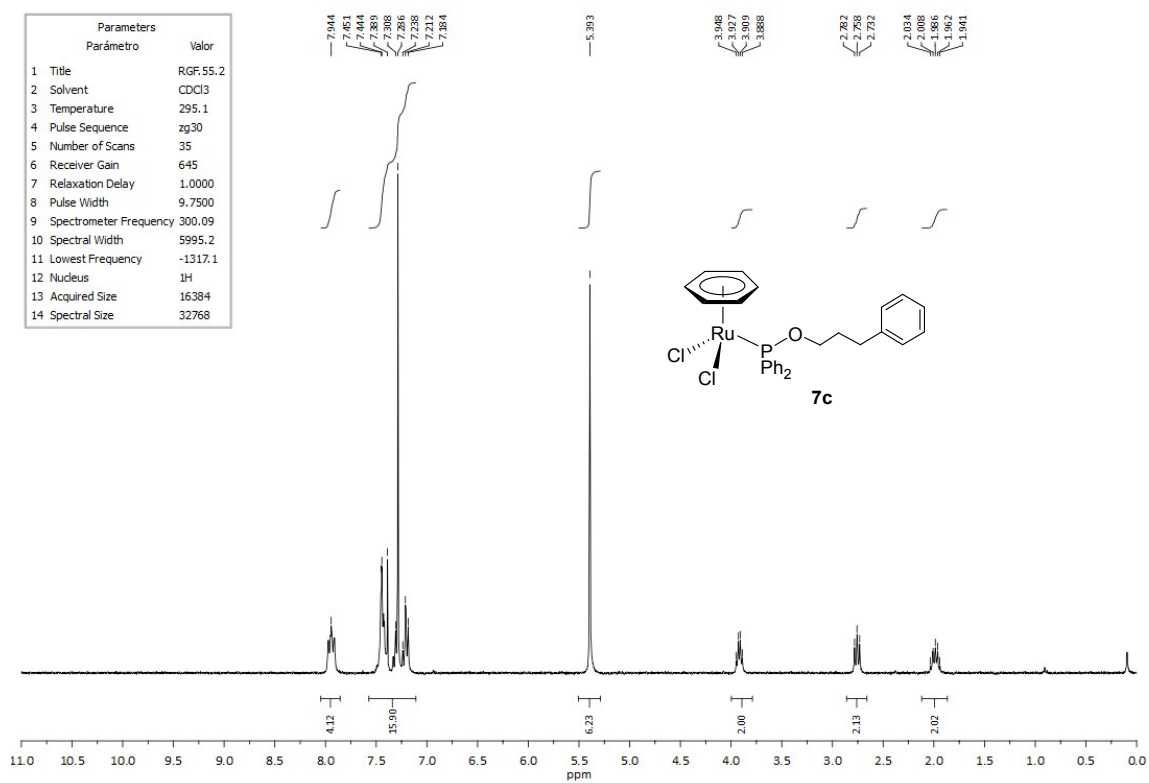

**Figure S26:**  $^1\text{H}$  NMR spectrum (300 MHz,  $\text{CD}_2\text{Cl}_2$ ) of complex **7c**.

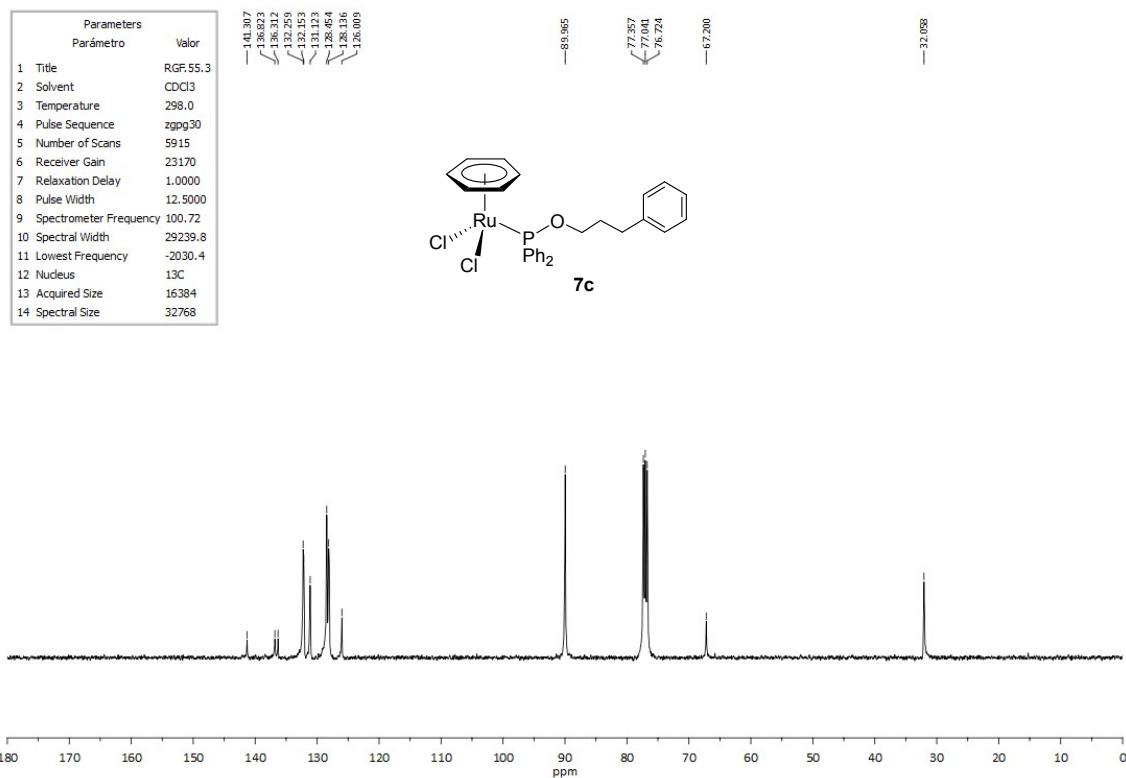

**Figure S27:**  $^{13}\text{C}\{^1\text{H}\}$  NMR spectrum (100 MHz,  $\text{CD}_2\text{Cl}_2$ ) of complex **7c**.

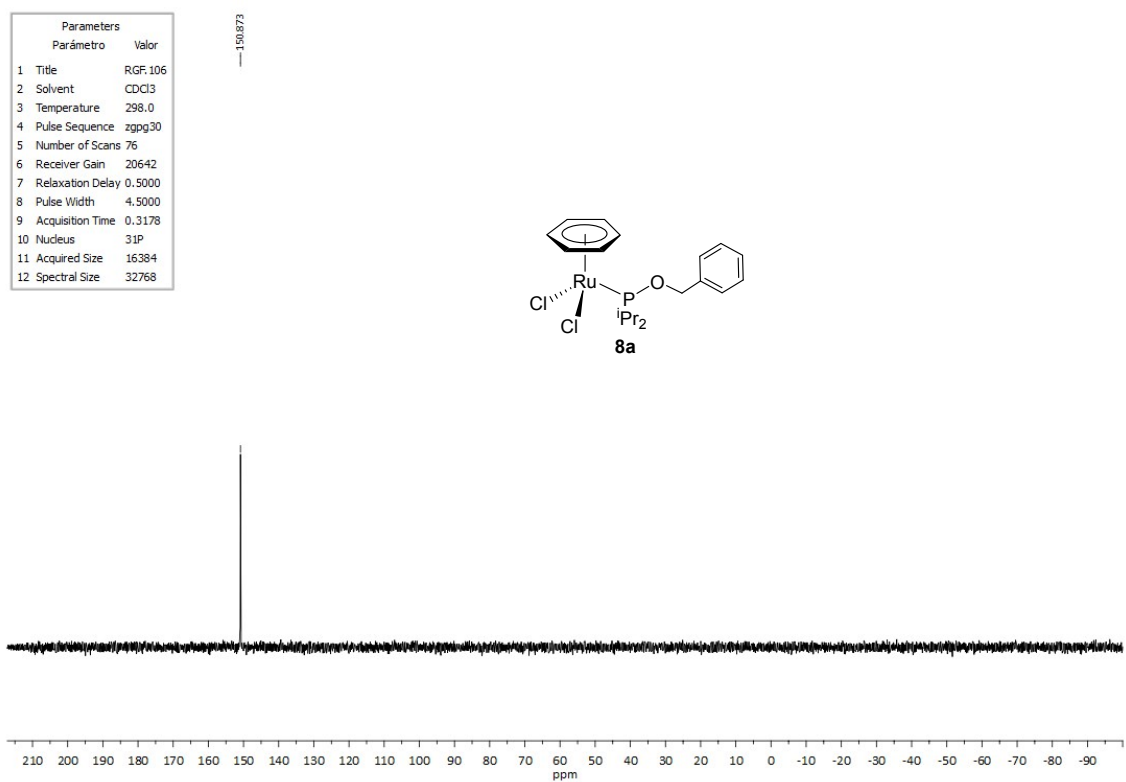

**Figure S28:**  $^{31}\text{P}\{^1\text{H}\}$  NMR spectrum (121 MHz,  $\text{CDCl}_3$ ) of complex **8a**.

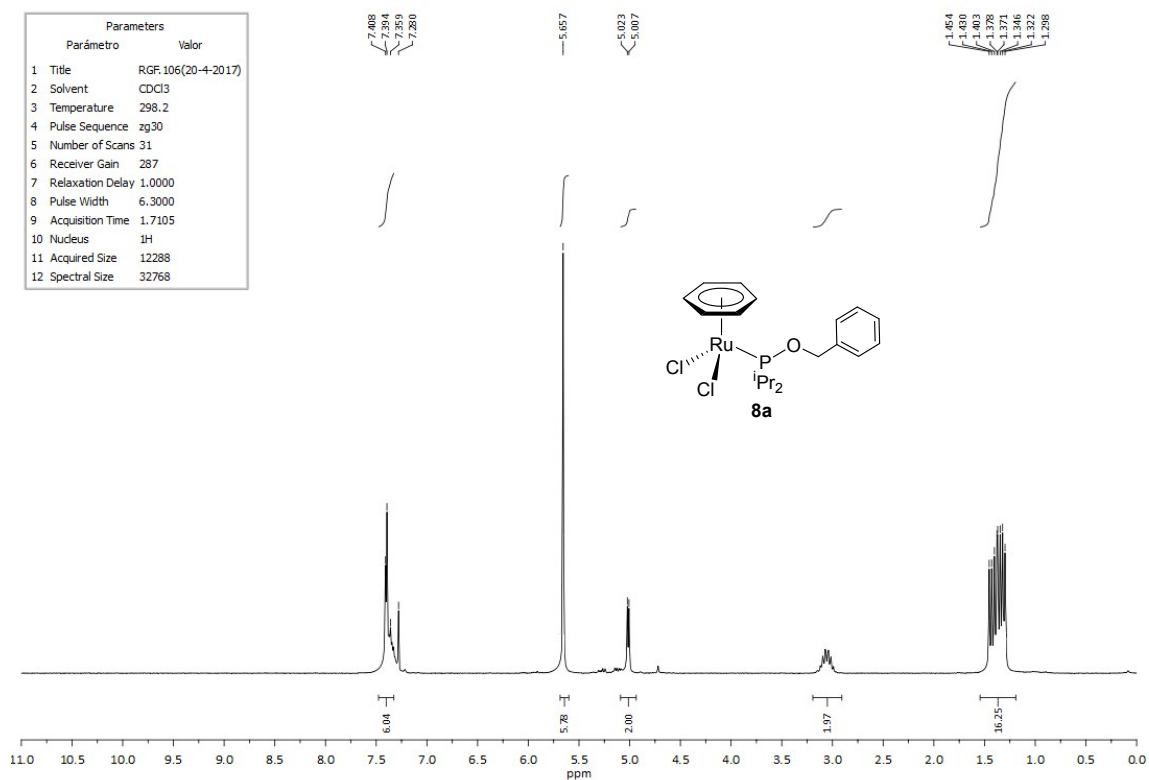

**Figure S29:**  $^1\text{H}$  NMR spectrum (300 MHz,  $\text{CDCl}_3$ ) of complex **8a**.

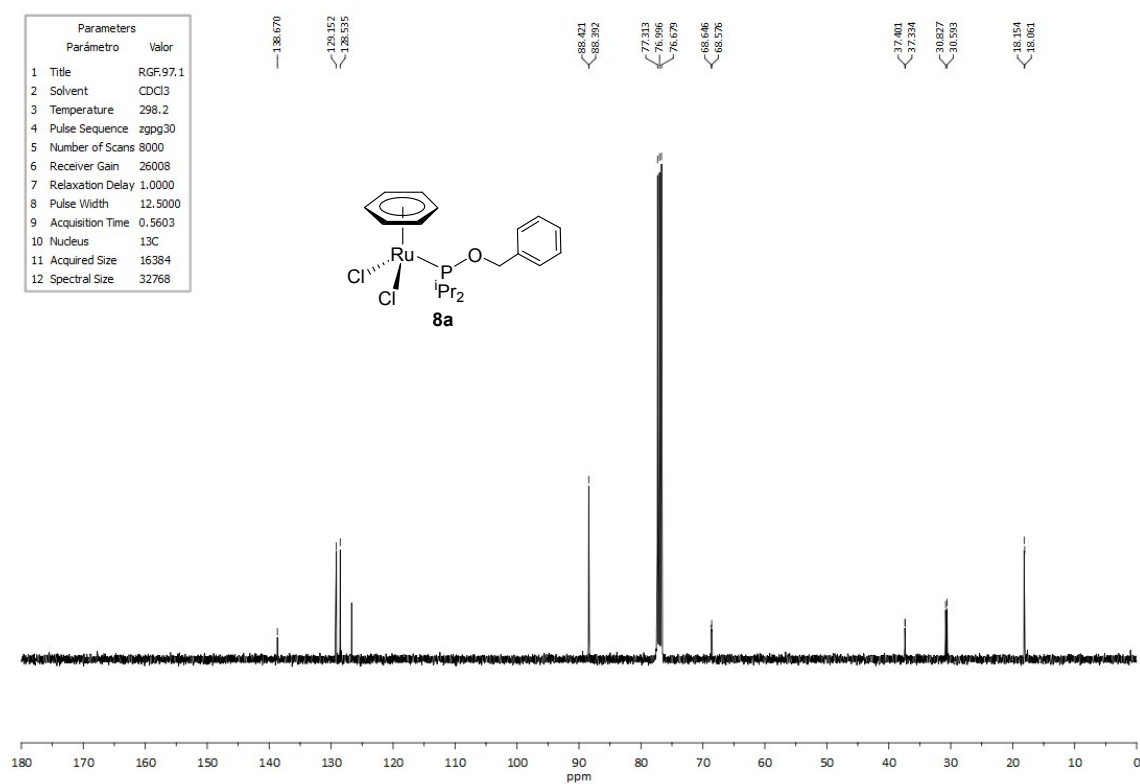

**Figure S30:**  $^{13}\text{C}\{^1\text{H}\}$  NMR spectrum (100 MHz,  $\text{CDCl}_3$ ) of complex **8a**.



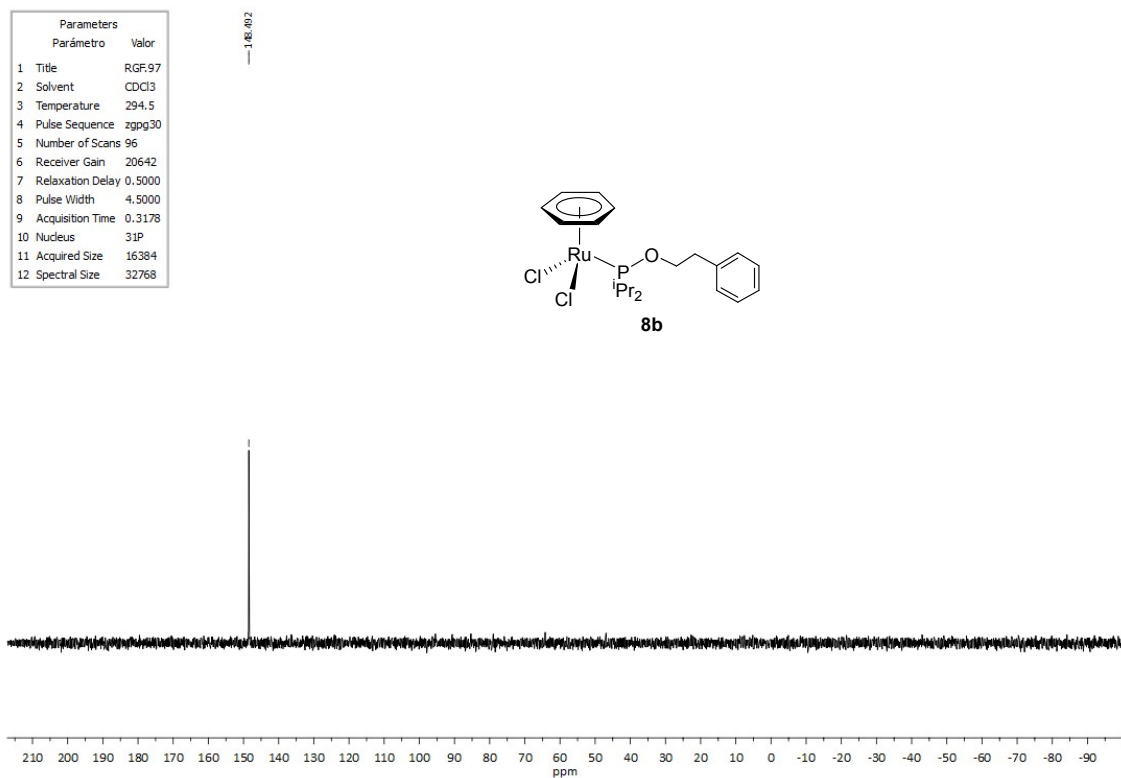

**Figure S31:**  $^{31}\text{P}\{^1\text{H}\}$  NMR spectrum (121 MHz,  $\text{CDCl}_3$ ) of complex **8b**.

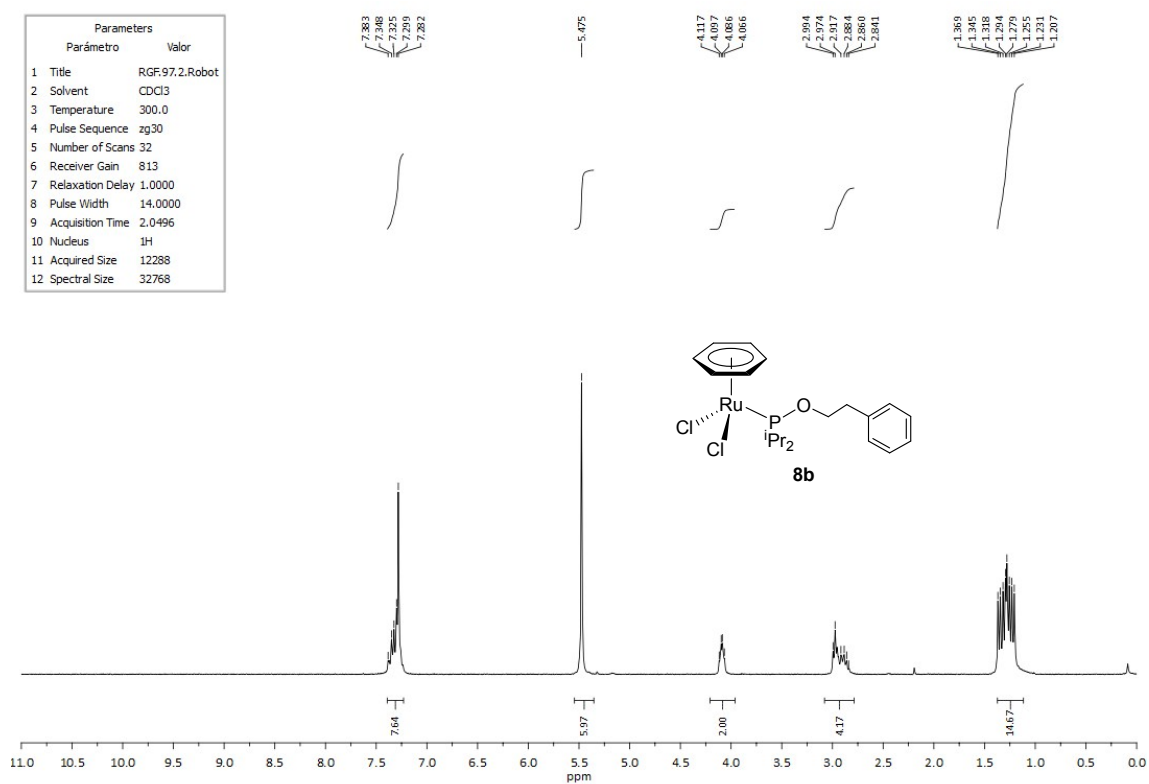

**Figure S32:**  $^1\text{H}$  NMR spectrum (300 MHz,  $\text{CDCl}_3$ ) of complex **8b**.

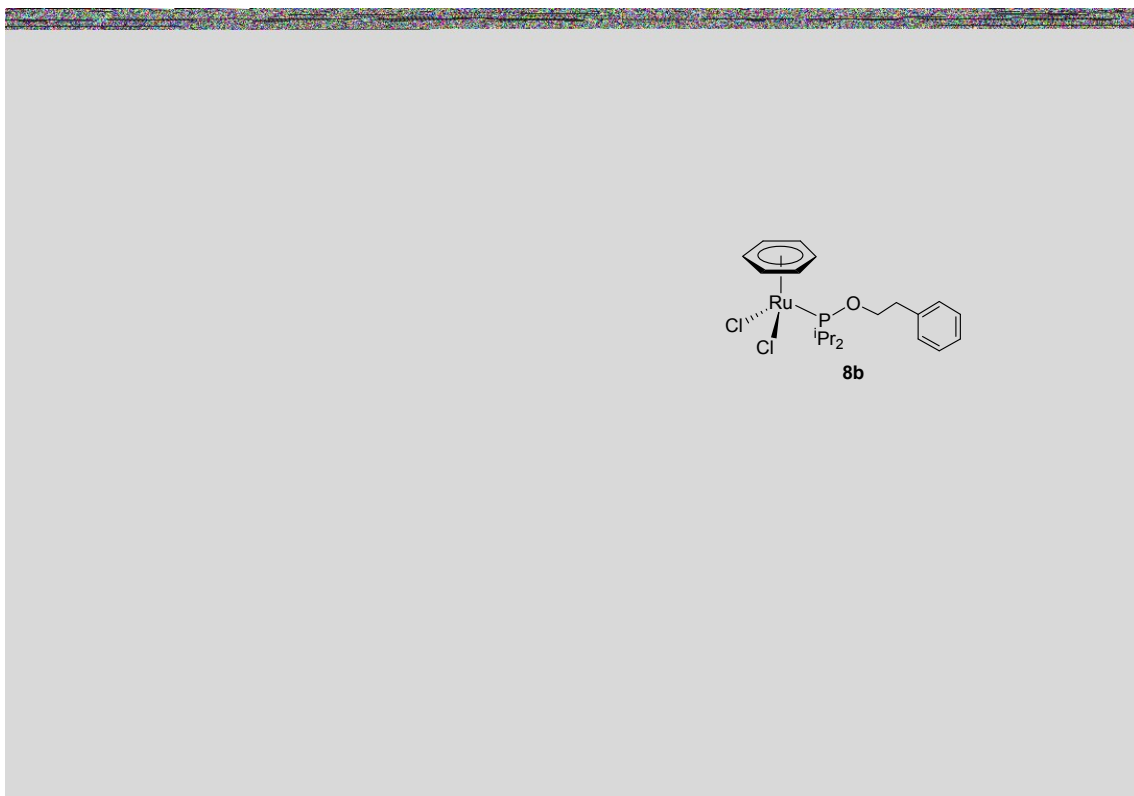

**Figure S33:**  $^{13}\text{C}\{^1\text{H}\}$  NMR spectrum (100 MHz,  $\text{CDCl}_3$ ) of complex **8b**.

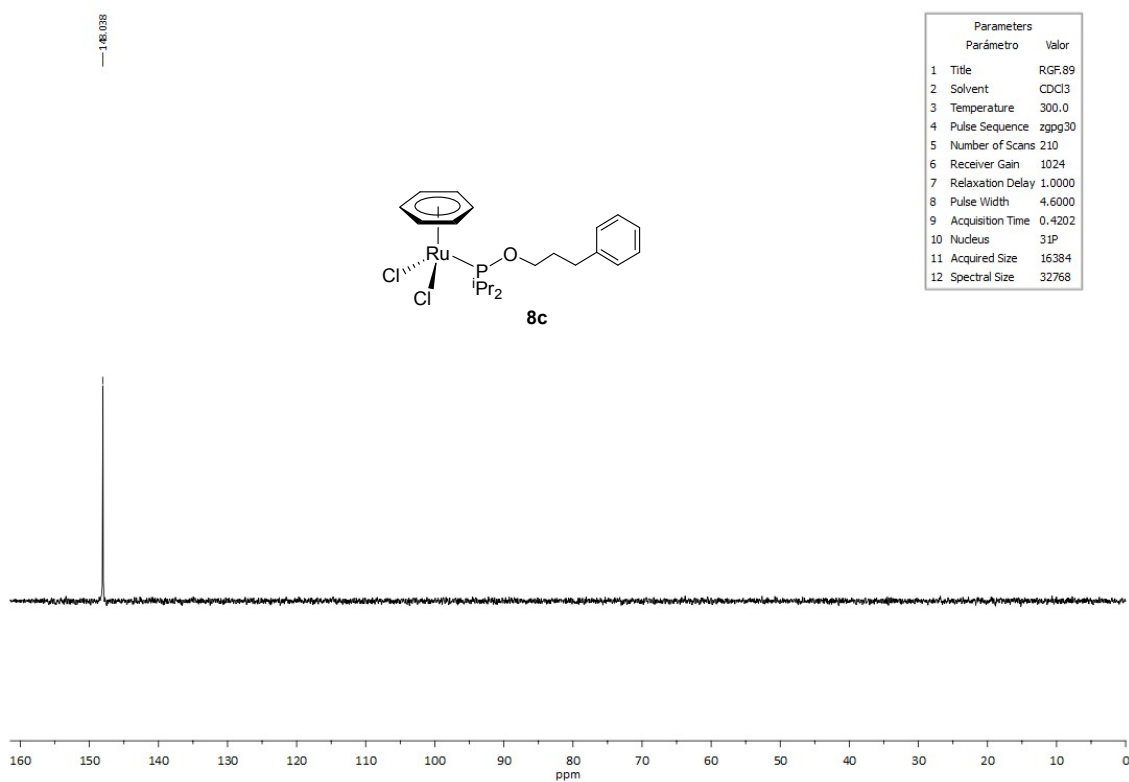

**Figure S34:**  $^{31}\text{P}\{^1\text{H}\}$  NMR spectrum (121 MHz,  $\text{CDCl}_3$ ) of complex **8c**.

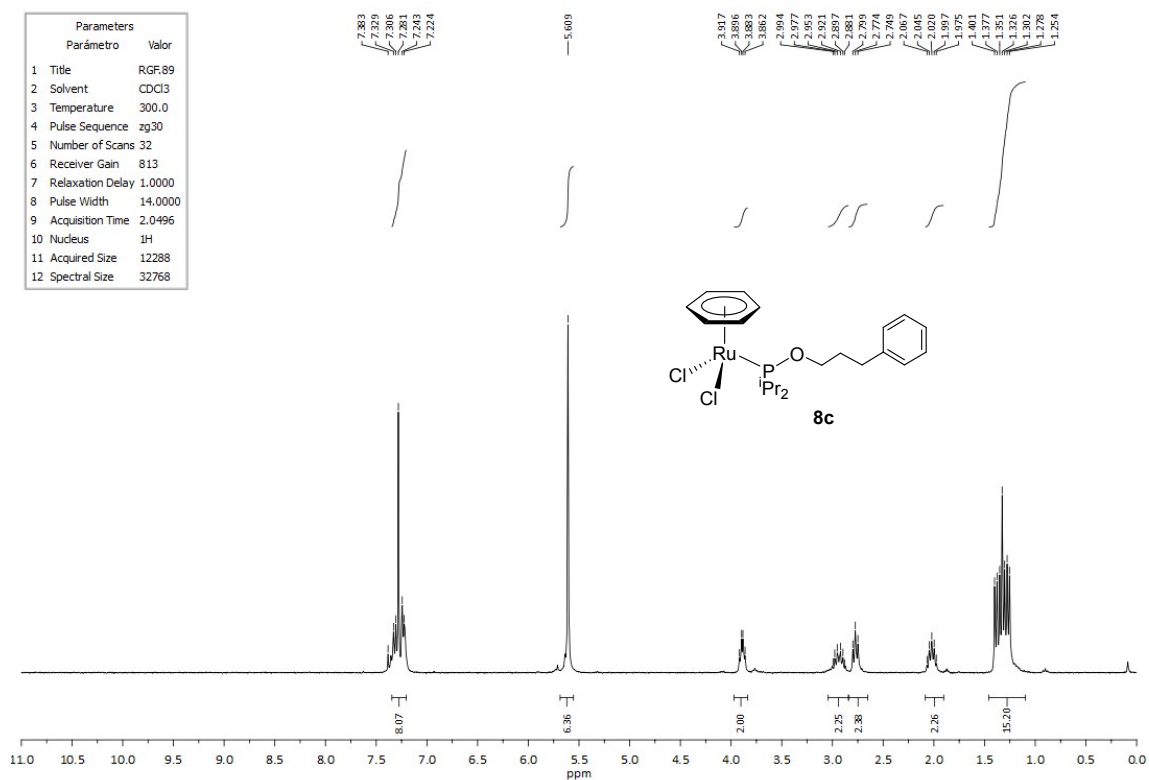

**Figure S35:** <sup>1</sup>H NMR spectrum (300 MHz, CDCl<sub>3</sub>) of complex **8c**.

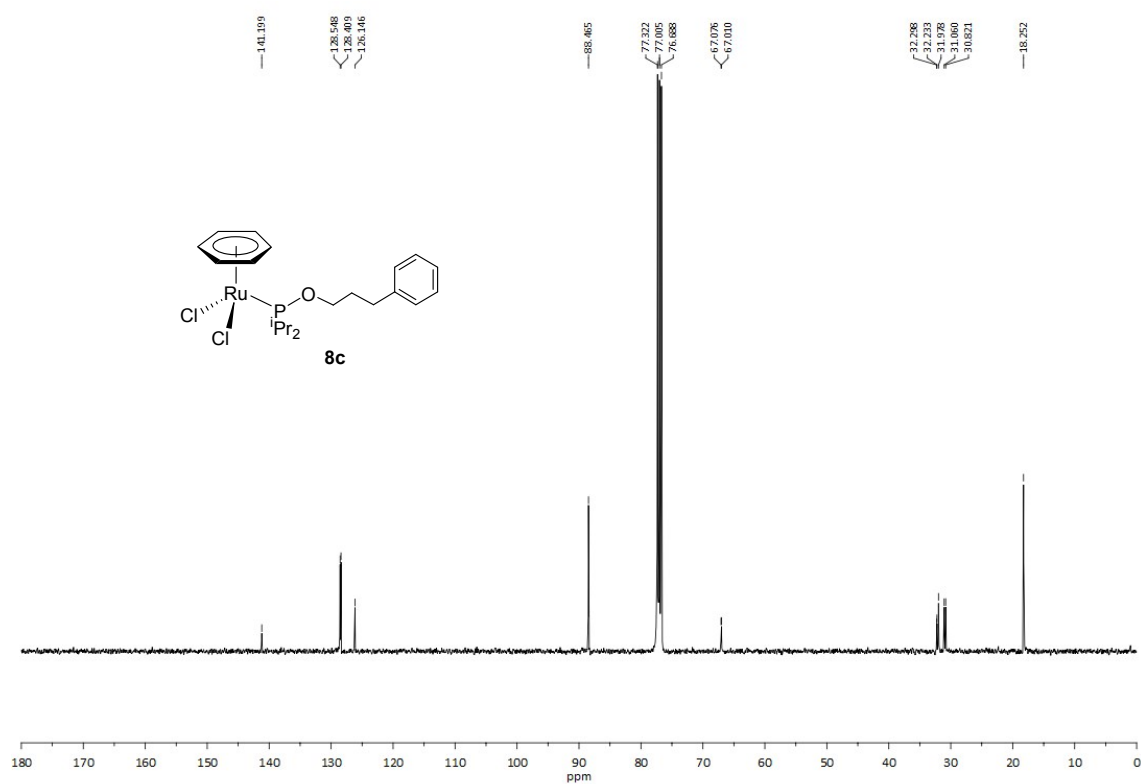

**Figure S36:** <sup>13</sup>C{<sup>1</sup>H} NMR spectrum (100 MHz, CDCl<sub>3</sub>) of complex **8c**.

## NMR spectra of the tethered complexes 9-10a-c

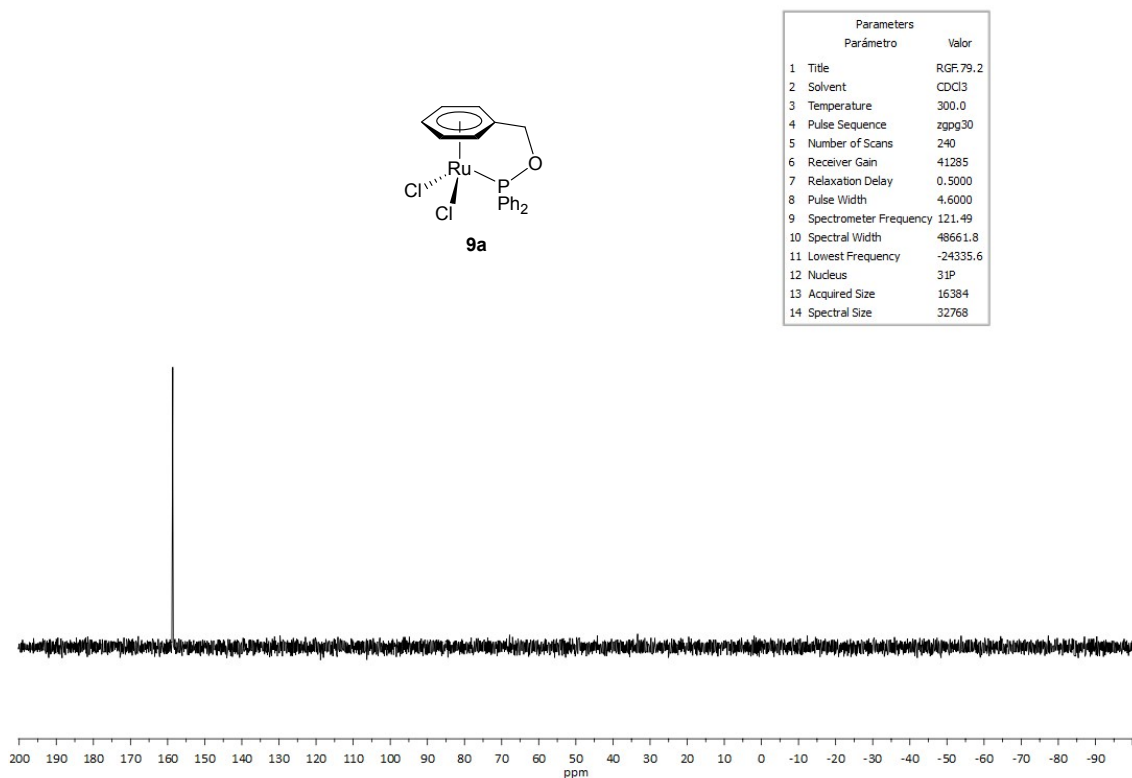

**Figure S37:** <sup>31</sup>P{<sup>1</sup>H} NMR spectrum (121 MHz, CDCl<sub>3</sub>) of complex **9a**.

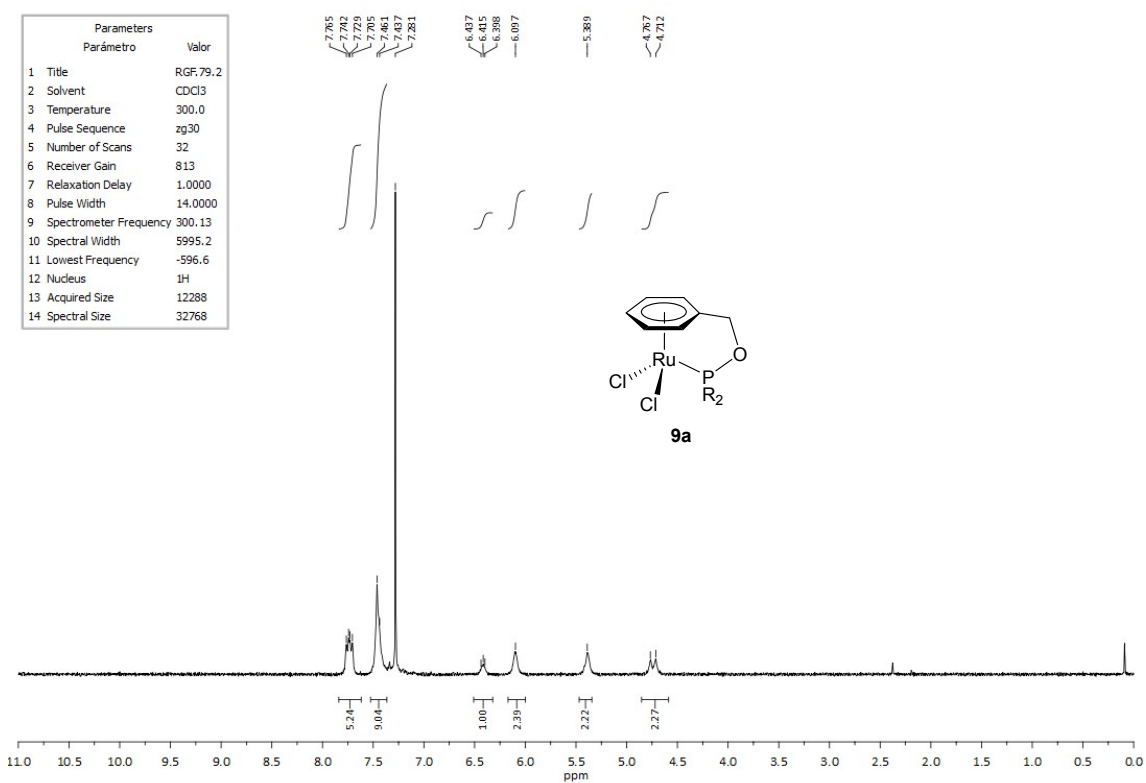

**Figure S38:** <sup>1</sup>H NMR spectrum (300 MHz, CDCl<sub>3</sub>) of complex **9a**.

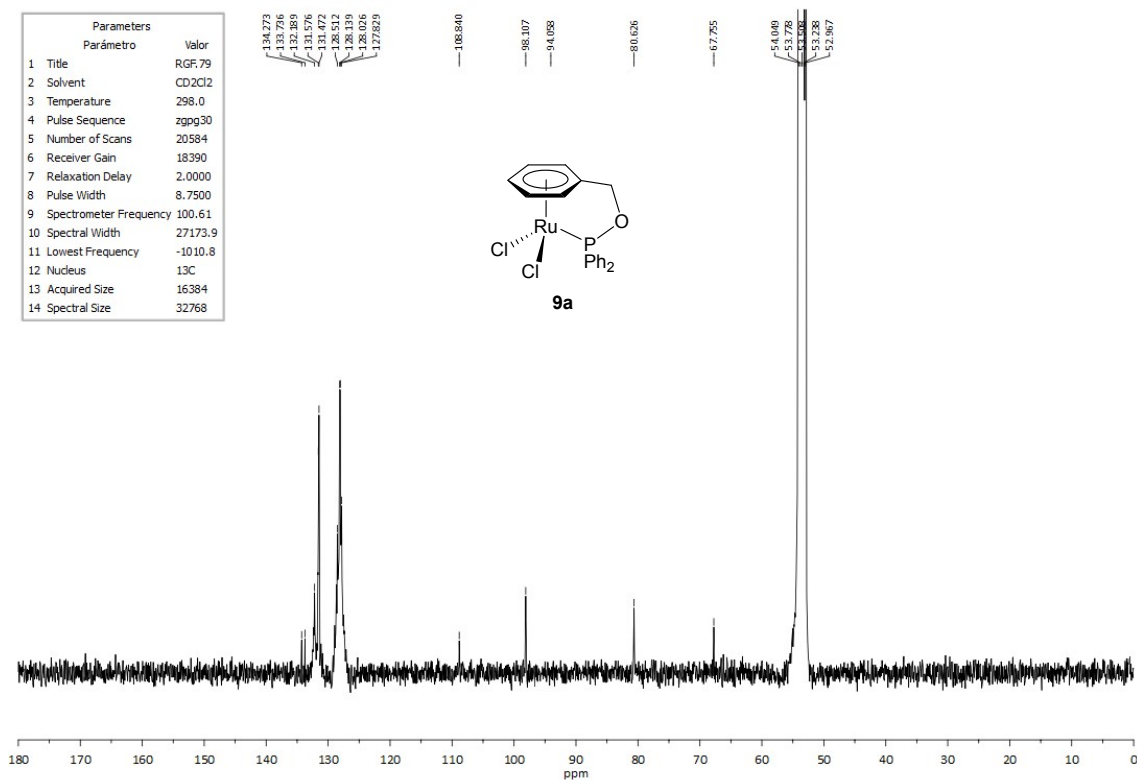

**Figure S39:** <sup>13</sup>C{<sup>1</sup>H} NMR spectrum (100 MHz, CD<sub>2</sub>Cl<sub>2</sub>) of complex **9a**.

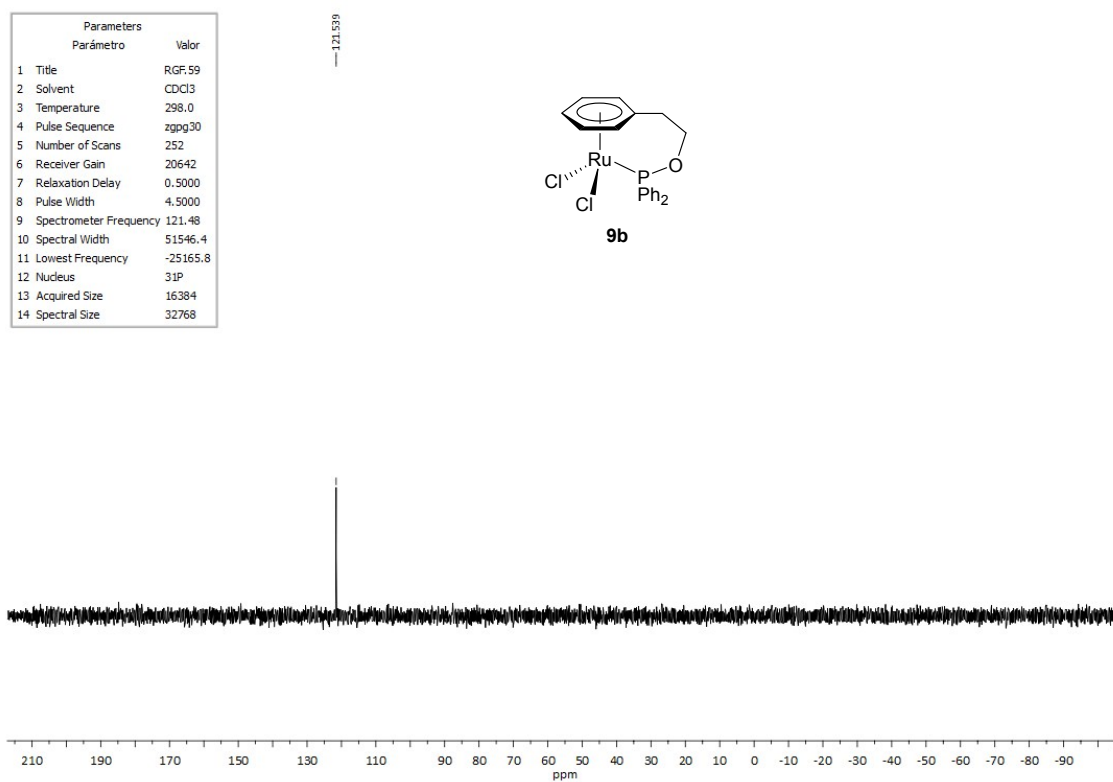

**Figure S40:** <sup>31</sup>P{<sup>1</sup>H} NMR spectrum (121 MHz, CDCl<sub>3</sub>) of complex **9b**.

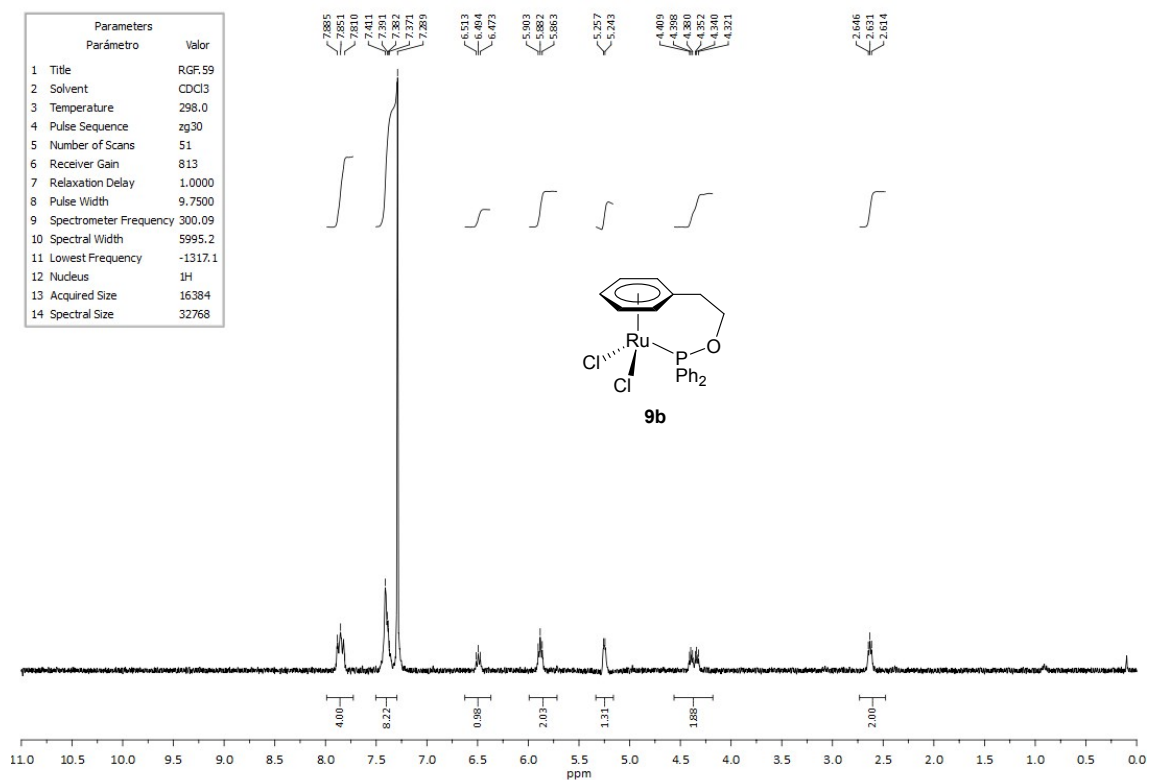

**Figure S41:**  $^1\text{H}$  NMR spectrum (300 MHz,  $\text{CDCl}_3$ ) of complex **9b**.

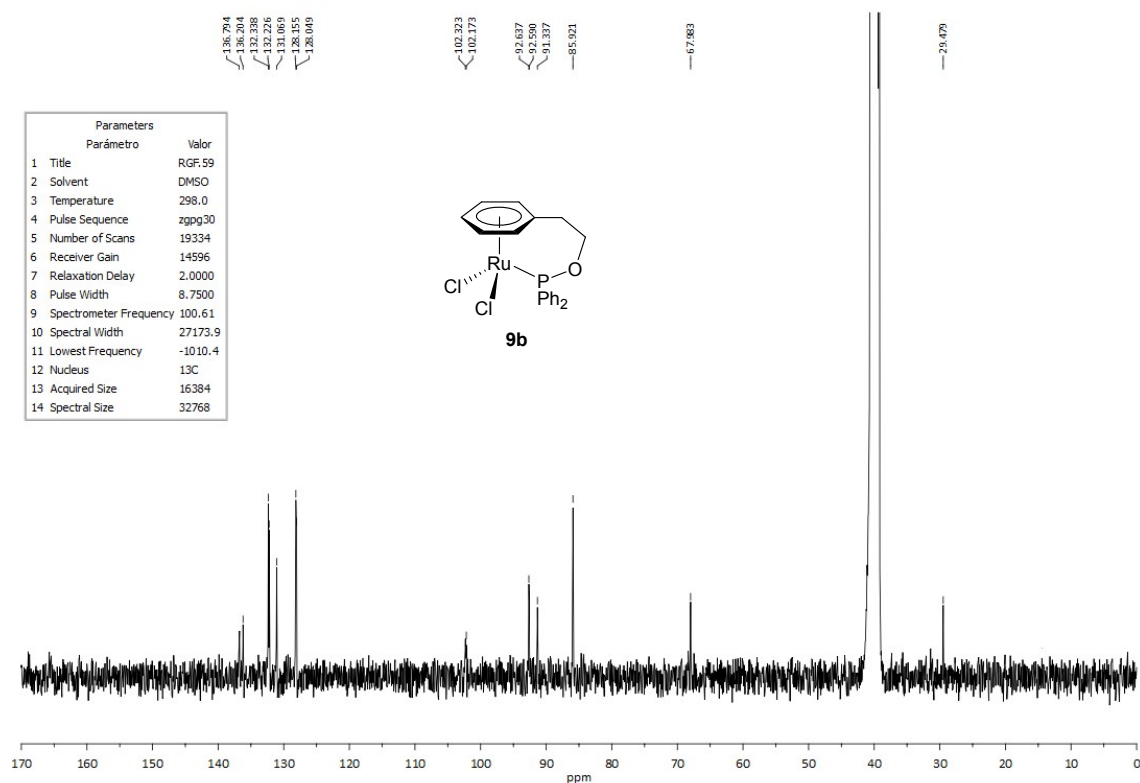

**Figure S42:**  $^{13}\text{C}\{^1\text{H}\}$  NMR spectrum (100 MHz,  $\text{DMSO-}d_6$ ) of complex **9b**.

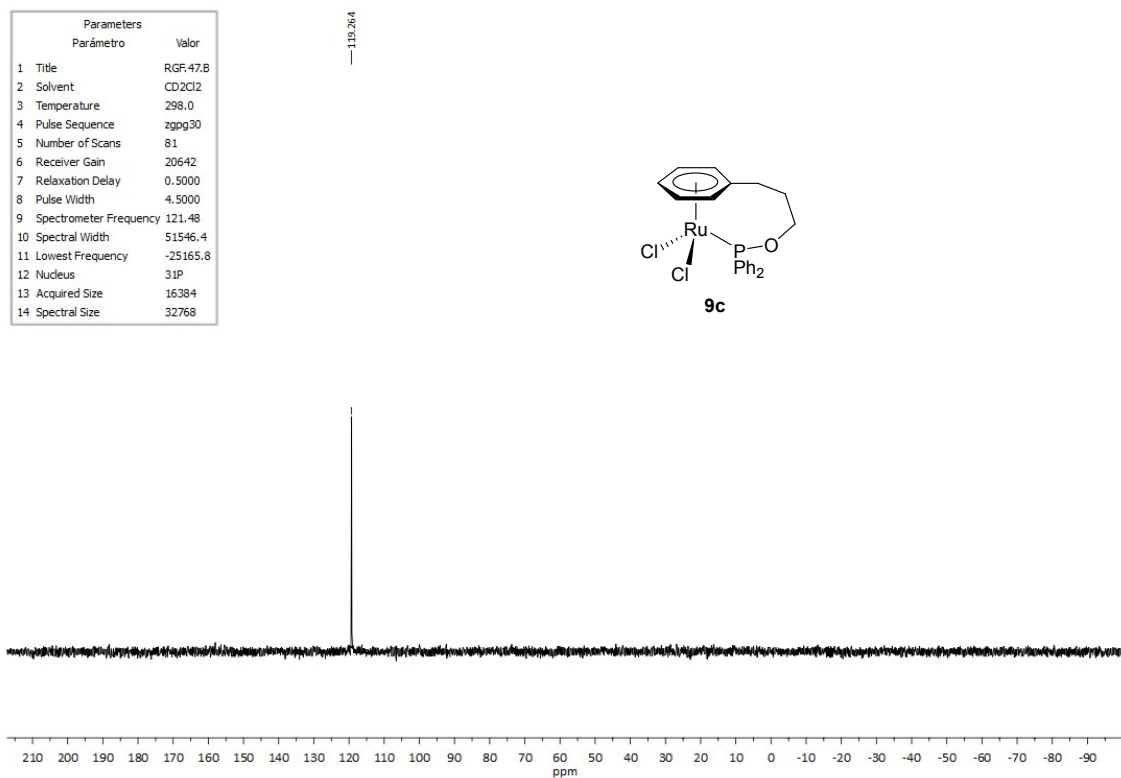

**Figure S43:**  $^{31}\text{P}\{^1\text{H}\}$  NMR spectrum (121 MHz,  $\text{CD}_2\text{Cl}_2$ ) of complex **9c**.

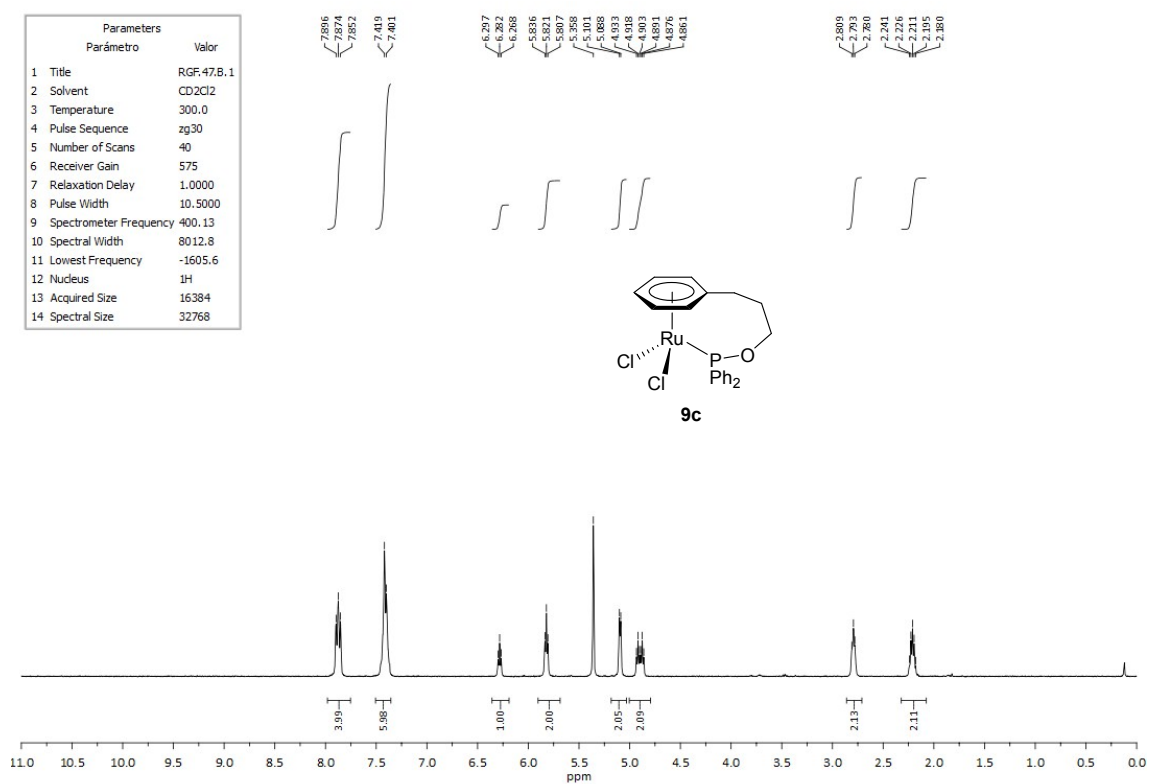

**Figure S44:**  $^1\text{H}$  NMR spectrum (300 MHz,  $\text{CD}_2\text{Cl}_2$ ) of complex **9c**.

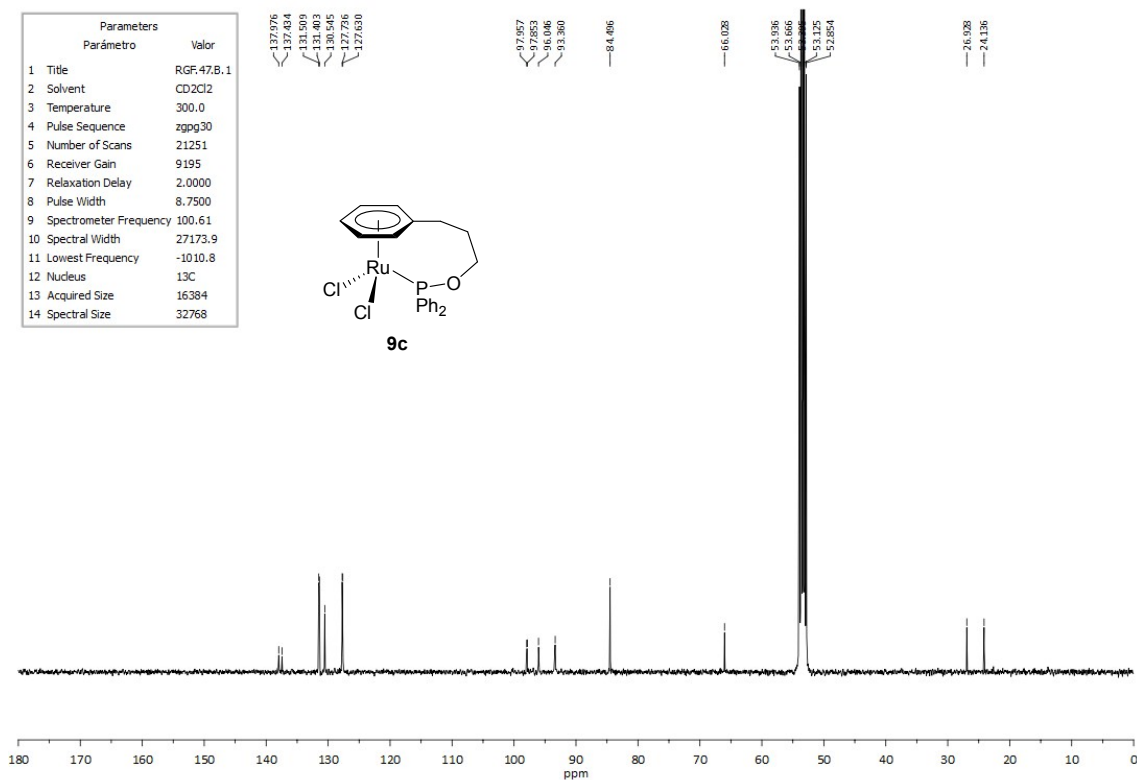

**Figure S45:**  $^{13}\text{C}\{^1\text{H}\}$  NMR spectrum (100 MHz,  $\text{CD}_2\text{Cl}_2$ ) of complex **9c**.

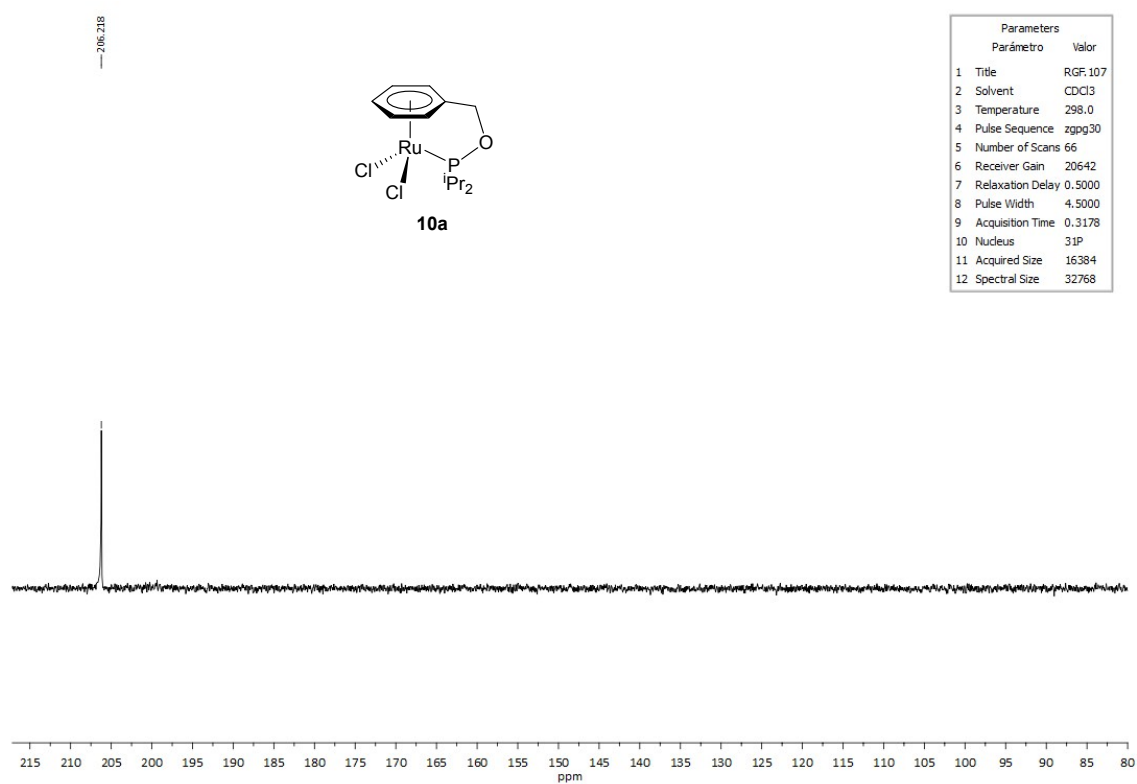

**Figure S46:**  $^{31}\text{P}\{^1\text{H}\}$  NMR spectrum (121 MHz,  $\text{CDCl}_3$ ) of complex **10a**.



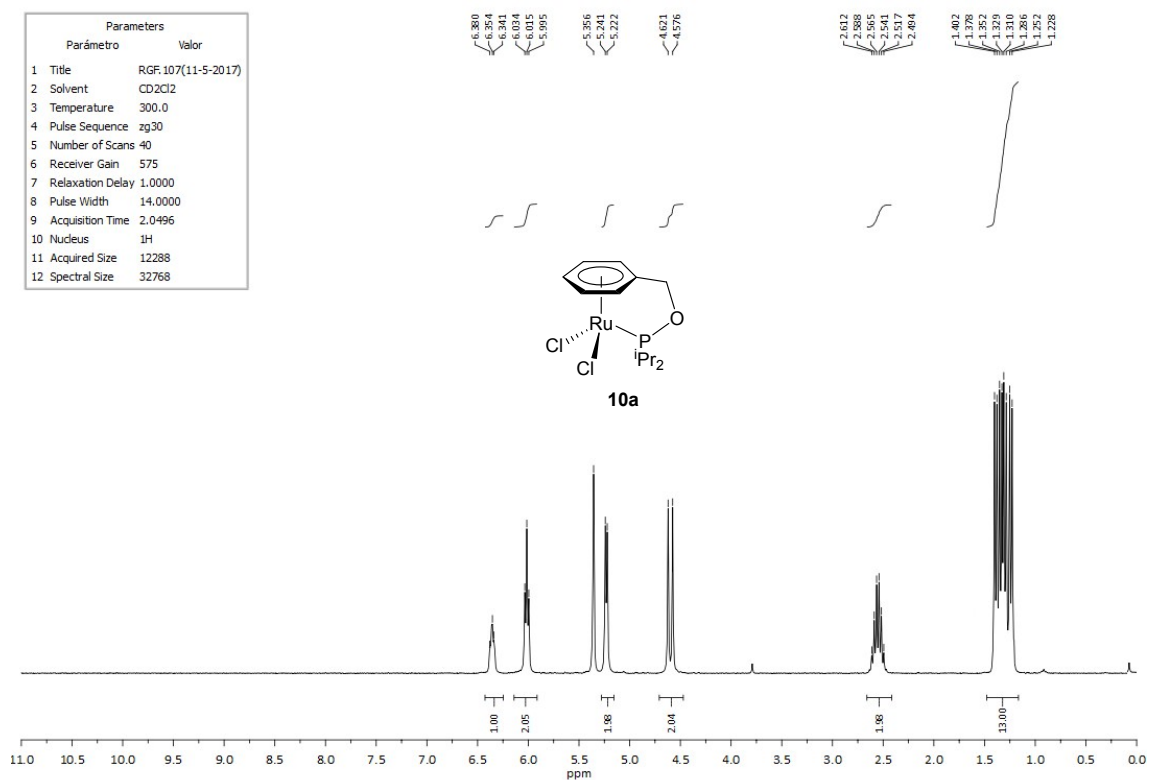

**Figure S47:**  $^1\text{H}$  NMR spectrum (300 MHz,  $\text{CD}_2\text{Cl}_2$ ) of complex **10a**.

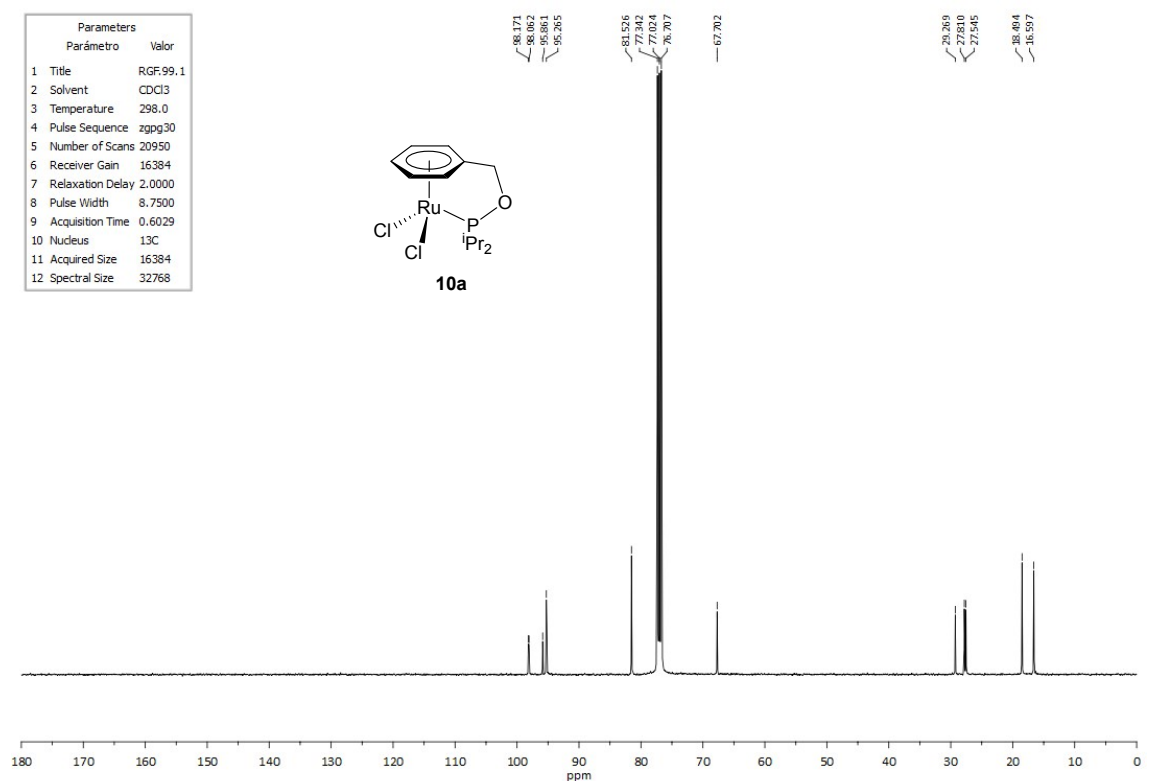

**Figure S48:**  $^{13}\text{C}\{^1\text{H}\}$  NMR spectrum (100 MHz,  $\text{CDCl}_3$ ) of complex **10a**.

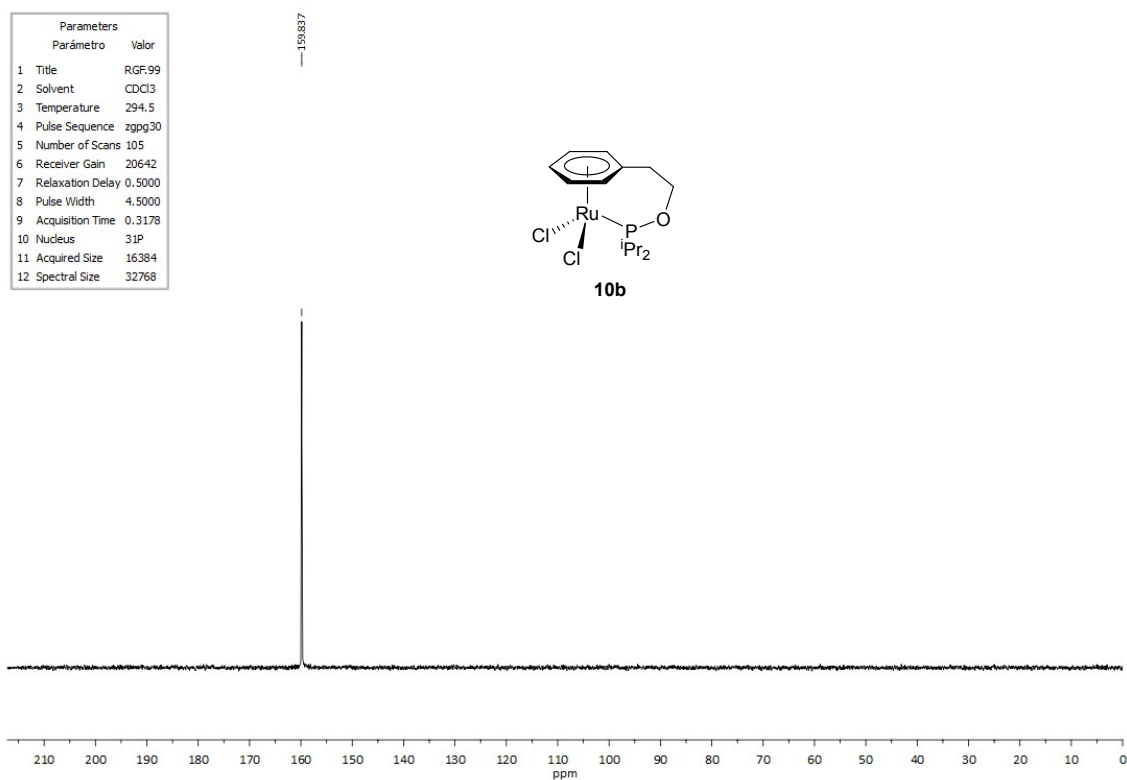

**Figure S49:**  $^{31}\text{P}\{^1\text{H}\}$  NMR spectrum (121 MHz,  $\text{CDCl}_3$ ) of complex **10b**.

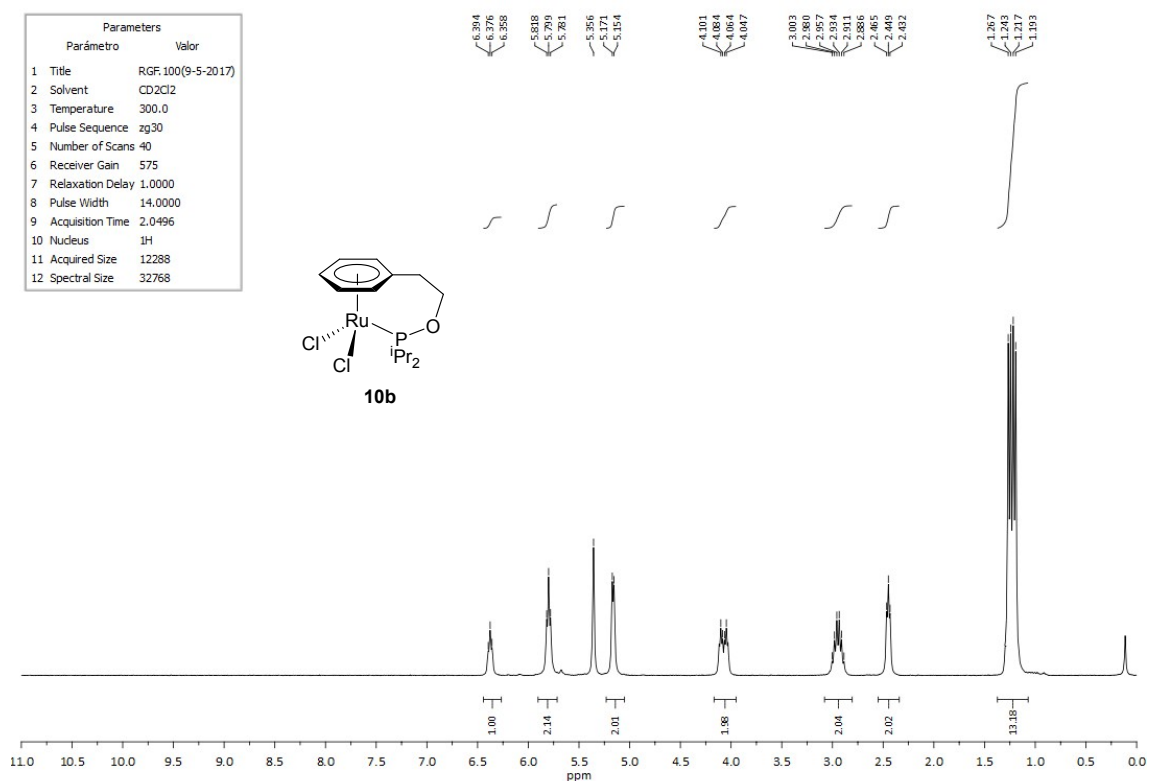

**Figure S50:**  $^1\text{H}$  NMR spectrum (300 MHz,  $\text{CD}_2\text{Cl}_2$ ) of complex **10b**.

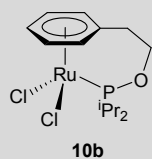

**Figure S51:**  $^{13}\text{C}\{^1\text{H}\}$  NMR spectrum (100 MHz,  $\text{CDCl}_3$ ) of complex **10b**.

| Parameters         |                 |
|--------------------|-----------------|
| Parámetro          | Valor           |
| 1 Title            | RGF.91.4        |
| 2 Solvent          | $\text{CDCl}_3$ |
| 3 Temperature      | 294.8           |
| 4 Pulse Sequence   | zgpg30          |
| 5 Number of Scans  | 75              |
| 6 Receiver Gain    | 20642           |
| 7 Relaxation Delay | 0.5000          |
| 8 Pulse Width      | 4.5000          |
| 9 Acquisition Time | 0.3178          |
| 10 Nucleus         | $^{31}\text{P}$ |
| 11 Acquired Size   | 16384           |
| 12 Spectral Size   | 32768           |

— 156.881

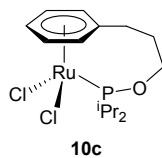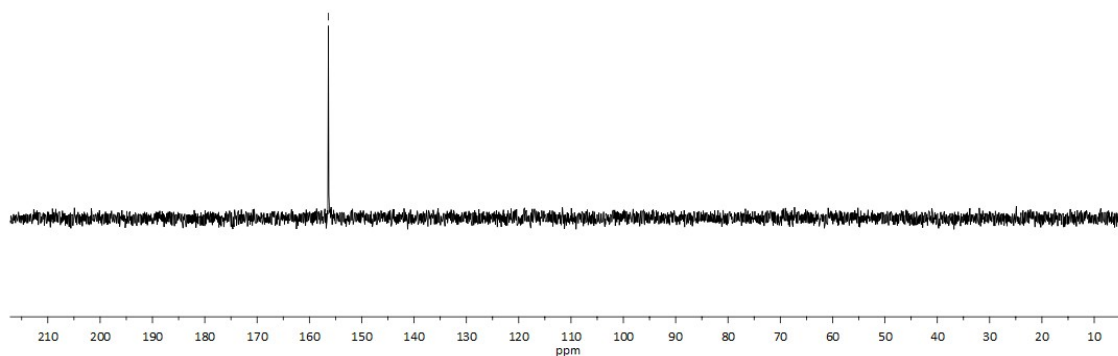

**Figure S52:**  $^{31}\text{P}\{^1\text{H}\}$  NMR spectrum (121 MHz,  $\text{CDCl}_3$ ) of complex **10c**.

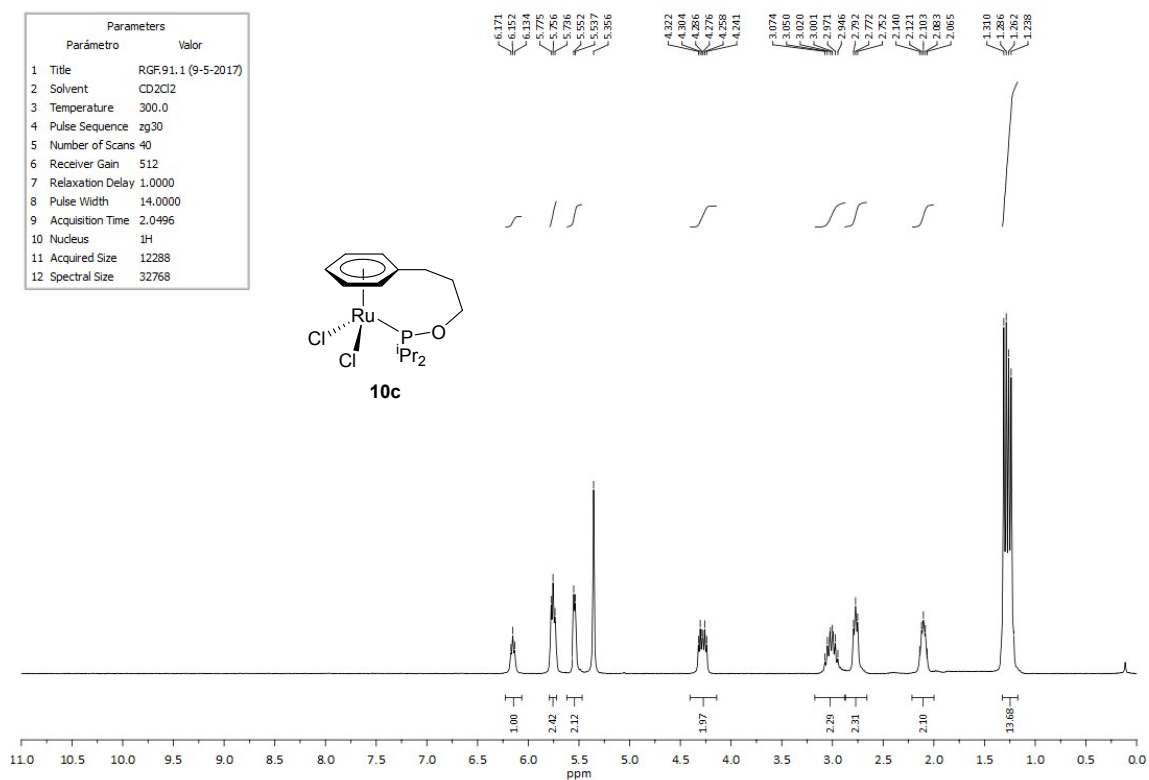

**Figure S53:**  $^1\text{H}$  NMR spectrum (300 MHz,  $\text{CD}_2\text{Cl}_2$ ) of complex **10c**.

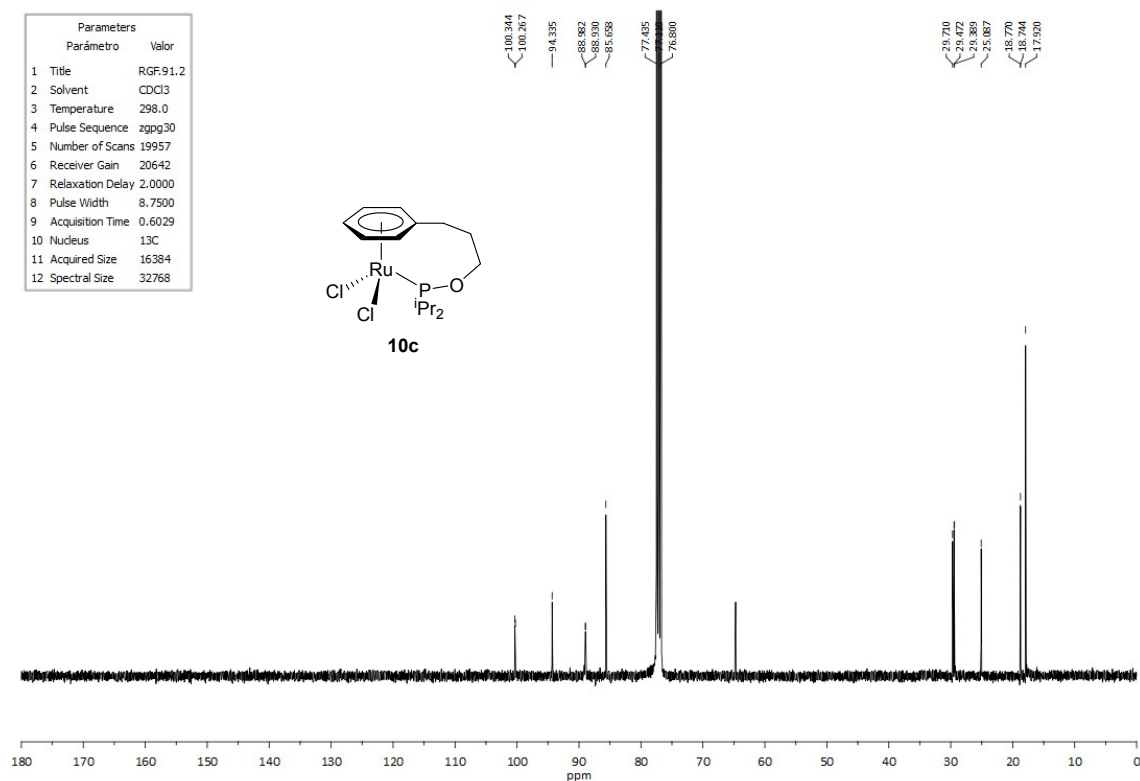

**Figure S54:**  $^{13}\text{C}\{^1\text{H}\}$  NMR spectrum (100 MHz,  $\text{CDCl}_3$ ) of complex **10c**.

## NMR spectra of the alkoxysilanes isolated from the catalytic reactions

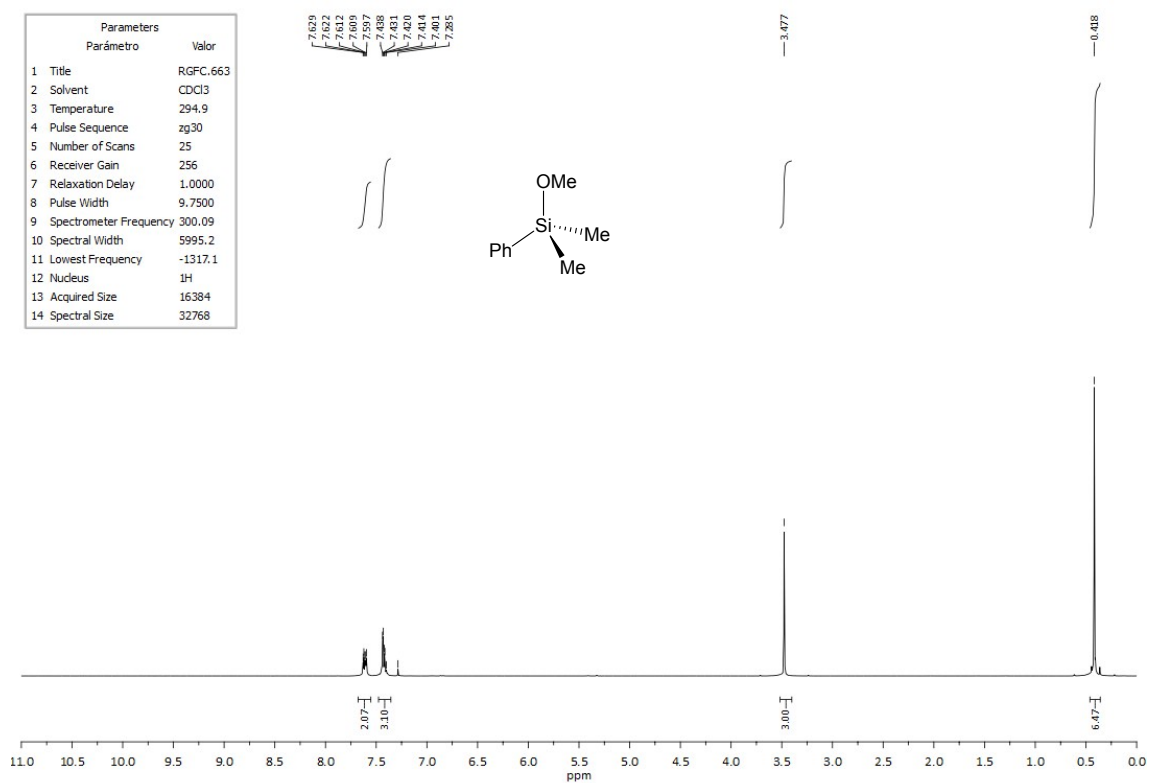

Figure S55: <sup>1</sup>H NMR spectrum (300 MHz, CDCl<sub>3</sub>) of Me<sub>2</sub>PhSiOMe.

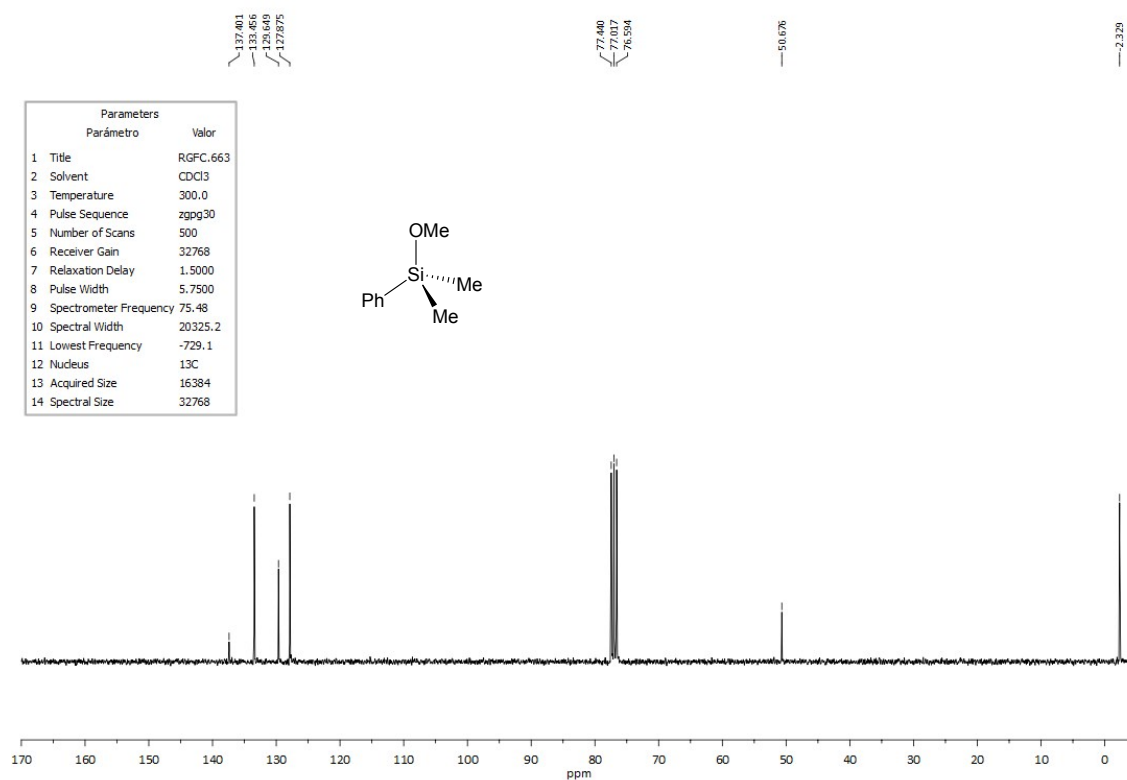

Figure S56: <sup>13</sup>C{<sup>1</sup>H} NMR spectrum (75 MHz, CDCl<sub>3</sub>) of Me<sub>2</sub>PhSiOMe.

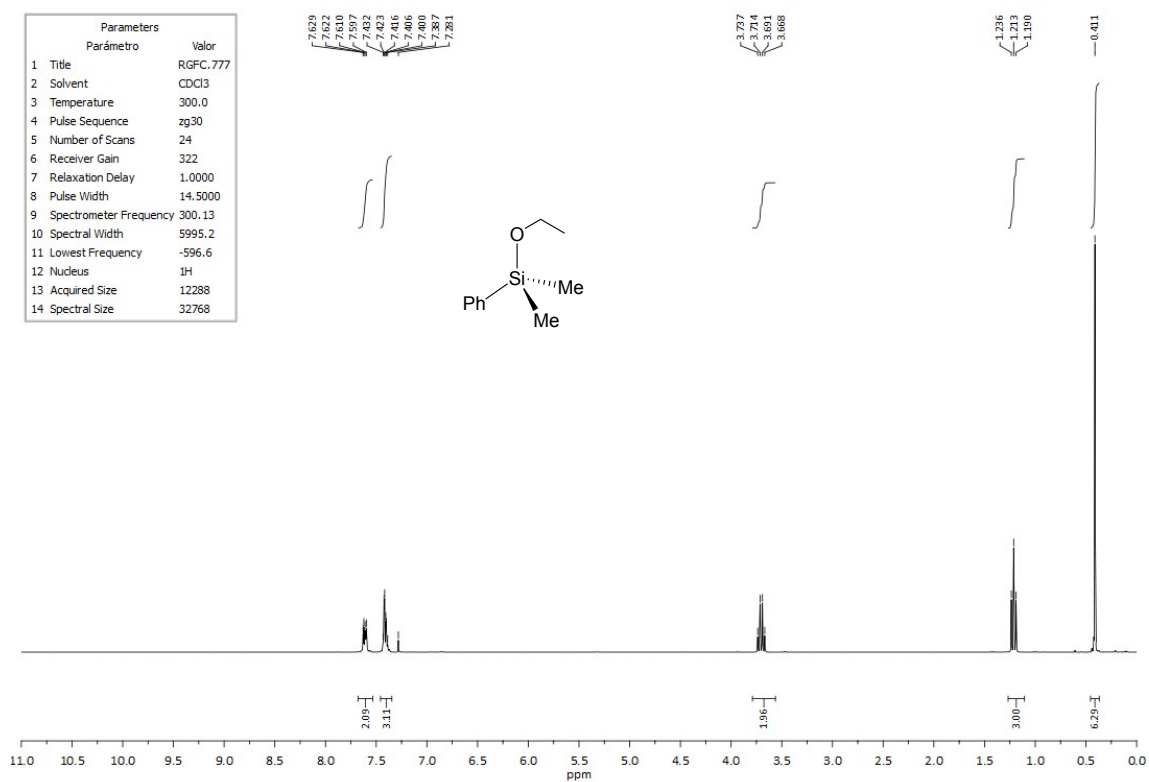

**Figure S57:** <sup>1</sup>H NMR spectrum (300 MHz, CDCl<sub>3</sub>) of Me<sub>2</sub>PhSiOEt.

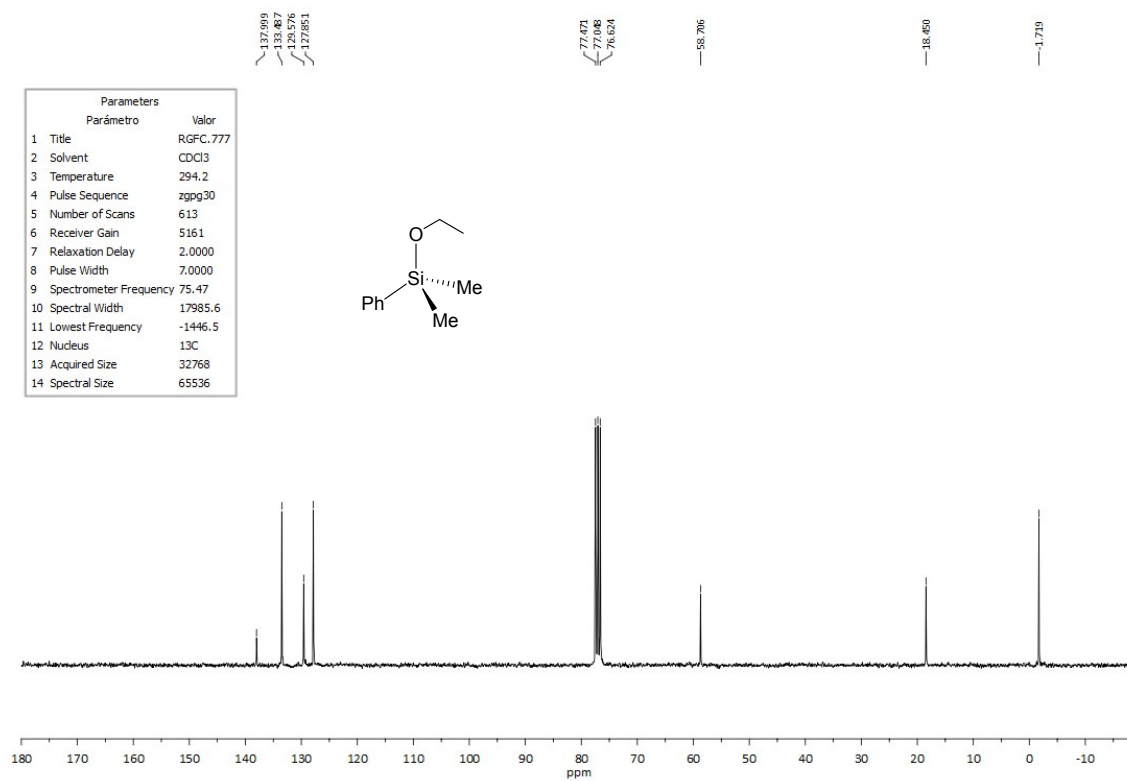

**Figure S58:** <sup>13</sup>C{<sup>1</sup>H} NMR spectrum (75 MHz, CDCl<sub>3</sub>) of Me<sub>2</sub>PhSiOEt.

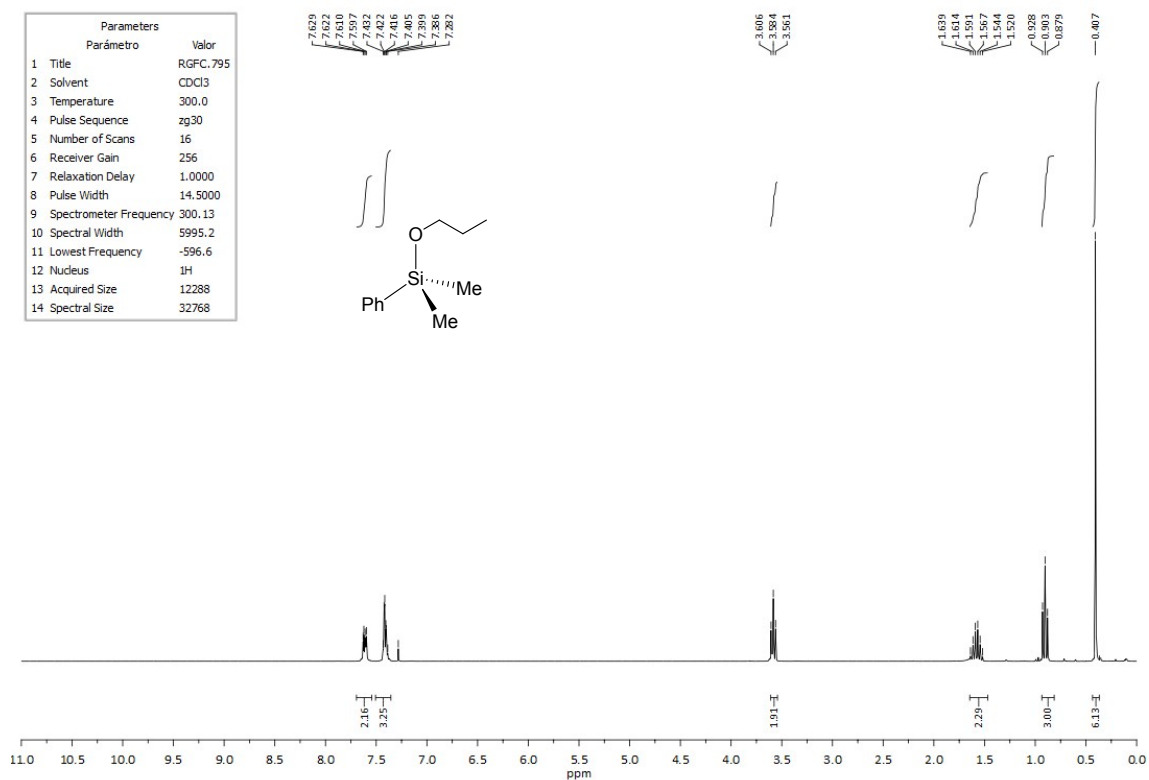

**Figure S59:**  $^1\text{H}$  NMR spectrum (300 MHz,  $\text{CDCl}_3$ ) of  $\text{Me}_2\text{PhSiO}^n\text{Pr}$ .

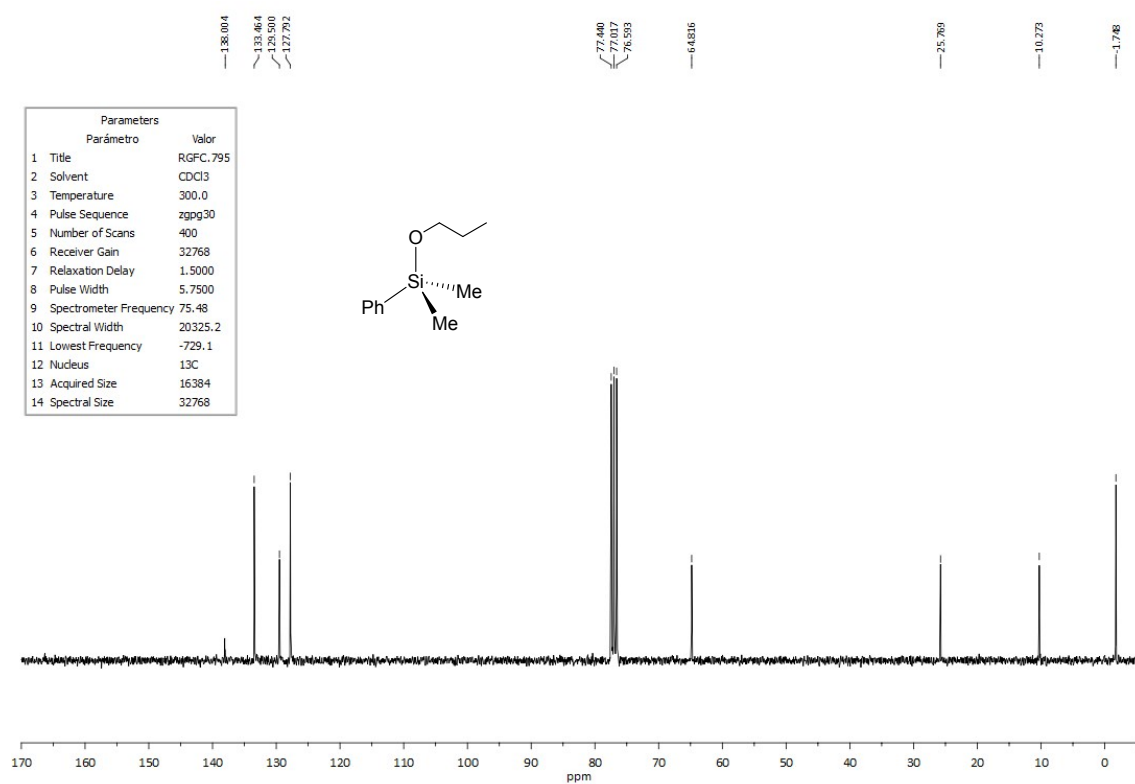

**Figure S60:**  $^{13}\text{C}\{^1\text{H}\}$  NMR spectrum (75 MHz,  $\text{CDCl}_3$ ) of  $\text{Me}_2\text{PhSiO}^n\text{Pr}$ .

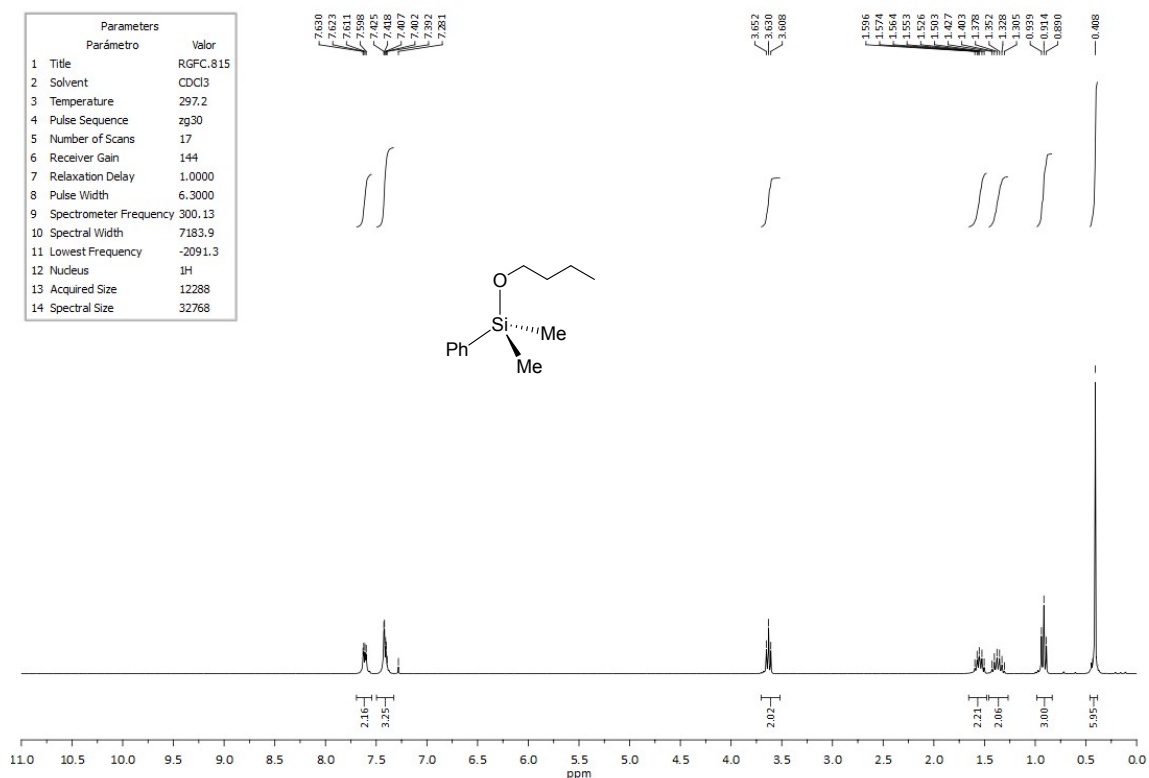

**Figure S61:**  $^1\text{H}$  NMR spectrum (300 MHz,  $\text{CDCl}_3$ ) of  $\text{Me}_2\text{PhSiO}^n\text{Bu}$ .

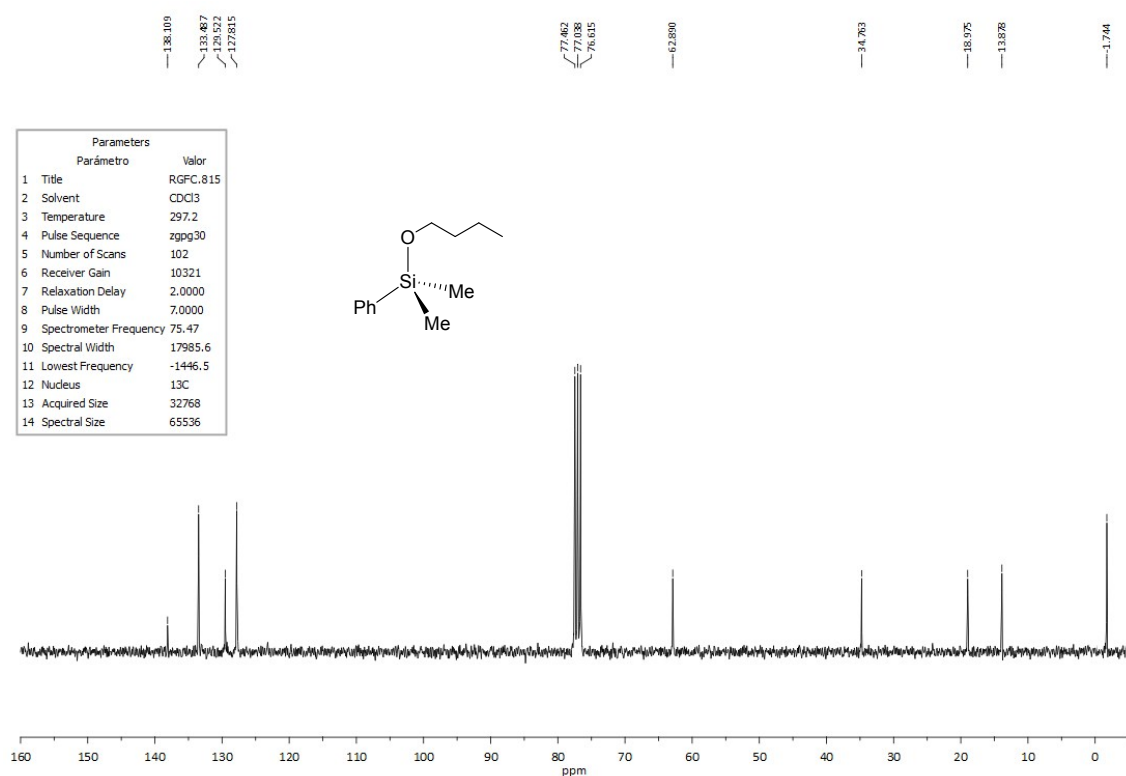

**Figure S62:**  $^{13}\text{C}\{^1\text{H}\}$  NMR spectrum (75 MHz,  $\text{CDCl}_3$ ) of  $\text{Me}_2\text{PhSiO}^n\text{Bu}$ .



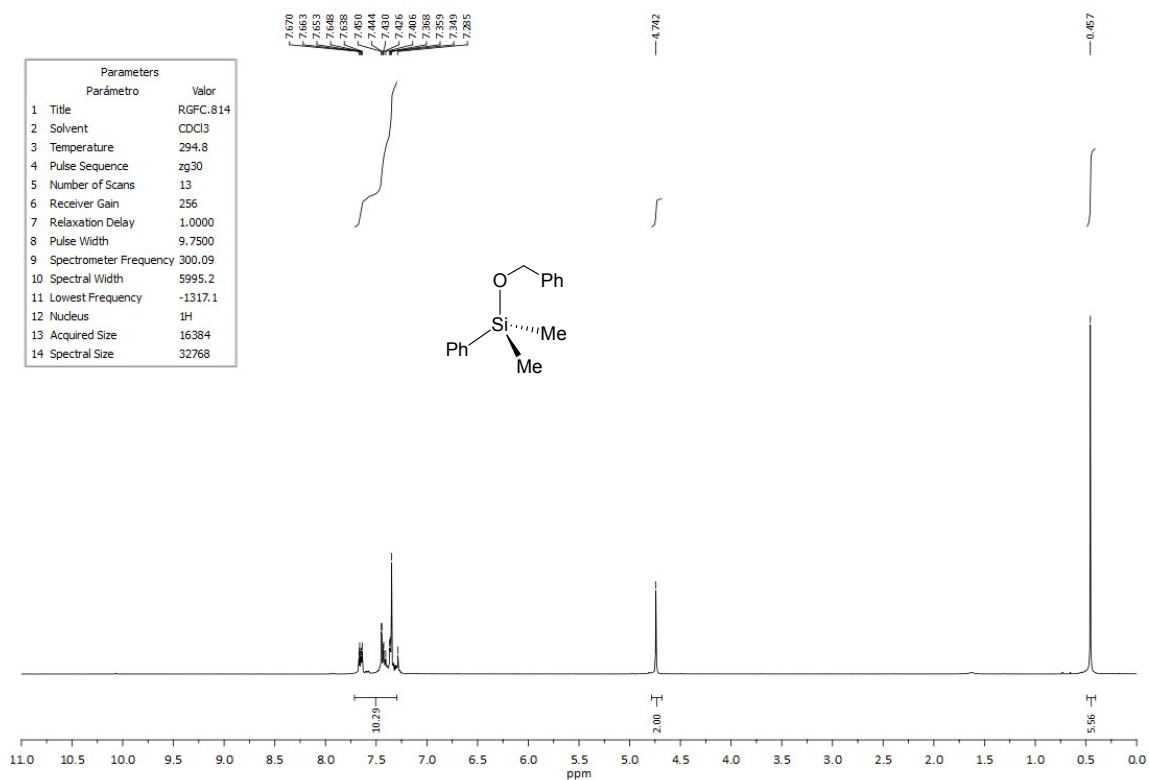

**Figure S63:** <sup>1</sup>H NMR spectrum (300 MHz, CDCl<sub>3</sub>) of Me<sub>2</sub>PhSiOBn.

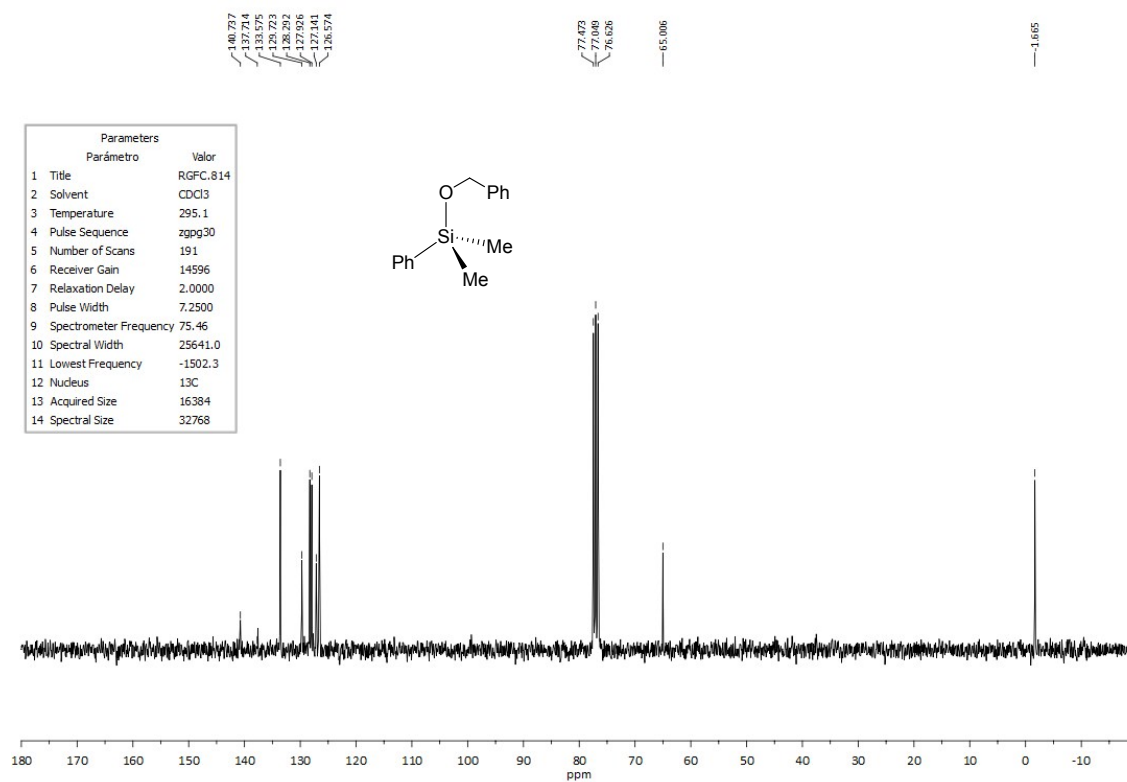

**Figure S64:** <sup>13</sup>C{<sup>1</sup>H} NMR spectrum (75 MHz, CDCl<sub>3</sub>) of Me<sub>2</sub>PhSiOBn.

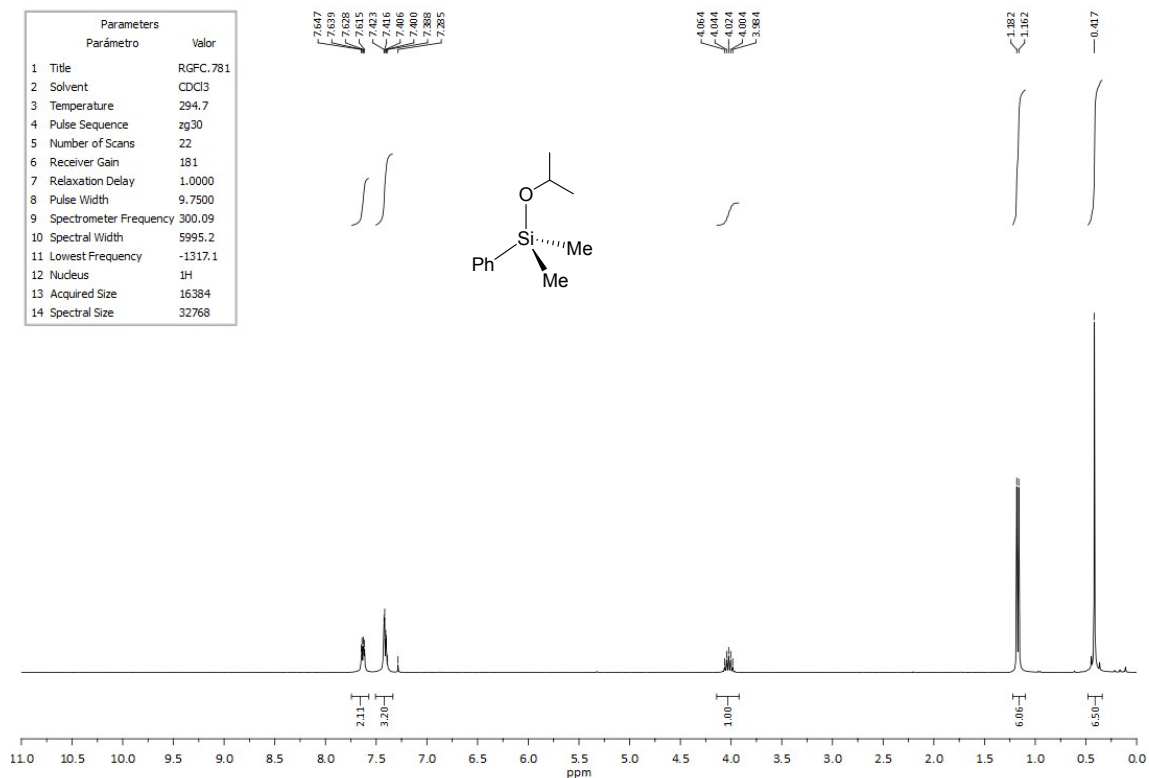

**Figure S65:** <sup>1</sup>H NMR spectrum (300 MHz, CDCl<sub>3</sub>) of Me<sub>2</sub>PhSiO<sup>i</sup>Pr.

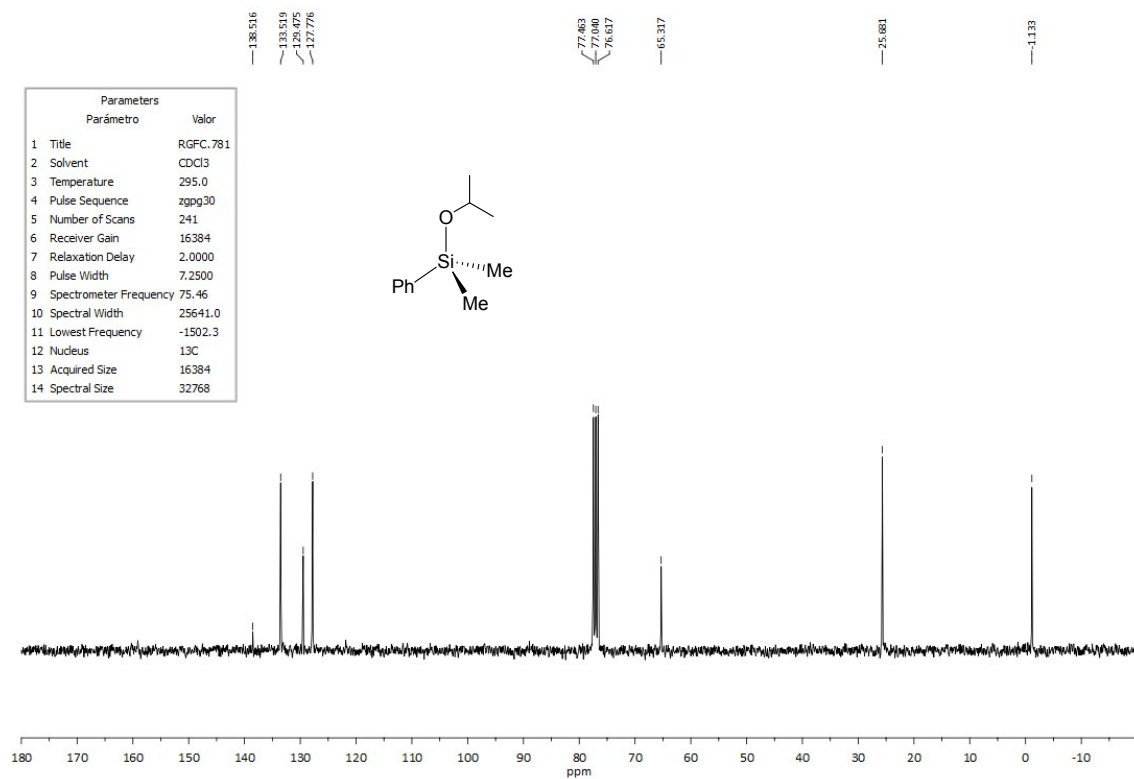

**Figure S66:** <sup>13</sup>C {<sup>1</sup>H} NMR spectrum (75 MHz, CDCl<sub>3</sub>) of Me<sub>2</sub>PhSiO<sup>i</sup>Pr.

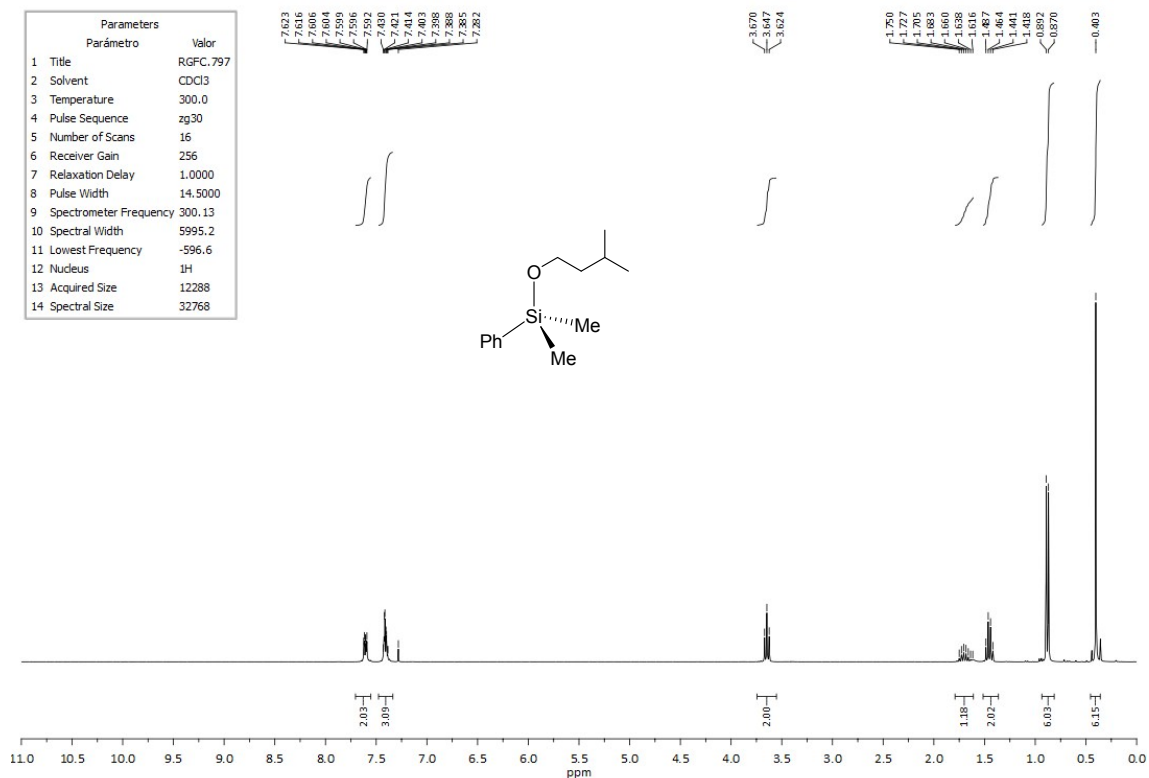

**Figure S67:**  $^1\text{H}$  NMR spectrum (300 MHz,  $\text{CDCl}_3$ ) of  $\text{Me}_2\text{PhSiOCH}_2\text{CH}_2\text{iPr}$ .

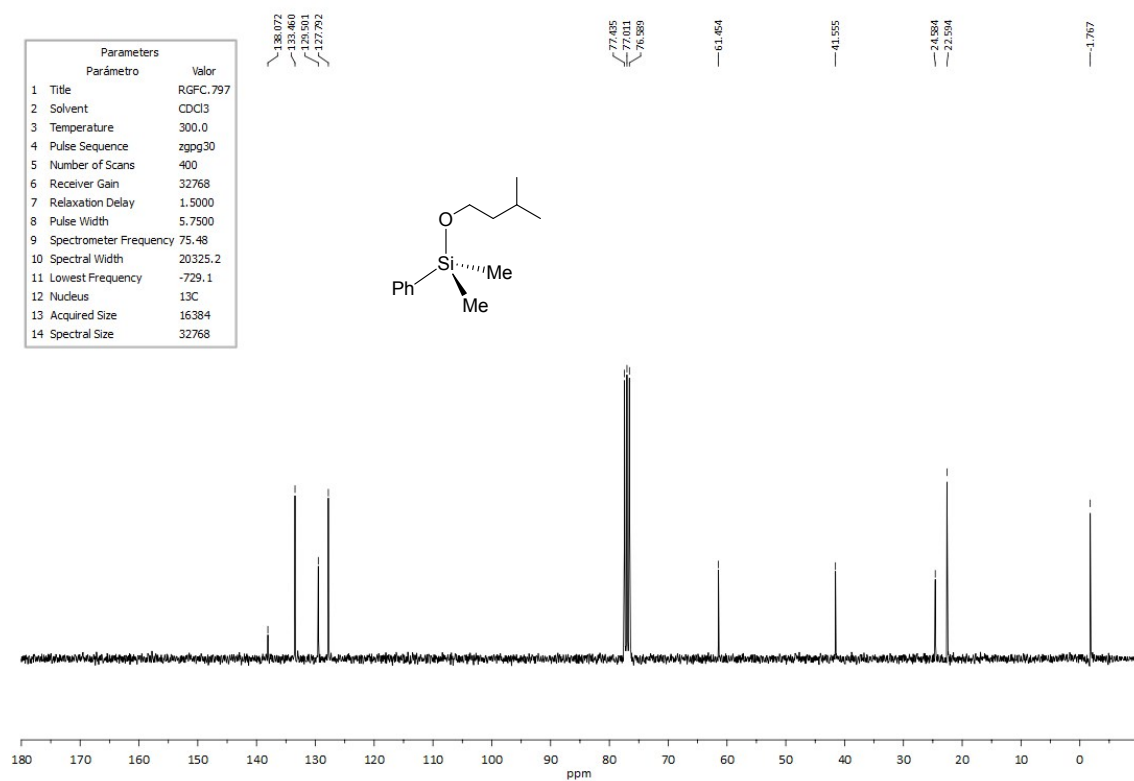

**Figure S68:**  $^{13}\text{C}\{^1\text{H}\}$  NMR spectrum (75 MHz,  $\text{CDCl}_3$ ) of  $\text{Me}_2\text{PhSiOCH}_2\text{CH}_2\text{iPr}$ .

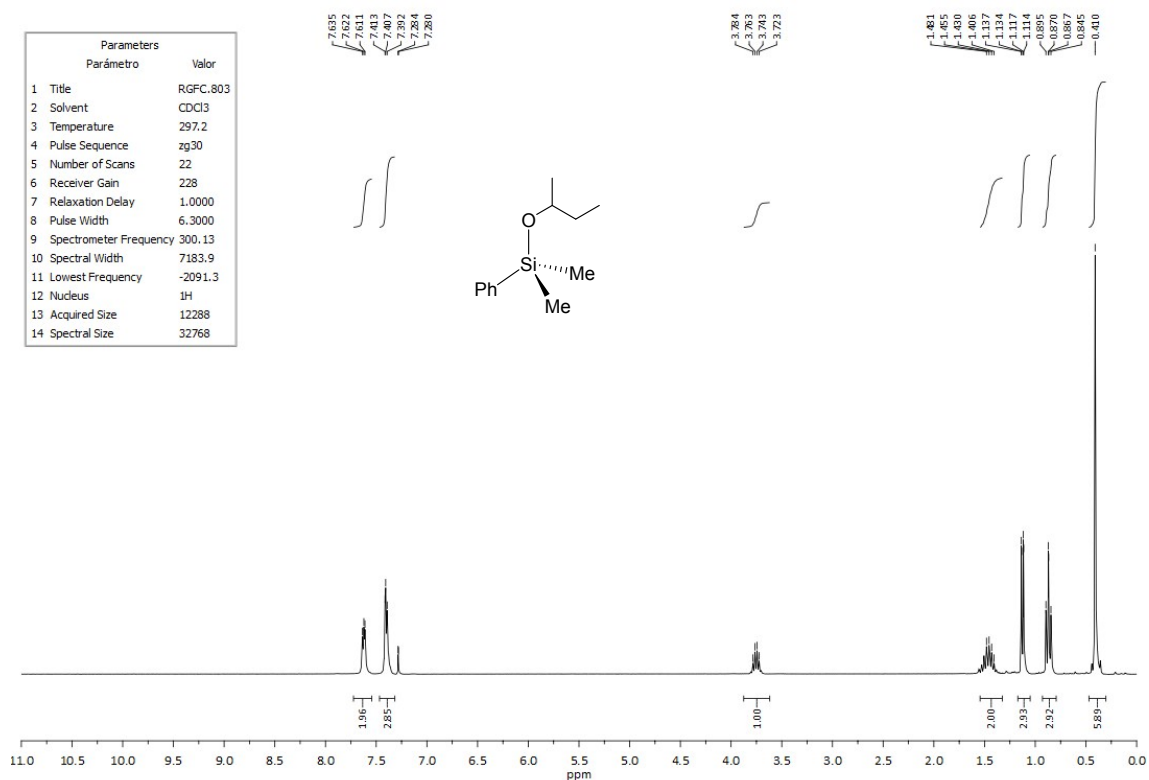

**Figure S69:**  $^1\text{H}$  NMR spectrum (300 MHz,  $\text{CDCl}_3$ ) of  $\text{Me}_2\text{PhSiOCHMeEt}$ .

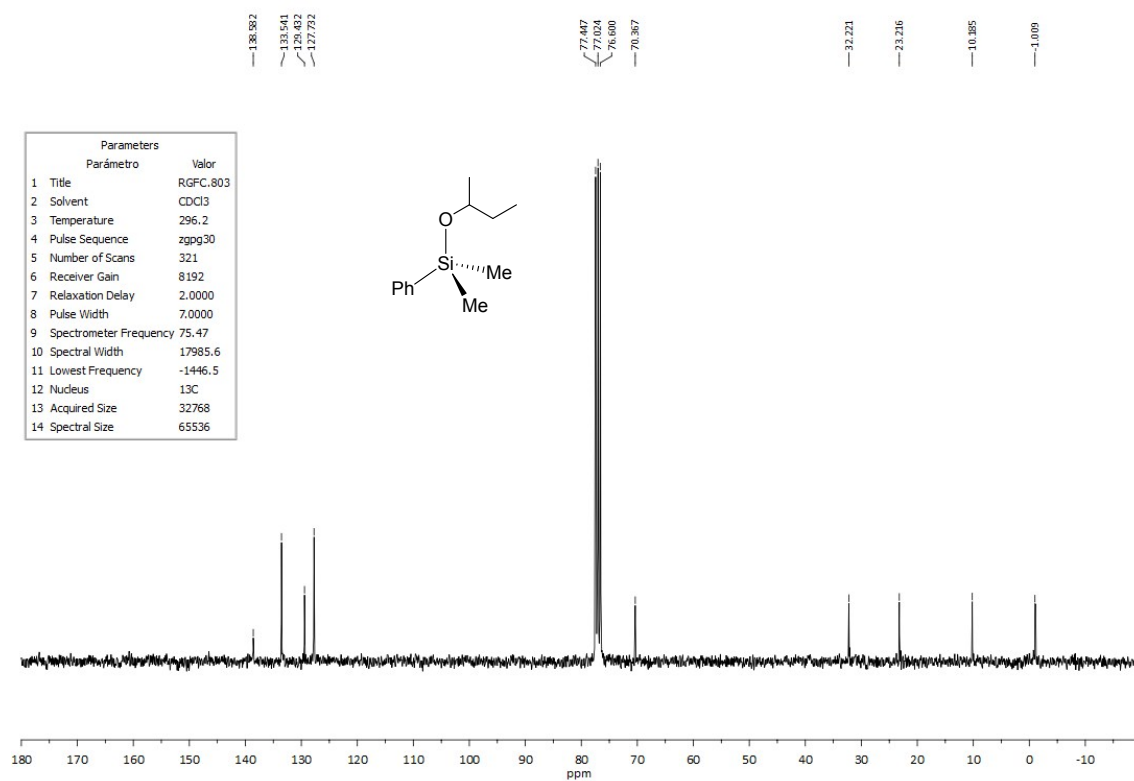

**Figure S70:**  $^{13}\text{C}\{^1\text{H}\}$  NMR spectrum (75 MHz,  $\text{CDCl}_3$ ) of  $\text{Me}_2\text{PhSiOCHMeEt}$ .

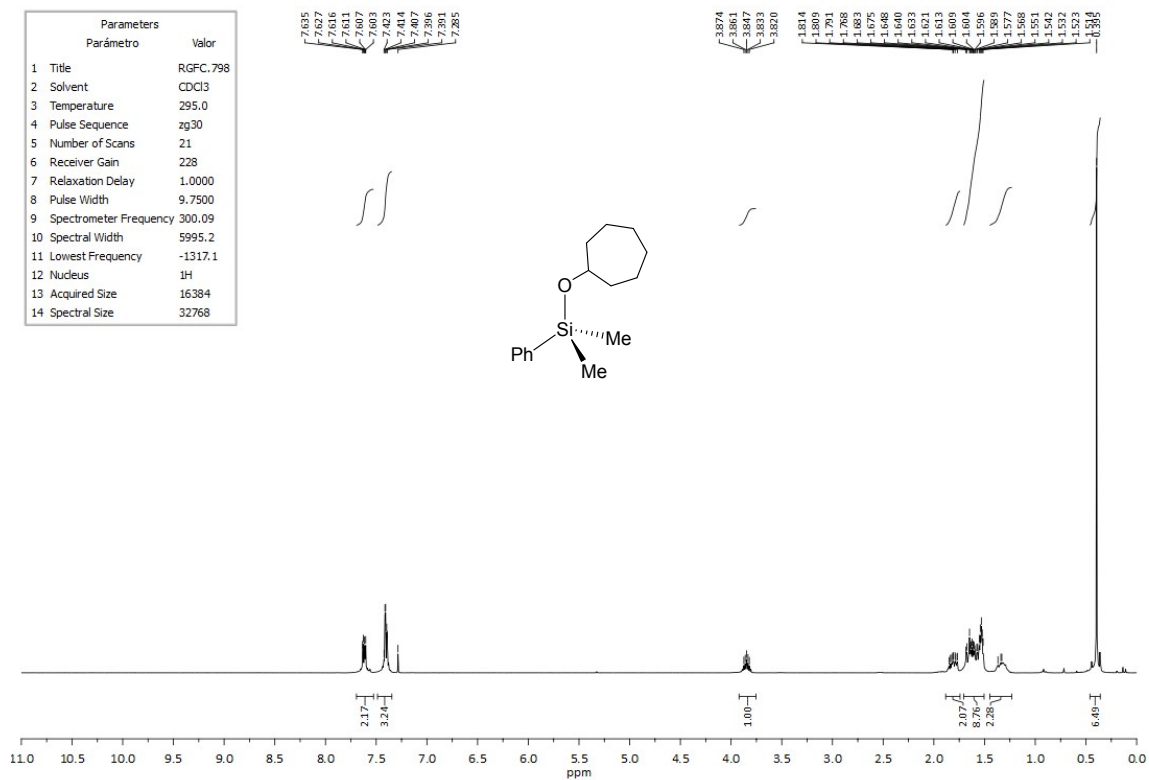

**Figure S71:** <sup>1</sup>H NMR spectrum (300 MHz, CDCl<sub>3</sub>) of Me<sub>2</sub>PhSiO<sup>c</sup>Heptyl.

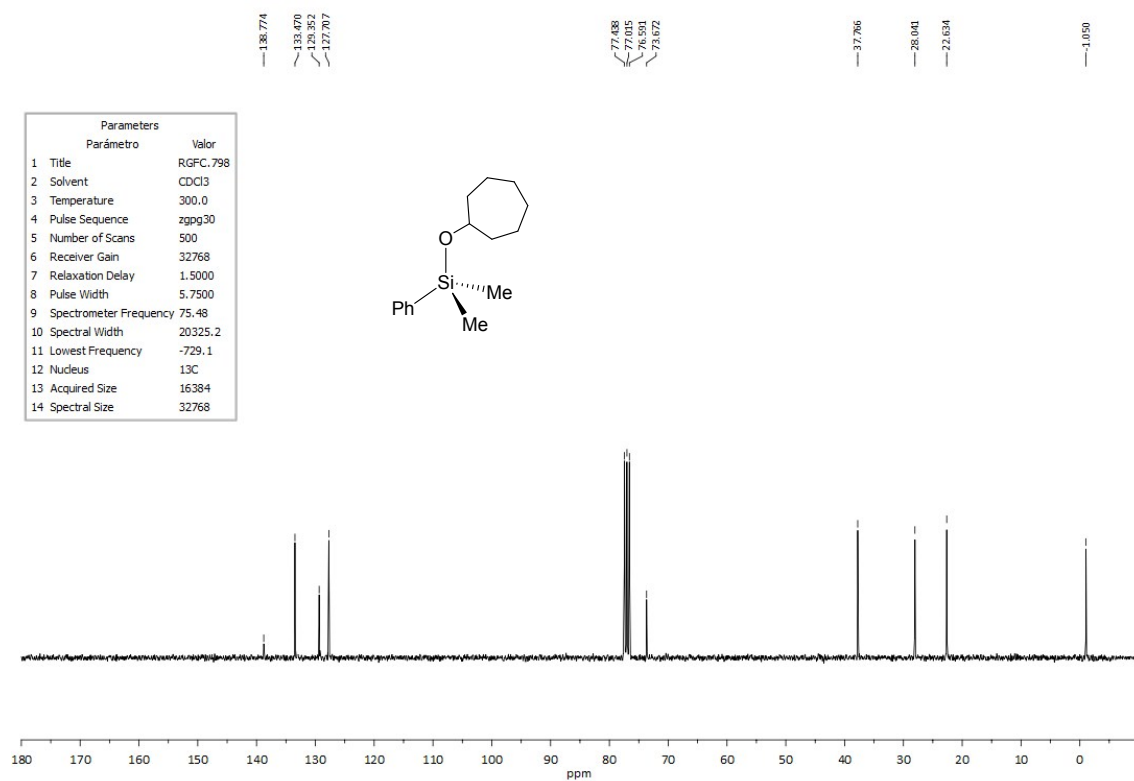

**Figure S72:** <sup>13</sup>C {<sup>1</sup>H} NMR spectrum (75 MHz, CDCl<sub>3</sub>) of Me<sub>2</sub>PhSiO<sup>c</sup>Heptyl.

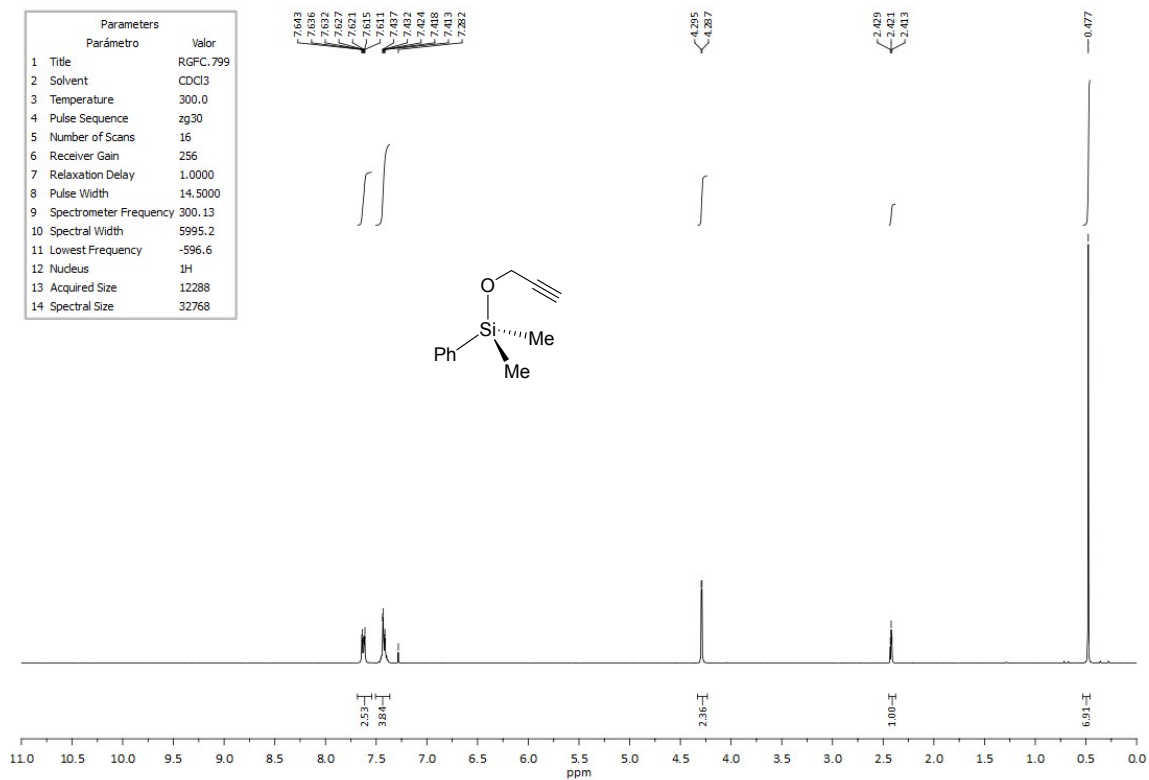

**Figure S73:**  $^1\text{H}$  NMR spectrum (300 MHz,  $\text{CDCl}_3$ ) of  $\text{Me}_2\text{PhSiOCH}_2\text{C}\equiv\text{CH}$ .

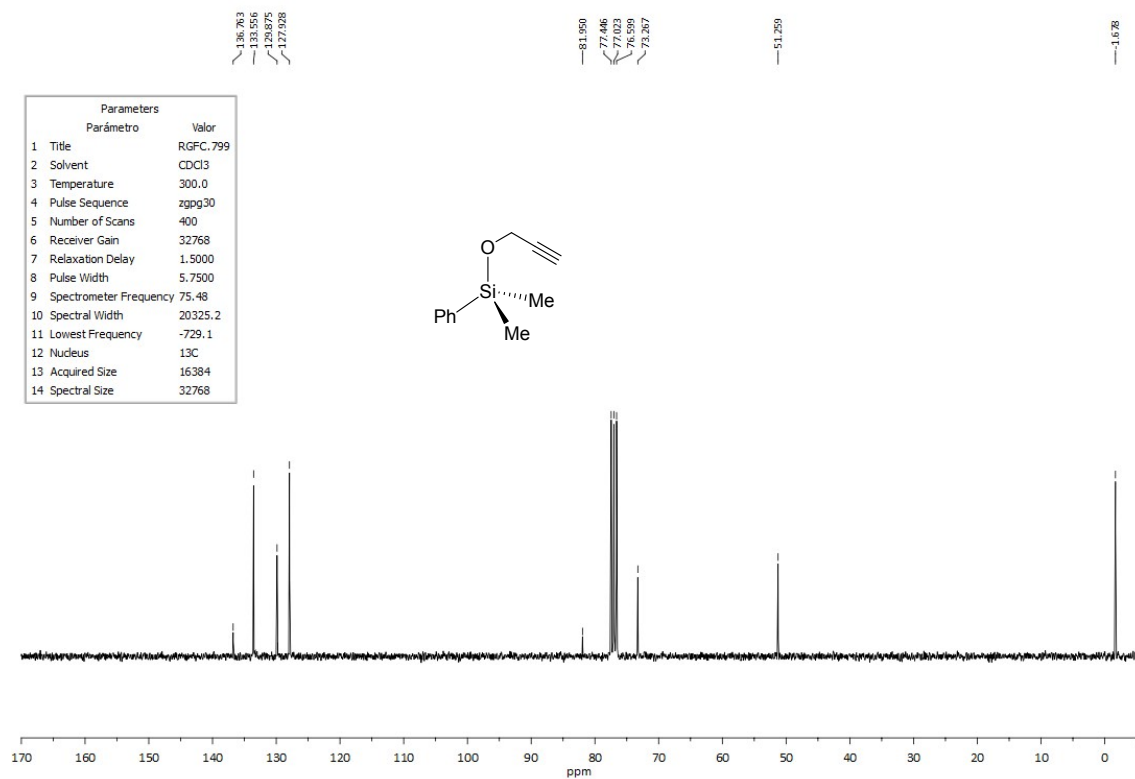

**Figure S74:**  $^{13}\text{C}\{^1\text{H}\}$  NMR spectrum (75 MHz,  $\text{CDCl}_3$ ) of  $\text{Me}_2\text{PhSiOCH}_2\text{C}\equiv\text{CH}$ .

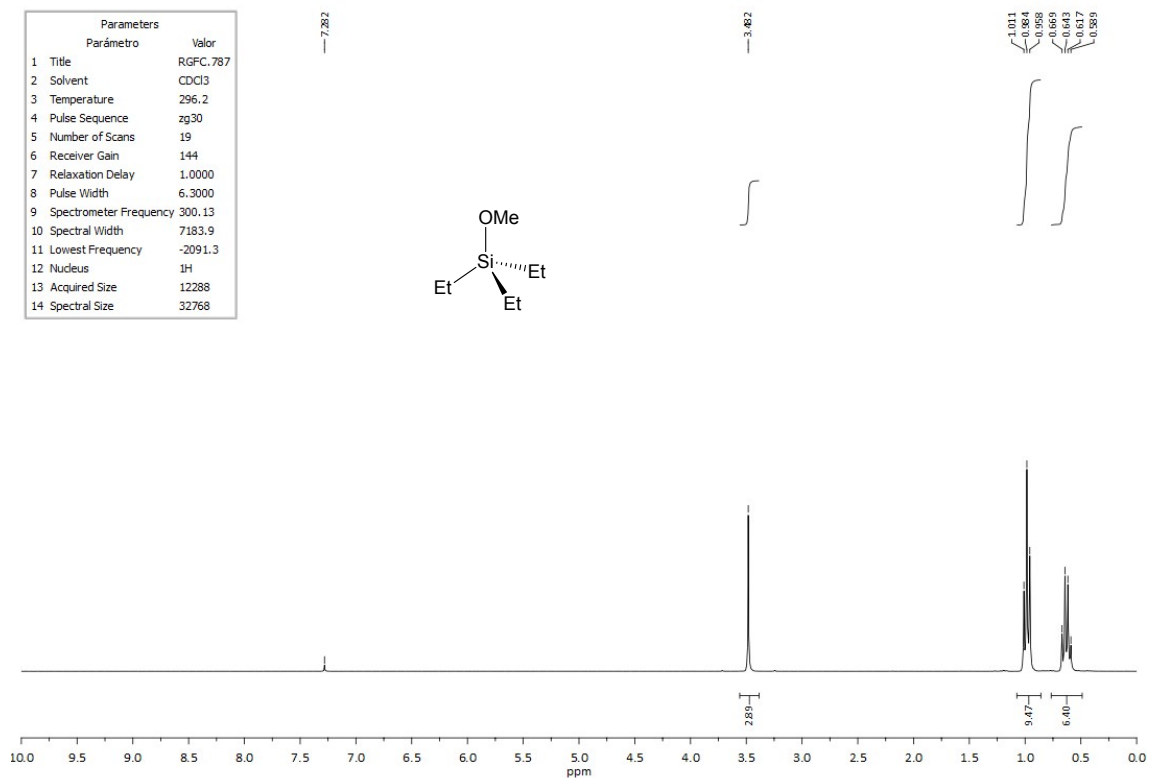

**Figure S75:**  $^1\text{H}$  NMR spectrum (300 MHz,  $\text{CDCl}_3$ ) of  $\text{Et}_3\text{SiOMe}$ .

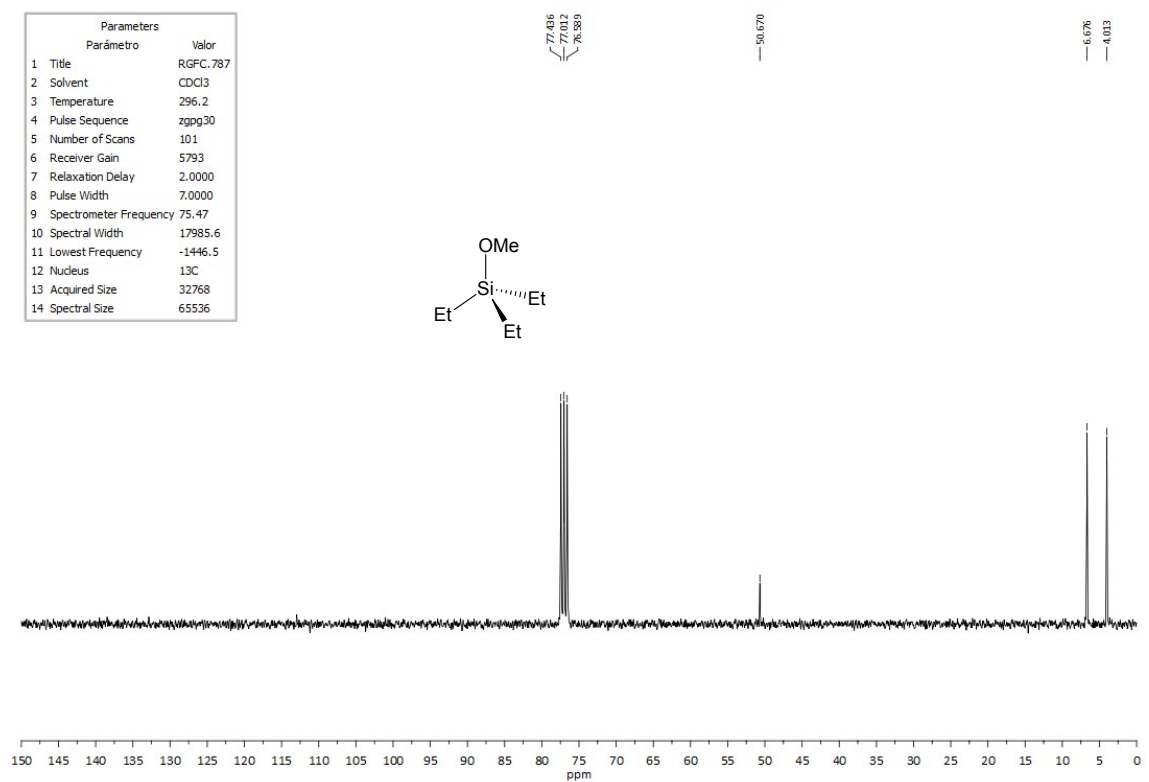

**Figure S76:**  $^{13}\text{C}\{^1\text{H}\}$  NMR spectrum (75 MHz,  $\text{CDCl}_3$ ) of  $\text{Et}_3\text{SiOMe}$ .

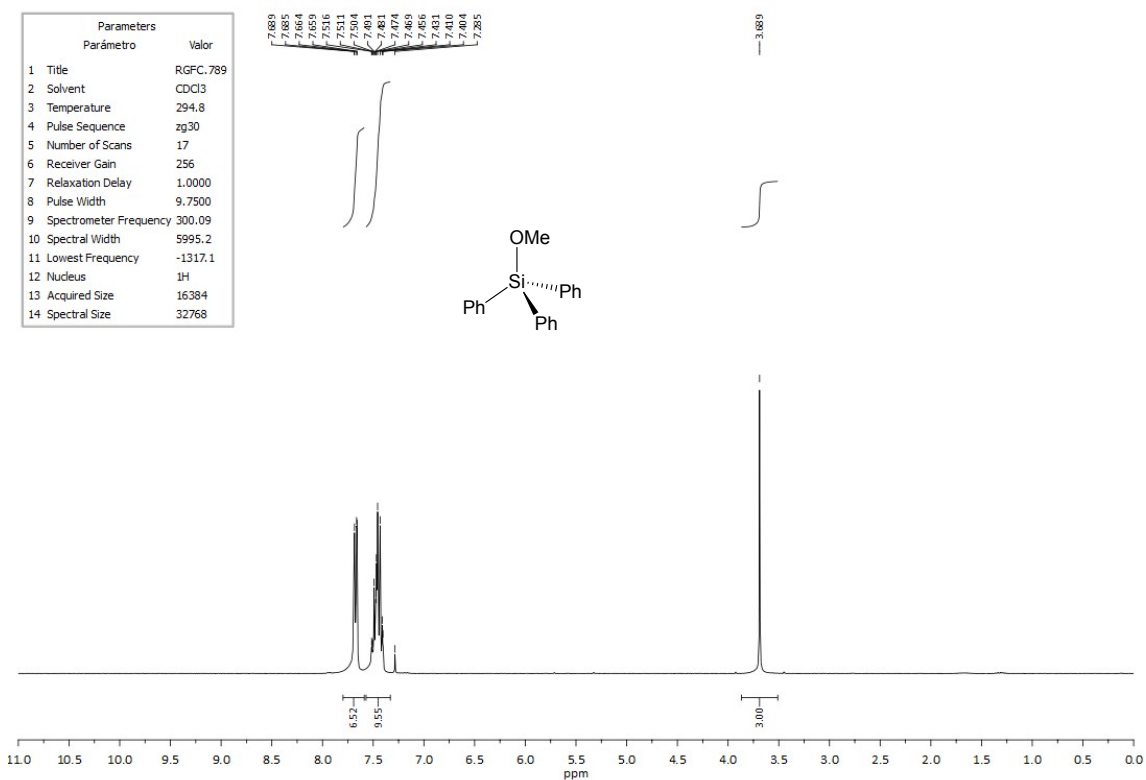

**Figure S77:**  $^1\text{H}$  NMR spectrum (300 MHz,  $\text{CDCl}_3$ ) of  $\text{Ph}_3\text{SiOMe}$ .

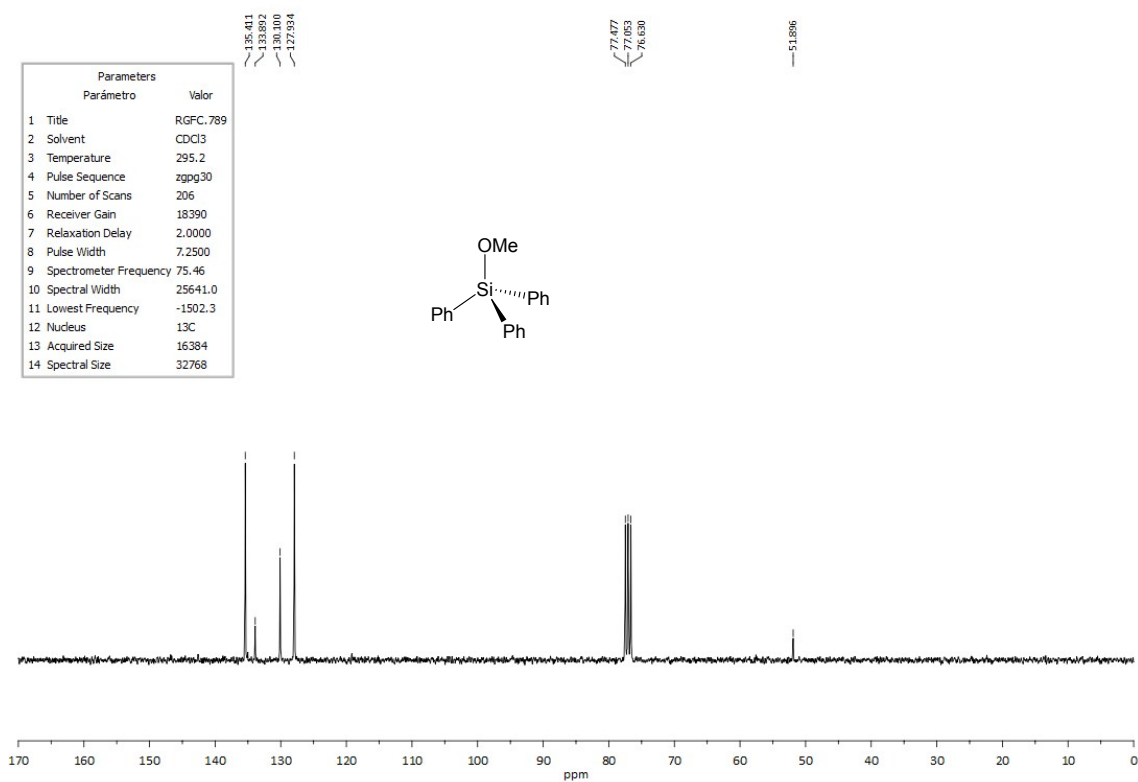

**Figure S78:**  $^{13}\text{C}\{^1\text{H}\}$  NMR spectrum (75 MHz,  $\text{CDCl}_3$ ) of  $\text{Ph}_3\text{SiOMe}$ .



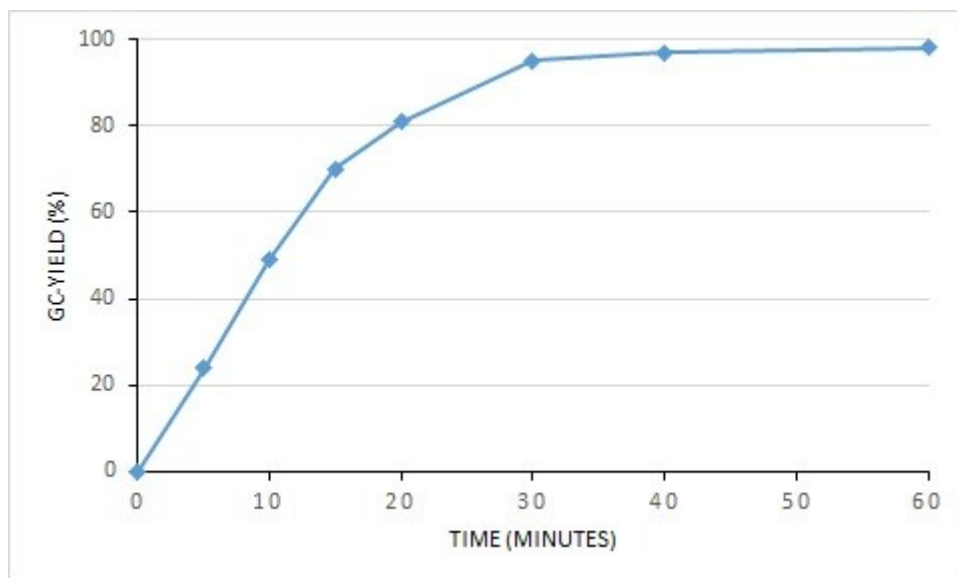

**Figure S79:**  $^{13}\text{C}\{^1\text{H}\}$  NMR spectrum (75 MHz,  $\text{CDCl}_3$ ) of  $\text{Ph}_3\text{SiOMe}$ . Kinetic profile of the dehydrogenative cross-coupling reaction of  $\text{Me}_2\text{PhSiH}$  with  $\text{MeOH}$  catalyzed by 0.005 mol% of complex **10c** (entry 13 of Table 2 of the manuscript).
